# Supplementary material for: The Landscapes of Gluten Regulatory Network in Elite Wheat Cultivars Contrasting in Gluten Strength
Source: Int J Mol Sci. 2023 May 29;24(11):9447. doi: 10.3390/ijms24119447 (PMC10253585; doi:10.3390/ijms24119447)
Supplement: Supplementary file 1 [file ijms-24-09447-s001.zip]

Archive with 7 entries (7 files):
- Figures S1-S4.pdf
- Table S1.xlsx
- Table S11-S15.xlsx
- Table S16.xlsx
- Table S17.xlsx
- Table S2-S7.xlsx
- Table S8-S10.xlsx
