# Supplementary material for: The Landscapes of Gluten Regulatory Network in Elite Wheat Cultivars Contrasting in Gluten Strength
Source: Int J Mol Sci. 2023 May 29;24(11):9447. doi: 10.3390/ijms24119447 (PMC10253585; doi:10.3390/ijms24119447)
Supplement: Supplementary file 1 [file ijms-24-09447-s001.zip › Table S1.xlsx]

## Sheet: Tabel S1
Table S1: Summary of PacBio full-length sequencing
Samples	Number of ccs	Mean Read Length of CCS	Number of full-length non-chimeric reads	Full-length non-chimeric percentage (FLNC%)	Number of consensus isoforms	Number of polished high-quality isoforms	Number of nonredundant isoforms
Y13N	336956	1797	241555	0.7169	65107	65098	44709
Z168N	436610	1265	370087	0.8476	93881	93863	51942
