# Supplementary material for: The Landscapes of Gluten Regulatory Network in Elite Wheat Cultivars Contrasting in Gluten Strength
Source: Int J Mol Sci. 2023 May 29;24(11):9447. doi: 10.3390/ijms24119447 (PMC10253585; doi:10.3390/ijms24119447)
Supplement: Supplementary file 1 [file ijms-24-09447-s001.zip › Table S2-S7.xlsx]

## Sheet: Table S2
Supplementary Table S2: Differentially enriched GO terms in Z168N vs. Y13N
NAME	SIZE	ES	NES	NOM p-val	FDR q-val
BP: RESPONSE TO HEAT (GO:0009408)	255	0.700174	2.75705	0	0
MF: HSP90 PROTEIN BINDING (GO:0051879)	28	0.85372	2.42218	0	0
MF: UNFOLDED PROTEIN BINDING (GO:0051082)	324	0.599409	2.41246	0	0
BP: RESPONSE TO HYDROGEN PEROXIDE (GO:0042542)	144	0.642096	2.40692	0	0
MF: CHAPERONE BINDING (GO:0051087)	118	0.657635	2.39309	0	0
BP: RESPONSE TO REACTIVE OXYGEN SPECIES (GO:0000302)	67	0.69743	2.34106	0	0
BP: PROTEIN COMPLEX OLIGOMERIZATION (GO:0051259)	60	0.691853	2.24392	0	0
MF: PREPROTEIN BINDING (GO:0070678)	13	0.891434	2.12412	0	0.000215035
MF: PROTEIN SELF-ASSOCIATION (GO:0043621)	81	0.62762	2.14019	0	0.000234584
BP: PROTEIN HOMOOLIGOMERIZATION (GO:0051260)	47	0.686799	2.15143	0	0.000258042
BP: RESPONSE TO HIGH LIGHT INTENSITY (GO:0009644)	119	0.583	2.10628	0	0.000264405
BP: CHAPERONE-MEDIATED PROTEIN COMPLEX ASSEMBLY (GO:0051131)	20	0.818025	2.15541	0	0.000286714
CC: PHOTOSYSTEM II (GO:0009523)	72	0.609831	2.09333	0	0.000306566
BP: RESPONSE TO TEMPERATURE STIMULUS (GO:0009266)	234	0.550513	2.15961	0	0.000322553
BP: PROTEIN FOLDING (GO:0006457)	599	0.495517	2.0778	0	0.00048567
BP: CHAPERONE-MEDIATED PROTEIN FOLDING (GO:0061077)	65	0.610473	2.07162	0	0.000508419
CC: ENDOPLASMIC RETICULUM LUMEN (GO:0005788)	71	0.623399	2.07811	0	0.000518048
MF: RIBULOSE-BISPHOSPHATE CARBOXYLASE ACTIVITY (GO:0016984)	21	0.778115	2.06369	0	0.000528308
MF: FK506 BINDING (GO:0005528)	34	0.707293	2.0609	0	0.000591743
MF: CHLOROPHYLL BINDING (GO:0016168)	69	0.604046	2.02694	0	0.00112582
CC: PHOTOSYSTEM I (GO:0009522)	76	0.583848	1.99942	0	0.00251744
BP: METHIONINE METABOLIC PROCESS (GO:0006555)	13	0.848268	1.99139	0	0.0028369
BP: PHOTOSYNTHESIS, LIGHT HARVESTING IN PHOTOSYSTEM I (GO:0009768)	24	0.716432	1.96639	0	0.00482515
BP: PROTEIN-CHROMOPHORE LINKAGE (GO:0018298)	80	0.567872	1.94235	0	0.00733564
BP: RESPONSE TO CADMIUM ION (GO:0046686)	126	0.524116	1.93582	0	0.00790837
BP: REGULATION OF MERISTEM GROWTH (GO:0010075)	29	0.652321	1.86169	0	0.0307822
BP: PROTEIN REFOLDING (GO:0042026)	45	0.589956	1.8525	0.00145773	0.0340735
BP: LIPID TRANSPORT (GO:0006869)	193	0.474856	1.83959	0	0.0394167
BP: CELLULAR RESPONSE TO HEAT (GO:0034605)	45	0.592319	1.83713	0	0.0397311
BP: RESPONSE TO ANTIBIOTIC (GO:0046677)	46	0.581032	1.80829	0	0.0606235
BP: CHAPERONE COFACTOR-DEPENDENT PROTEIN REFOLDING (GO:0051085)	40	0.581519	1.79709	0	0.0671047
BP: RESPONSE TO METAL ION (GO:0010038)	119	0.494065	1.79807	0	0.0682631
MF: CITRATE (SI)-SYNTHASE ACTIVITY (GO:0004108)	11	0.774655	1.79029	0.0034904	0.0715534
BP: PHOTOSYNTHESIS (GO:0015979)	237	0.450264	1.77555	0	0.0865471
BP: RENAL SYSTEM DEVELOPMENT (GO:0072001)	12	0.75476	1.77065	0.00340136	0.0910106
BP: RESPONSE TO DRUG (GO:0042493)	75	0.516945	1.76301	0.00141443	0.0958746
BP: PHOTOSYNTHESIS, LIGHT HARVESTING (GO:0009765)	38	0.58065	1.75897	0.00447761	0.0958876
MF: RNA POLYMERASE III ACTIVITY (GO:0001056)	39	0.58218	1.76061	0.00617284	0.0962701
MF: ADENYL-NUCLEOTIDE EXCHANGE FACTOR ACTIVITY (GO:0000774)	12	0.767356	1.76367	0.0017331	0.0976024
BP: HEAT ACCLIMATION (GO:0010286)	51	0.545693	1.7528	0.00146843	0.101155
CC: PHOTOSYSTEM I REACTION CENTER (GO:0009538)	21	0.655675	1.7482	0.00505902	0.104919
BP: XYLOGLUCAN METABOLIC PROCESS (GO:0010411)	49	0.555259	1.74261	0.00149925	0.110362
BP: UROGENITAL SYSTEM DEVELOPMENT (GO:0001655)	12	0.75476	1.73761	0.00175439	0.11275
CC: PLASTOGLOBULE (GO:0010287)	81	0.495087	1.73804	0	0.114606
CC: PHOTOSYSTEM II OXYGEN EVOLVING COMPLEX (GO:0009654)	63	0.523322	1.73477	0.00151976	0.114732
MF: ADP-RIBOSE PYROPHOSPHOHYDROLASE ACTIVITY (GO:0080041)	17	0.667438	1.72878	0.00340715	0.120959
BP: PROTEIN PEPTIDYL-PROLYL ISOMERIZATION (GO:0000413)	80	0.501644	1.72494	0	0.124503
BP: EMBRYO DEVELOPMENT ENDING IN BIRTH OR EGG HATCHING (GO:0009792)	15	0.701695	1.7203	0.0101523	0.129465
MF: RNA POLYMERASE II COMPLEX BINDING (GO:0000993)	20	0.656272	1.71662	0.00326797	0.132267
MF: THIAMINE PYROPHOSPHATE BINDING (GO:0030976)	44	0.543394	1.70451	0.00472441	0.145026
BP: POSITIVE REGULATION OF SUPEROXIDE DISMUTASE ACTIVITY (GO:1901671)	16	0.679203	1.70593	0.0100503	0.145235
BP: PROTEIN SUMOYLATION (GO:0016925)	46	0.554068	1.70742	0.00321027	0.145593
BP: CELLULAR RESPONSE TO TOPOLOGICALLY INCORRECT PROTEIN (GO:0035967)	25	0.61257	1.69938	0	0.148388
MF: 2-ALKENAL REDUCTASE [NAD(P)+] ACTIVITY (GO:0032440)	30	0.598027	1.7	0.00159236	0.150274
BP: CARBON FIXATION (GO:0015977)	39	0.562595	1.68673	0.00941915	0.166437
MF: PROTEIN TAG (GO:0031386)	39	0.558929	1.6874	0.00152439	0.168156
BP: RESPONSE TO ABIOTIC STIMULUS (GO:0009628)	493	0.401442	1.67924	0	0.178278
BP: RESPONSE TO INORGANIC SUBSTANCE (GO:0010035)	222	0.427117	1.67481	0	0.184924
BP: REMOVAL OF SUPEROXIDE RADICALS (GO:0019430)	33	0.560275	1.66205	0.00770416	0.190507
MF: NAD(P)H DEHYDROGENASE (QUINONE) ACTIVITY (GO:0003955)	21	0.622117	1.66689	0.0130081	0.191474
MF: TRIOSE-PHOSPHATE ISOMERASE ACTIVITY (GO:0004807)	17	0.651319	1.66265	0.0114943	0.192173
MF: GLYOXALASE III ACTIVITY (GO:0019172)	28	0.593632	1.66377	0.00775194	0.192942
MF: OXIDOREDUCTASE ACTIVITY, ACTING ON CH-OH GROUP OF DONORS (GO:0016614)	46	0.527864	1.66484	0.00764526	0.193315
MF: GDP-D-GLUCOSE PHOSPHORYLASE ACTIVITY (GO:0080048)	19	0.639596	1.65685	0.00815661	0.193737
MF: PROTEIN-DISULFIDE REDUCTASE ACTIVITY (GO:0047134)	36	0.558472	1.66719	0.00924499	0.193899
BP: RESPONSE TO UNFOLDED PROTEIN (GO:0006986)	21	0.623538	1.6685	0.0112721	0.194441
CC: INTRINSIC COMPONENT OF PLASMA MEMBRANE (GO:0031226)	49	0.519266	1.65854	0.00740741	0.195222
CC: OXOGLUTARATE DEHYDROGENASE COMPLEX (GO:0045252)	24	0.605097	1.65718	0.00802568	0.195879
BP: CELLULAR RESPONSE TO MISFOLDED PROTEIN (GO:0071218)	19	0.645149	1.65227	0.00324149	0.200477
BP: CELLULAR COPPER ION HOMEOSTASIS (GO:0006878)	11	0.722951	1.64328	0.00526316	0.206495
MF: XYLOGLUCAN:XYLOGLUCOSYL TRANSFERASE ACTIVITY (GO:0016762)	52	0.507625	1.64131	0.00595238	0.207854
BP: PROTEIN-CONTAINING COMPLEX ASSEMBLY (GO:0065003)	132	0.447353	1.64748	0.00131926	0.208306
BP: GIBBERELLIN METABOLIC PROCESS (GO:0009685)	10	0.739783	1.64333	0.0102916	0.209253
BP: FORMATE CATABOLIC PROCESS (GO:0042183)	11	0.720172	1.63894	0.0104712	0.210534
BP: LACTATE BIOSYNTHETIC PROCESS (GO:0019249)	27	0.577874	1.64353	0.022293	0.211798
BP: REGULATION OF PROTEOLYSIS (GO:0030162)	73	0.478713	1.63654	0.00578035	0.213756
BP: PROTEIN QUALITY CONTROL FOR MISFOLDED OR INCOMPLETELY SYNTHESIZED PROTEINS (GO:0006515)	21	0.624325	1.64391	0.00991735	0.214001
CC: ANCHORED COMPONENT OF MEMBRANE (GO:0031225)	90	0.469292	1.63256	0.00408719	0.21449
BP: RESPONSE TO ENDOPLASMIC RETICULUM STRESS (GO:0034976)	108	0.450442	1.63111	0.0013245	0.214751
BP: FRUCTOSE 1,6-BISPHOSPHATE METABOLIC PROCESS (GO:0030388)	15	0.674993	1.63301	0.00970874	0.216317
BP: HISTONE DEUBIQUITINATION (GO:0016578)	19	0.62999	1.6341	0.0128411	0.216644
CC: CHLOROPLAST THYLAKOID MEMBRANE (GO:0009535)	324	0.403398	1.6261	0	0.223215
MF: FORMATE DEHYDROGENASE (NAD+) ACTIVITY (GO:0008863)	11	0.720172	1.62207	0.0149254	0.230433
MF: RNA POLYMERASE II CTD HEPTAPEPTIDE REPEAT KINASE ACTIVITY (GO:0008353)	33	0.549832	1.61709	0.00463679	0.237164
MF: NAD-DEPENDENT HISTONE DEACETYLASE ACTIVITY (H3-K14 SPECIFIC) (GO:0032041)	24	0.591401	1.61745	0.0128824	0.239204
BP: CATION TRANSPORT (GO:0006812)	25	0.586019	1.61022	0.00811688	0.245
MF: LIPID BINDING (GO:0008289)	359	0.396371	1.61123	0	0.24539
MF: NICOTIANAMINE SYNTHASE ACTIVITY (GO:0030410)	10	0.720827	1.61243	0.0201342	0.245551
CC: NUCLEOSOME (GO:0000786)	566	-0.570457	-2.78671	0	0
MF: SERINE-TYPE ENDOPEPTIDASE INHIBITOR ACTIVITY (GO:0004867)	191	-0.623688	-2.76205	0	0
MF: PROTEIN HETERODIMERIZATION ACTIVITY (GO:0046982)	681	-0.493587	-2.41332	0	0
BP: NUCLEOSOME ASSEMBLY (GO:0006334)	263	-0.509682	-2.29847	0	0
BP: NEGATIVE REGULATION OF ENDOPEPTIDASE ACTIVITY (GO:0010951)	125	-0.548039	-2.25147	0	0
BP: GLUTAMINE METABOLIC PROCESS (GO:0006541)	88	-0.555561	-2.15685	0	0.004013
MF: TOXIN ACTIVITY (GO:0090729)	16	-0.798367	-2.13222	0	0.00615786
BP: POLYSACCHARIDE CATABOLIC PROCESS (GO:0000272)	72	-0.552659	-2.10188	0	0.00886633
BP: AMYLOPECTIN BIOSYNTHETIC PROCESS (GO:0010021)	23	-0.704897	-2.08512	0	0.00955168
BP: UDP-L-ARABINOSE METABOLIC PROCESS (GO:0033356)	15	-0.784389	-2.07378	0	0.0109919
BP: GLYCOGEN METABOLIC PROCESS (GO:0005977)	20	-0.711338	-2.06306	0	0.0115873
MF: BETA-AMYLASE ACTIVITY (GO:0016161)	70	-0.553047	-2.0495	0	0.013655
MF: ASPARAGINE SYNTHASE (GLUTAMINE-HYDROLYZING) ACTIVITY (GO:0004066)	35	-0.618386	-2.0231	0	0.0196284
MF: 4-ALPHA-GLUCANOTRANSFERASE ACTIVITY (GO:0004134)	10	-0.821429	-1.94335	0	0.0534432
CC: CHLOROPLAST ISOAMYLASE COMPLEX (GO:0010368)	15	-0.755146	-1.93767	0	0.0537832
BP: D-XYLOSE METABOLIC PROCESS (GO:0042732)	31	-0.611248	-1.92854	0	0.0553585
BP: HEPARAN SULFATE PROTEOGLYCAN BIOSYNTHETIC PROCESS (GO:0015012)	15	-0.722916	-1.93164	0	0.0556316
MF: GLUCOSE-1-PHOSPHATE ADENYLYLTRANSFERASE ACTIVITY (GO:0008878)	48	-0.549504	-1.9442	0	0.0566728
CC: MCM COMPLEX (GO:0042555)	32	-0.612088	-1.89648	0.00292398	0.0579091
BP: SOMATIC CELL DNA RECOMBINATION (GO:0016444)	14	-0.747038	-1.90226	0.00251256	0.0579935
BP: POSITIVE REGULATION OF TRANSLATION (GO:0045727)	32	-0.600037	-1.91003	0	0.0582715
MF: LEUCINE-TRNA LIGASE ACTIVITY (GO:0004823)	14	-0.735311	-1.9209	0	0.0585571
MF: DNA HELICASE ACTIVITY (GO:0003678)	96	-0.472194	-1.89846	0	0.0587496
BP: REGULATION OF MITOTIC SPINDLE ORGANIZATION (GO:0060236)	16	-0.70281	-1.89148	0.00481928	0.0592671
MF: AMP DEAMINASE ACTIVITY (GO:0003876)	21	-0.67388	-1.9457	0	0.0596405
MF: BETA-GLUCOSIDASE ACTIVITY (GO:0008422)	40	-0.561295	-1.903	0	0.059762
BP: ACTIVATION OF PROTEIN KINASE ACTIVITY (GO:0032147)	20	-0.640462	-1.88649	0	0.0606464
MF: CHITIN BINDING (GO:0008061)	52	-0.535027	-1.91029	0	0.0606902
MF: ISOAMYLASE ACTIVITY (GO:0019156)	18	-0.687253	-1.90307	0	0.062252
BP: ASPARAGINE BIOSYNTHETIC PROCESS (GO:0006529)	30	-0.60317	-1.91158	0.00269542	0.0624429
BP: LEUCYL-TRNA AMINOACYLATION (GO:0006429)	14	-0.735311	-1.86842	0.00235294	0.0732782
MF: L-ISOLEUCINE TRANSAMINASE ACTIVITY (GO:0052656)	14	-0.714193	-1.8477	0	0.0761645
BP: GLYCOSYL COMPOUND METABOLIC PROCESS (GO:1901657)	65	-0.49264	-1.84948	0	0.0766495
BP: CAROTENOID BIOSYNTHETIC PROCESS (GO:0016117)	56	-0.511743	-1.8516	0	0.0769867
MF: L-LEUCINE TRANSAMINASE ACTIVITY (GO:0052654)	14	-0.714193	-1.8442	0.00249377	0.0770234
BP: REGULATION OF G2/M TRANSITION OF MITOTIC CELL CYCLE (GO:0010389)	18	-0.671724	-1.8552	0.00232019	0.0781091
MF: L-VALINE TRANSAMINASE ACTIVITY (GO:0052655)	14	-0.714193	-1.85204	0	0.0787523
BP: DETECTION OF BIOTIC STIMULUS (GO:0009595)	19	-0.64869	-1.85957	0	0.0788626
MF: 5'-3' EXONUCLEASE ACTIVITY (GO:0008409)	14	-0.70915	-1.83702	0.00485437	0.0789796
MF: OXIDOREDUCTASE ACTIVITY, ACTING ON THE ALDEHYDE OR OXO GROUP OF DONORS, DISULFIDE AS ACCEPTOR (GO:0016624)	11	-0.759028	-1.83928	0.00249377	0.0790134
MF: OXIDOREDUCTASE ACTIVITY, ACTING ON PAIRED DONORS, WITH OXIDATION OF A PAIR OF DONORS RESULTING IN THE REDUCTION OF MOLECULAR OXYGEN TO TWO MOLECULES OF WATER (GO:0016717)	38	-0.561024	-1.85623	0.00289017	0.0799066
CC: TRANSCRIPTIONALLY ACTIVE CHROMATIN (GO:0035327)	15	-0.702729	-1.83307	0.00242131	0.0802375
BP: CELL WALL MACROMOLECULE CATABOLIC PROCESS (GO:0016998)	46	-0.531258	-1.82543	0.00630915	0.0832446
BP: GLYCINE BIOSYNTHETIC PROCESS (GO:0006545)	10	-0.777694	-1.82309	0.004914	0.0836849
BP: S-ADENOSYLMETHIONINAMINE BIOSYNTHETIC PROCESS (GO:0006557)	12	-0.743693	-1.8204	0.00261097	0.0838304
CC: NUCLEAR NUCLEOSOME (GO:0000788)	13	-0.714355	-1.81562	0.00921659	0.084765
BP: SPERMINE BIOSYNTHETIC PROCESS (GO:0006597)	13	-0.705017	-1.8172	0.00492611	0.0850982
CC: STROMULE (GO:0010319)	52	-0.51625	-1.82545	0	0.0851499
BP: DNA REPLICATION, REMOVAL OF RNA PRIMER (GO:0043137)	10	-0.766195	-1.80468	0.00248756	0.0915228
BP: PLASTID TRANSCRIPTION (GO:0042793)	53	-0.501306	-1.80557	0.00308642	0.092282
BP: CHITIN CATABOLIC PROCESS (GO:0006032)	56	-0.493343	-1.79283	0	0.0967186
BP: ROOT MERISTEM GROWTH (GO:0010449)	14	-0.68269	-1.79357	0.00506329	0.0978577
BP: MITOTIC SISTER CHROMATID COHESION (GO:0007064)	41	-0.532733	-1.79494	0.00282486	0.0979263
MF: RRNA N-GLYCOSYLASE ACTIVITY (GO:0030598)	41	-0.529984	-1.79657	0.00273224	0.098314
MF: CHITINASE ACTIVITY (GO:0004568)	56	-0.493343	-1.77274	0.00314465	0.111708
MF: MOLYBDENUM ION BINDING (GO:0030151)	33	-0.543671	-1.77747	0.00552486	0.111769
BP: STEROID METABOLIC PROCESS (GO:0008202)	17	-0.650998	-1.77483	0.00238663	0.112936
MF: FRUCTOKINASE ACTIVITY (GO:0008865)	11	-0.708452	-1.77311	0.00947867	0.113274
BP: RESPONSE TO WOUNDING (GO:0009611)	188	-0.40611	-1.76115	0	0.121439
CC: SPINDLE (GO:0005819)	48	-0.50536	-1.76243	0.00280112	0.121985
MF: ADENOSYLMETHIONINE DECARBOXYLASE ACTIVITY (GO:0004014)	13	-0.705017	-1.75795	0.00493827	0.123047
BP: 'DE NOVO' PYRIMIDINE NUCLEOBASE BIOSYNTHETIC PROCESS (GO:0006207)	36	-0.536833	-1.75072	0	0.126266
MF: INOSINE NUCLEOSIDASE ACTIVITY (GO:0047724)	10	-0.752022	-1.74599	0.00943396	0.126878
BP: PROTEIN PRENYLATION (GO:0018342)	11	-0.722554	-1.75087	0.00479616	0.127968
MF: SIGNAL RECOGNITION PARTICLE BINDING (GO:0005047)	16	-0.643564	-1.74616	0.0129199	0.128535
BP: REGULATION OF PROTEIN DEPHOSPHORYLATION (GO:0035304)	50	-0.494051	-1.75178	0	0.128609
MF: RIBONUCLEASE T2 ACTIVITY (GO:0033897)	23	-0.593999	-1.74221	0.00271739	0.129312
BP: UNSATURATED FATTY ACID BIOSYNTHETIC PROCESS (GO:0006636)	25	-0.576864	-1.74049	0.00268097	0.129332
MF: STARCH BINDING (GO:2001070)	56	-0.477684	-1.74636	0	0.130377
BP: SRP-DEPENDENT COTRANSLATIONAL PROTEIN TARGETING TO MEMBRANE (GO:0006614)	60	-0.477345	-1.73027	0.003125	0.131192
BP: HETEROCYCLE CATABOLIC PROCESS (GO:0046700)	56	-0.481761	-1.72809	0	0.132128
BP: FRUCTOSE 2,6-BISPHOSPHATE METABOLIC PROCESS (GO:0006003)	18	-0.619722	-1.73034	0.00775194	0.132827
CC: PHAGOPHORE ASSEMBLY SITE (GO:0000407)	16	-0.656109	-1.73079	0.00717703	0.134181
BP: CELLULAR NITROGEN COMPOUND CATABOLIC PROCESS (GO:0044270)	56	-0.481761	-1.73126	0	0.135452
MF: MAGNESIUM CHELATASE ACTIVITY (GO:0016851)	12	-0.710379	-1.7314	0.0091954	0.137234
BP: VESICLE FUSION (GO:0006906)	46	-0.494471	-1.73216	0.00576369	0.138293
CC: MRE11 COMPLEX (GO:0030870)	14	-0.654046	-1.71659	0.0160858	0.142316
BP: SPERMIDINE BIOSYNTHETIC PROCESS (GO:0008295)	24	-0.569324	-1.71902	0.00273973	0.142368
BP: GLYCOGEN BIOSYNTHETIC PROCESS (GO:0005978)	115	-0.420353	-1.71701	0	0.143576
BP: MALTOSE METABOLIC PROCESS (GO:0000023)	50	-0.479849	-1.70563	0.00588235	0.153334
MF: INOSITOL PENTAKISPHOSPHATE 2-KINASE ACTIVITY (GO:0035299)	10	-0.723303	-1.7059	0.00726392	0.154828
MF: 6-PHOSPHOFRUCTO-2-KINASE ACTIVITY (GO:0003873)	18	-0.619722	-1.70187	0.00763359	0.156787
MF: MRNA GUANYLYLTRANSFERASE ACTIVITY (GO:0004484)	19	-0.605451	-1.69517	0.00530504	0.162812
MF: DNA PRIMASE ACTIVITY (GO:0003896)	12	-0.669493	-1.69603	0.0175	0.163442
BP: NEGATIVE REGULATION OF TRANSLATION (GO:0017148)	99	-0.420902	-1.6928	0	0.164319
BP: ORGANIC CYCLIC COMPOUND CATABOLIC PROCESS (GO:1901361)	58	-0.469683	-1.69107	0.00301205	0.164913
MF: CLASS I DNA-(APURINIC OR APYRIMIDINIC SITE) ENDONUCLEASE ACTIVITY (GO:0140078)	10	-0.71943	-1.67853	0.0153453	0.165701
MF: ALPHA-1,4-GLUCAN SYNTHASE ACTIVITY (GO:0033201)	12	-0.681621	-1.68891	0.0171149	0.166283
CC: SIGNAL RECOGNITION PARTICLE, ENDOPLASMIC RETICULUM TARGETING (GO:0005786)	18	-0.605001	-1.67566	0.0205128	0.166702
MF: AMYLOPECTIN MALTOHYDROLASE ACTIVITY (GO:0102229)	21	-0.589627	-1.67884	0.0155039	0.167038
MF: PROTEASE BINDING (GO:0002020)	14	-0.651374	-1.68122	0.0126904	0.16733
BP: PROTEIN K63-LINKED DEUBIQUITINATION (GO:0070536)	17	-0.615974	-1.67375	0.0239234	0.167781
BP: 7-METHYLGUANOSINE MRNA CAPPING (GO:0006370)	23	-0.576654	-1.6822	0.0159151	0.167801
MF: 5'-FLAP ENDONUCLEASE ACTIVITY (GO:0017108)	11	-0.705397	-1.67587	0.0190931	0.16807
MF: XYLOSE ISOMERASE ACTIVITY (GO:0009045)	14	-0.648968	-1.67914	0.0167464	0.168361
MF: GLYCOGEN PHOSPHORYLASE ACTIVITY (GO:0008184)	15	-0.638753	-1.68278	0.0103627	0.168983
BP: IMP SALVAGE (GO:0032264)	24	-0.568874	-1.68314	0.00257732	0.170312
MF: SCOPOLIN BETA-GLUCOSIDASE ACTIVITY (GO:0102483)	29	-0.541203	-1.68464	0.0026738	0.170373
BP: ION HOMEOSTASIS (GO:0050801)	34	-0.504024	-1.66915	0.00571429	0.171435
BP: CDP-DIACYLGLYCEROL BIOSYNTHETIC PROCESS (GO:0016024)	21	-0.582919	-1.67008	0.0141176	0.171618
BP: INOSITOL PHOSPHATE DEPHOSPHORYLATION (GO:0046855)	26	-0.548289	-1.66336	0.0138122	0.172711
MF: ASPARTATE-TRNA LIGASE ACTIVITY (GO:0004815)	20	-0.586169	-1.66432	0.0075188	0.173098
BP: SALICYLIC ACID BIOSYNTHETIC PROCESS (GO:0009697)	36	-0.508789	-1.66606	0.0120482	0.17391
MF: POLYNUCLEOTIDE 5'-PHOSPHATASE ACTIVITY (GO:0004651)	17	-0.609526	-1.66482	0.0209424	0.174149
MF: GLUCOSE-6-PHOSPHATE DEHYDROGENASE ACTIVITY (GO:0004345)	22	-0.556896	-1.6573	0.00795756	0.177894
CC: INTEGRAL COMPONENT OF MITOCHONDRIAL OUTER MEMBRANE (GO:0031307)	21	-0.579391	-1.65773	0.0134771	0.178939
BP: PLASTID TRANSLATION (GO:0032544)	19	-0.594402	-1.65471	0.0151133	0.179991
MF: DIHYDRONEOPTERIN ALDOLASE ACTIVITY (GO:0004150)	13	-0.651127	-1.65111	0.0169082	0.180308
BP: CELL PLATE ASSEMBLY (GO:0000919)	22	-0.579868	-1.65179	0.0136986	0.18103
MF: DNA-DIRECTED DNA POLYMERASE ACTIVITY (GO:0003887)	73	-0.434895	-1.65227	0.00671141	0.181979
CC: TRANSCRIPTION REGULATOR COMPLEX (GO:0044798)	24	-0.547485	-1.64844	0.0188679	0.18291
BP: RESPONSE TO CHITIN (GO:0010200)	45	-0.477298	-1.64589	0	0.185167
BP: KILLING OF CELLS OF OTHER ORGANISM (GO:0031640)	21	-0.56474	-1.64308	0.0133333	0.18757
CC: AMYLOPLAST (GO:0009501)	114	-0.403358	-1.63618	0.0037594	0.196686
CC: MONOLAYER-SURROUNDED LIPID STORAGE BODY (GO:0012511)	28	-0.529839	-1.63202	0.0105263	0.198104
BP: STARCH BIOSYNTHETIC PROCESS (GO:0019252)	205	-0.368816	-1.63313	0	0.198165
BP: ASPARTYL-TRNA AMINOACYLATION (GO:0006422)	20	-0.586169	-1.63421	0.0125628	0.198212
MF: TERPENE SYNTHASE ACTIVITY (GO:0010333)	25	-0.54528	-1.62666	0.015748	0.19869
BP: AROMATIC COMPOUND CATABOLIC PROCESS (GO:0019439)	58	-0.44481	-1.62512	0.0084507	0.199377
BP: PYRIMIDINE-CONTAINING COMPOUND METABOLIC PROCESS (GO:0072527)	15	-0.611371	-1.6277	0.0357143	0.20009
BP: MALE MEIOTIC NUCLEAR DIVISION (GO:0007140)	31	-0.515496	-1.62667	0.015748	0.200322
BP: PURINE NUCLEOSIDE CATABOLIC PROCESS (GO:0006152)	20	-0.57362	-1.62845	0.0308483	0.200533
BP: UDP-GLUCOSE METABOLIC PROCESS (GO:0006011)	25	-0.542637	-1.62853	0.0131926	0.202127
BP: DNA REPLICATION INITIATION (GO:0006270)	48	-0.449991	-1.62189	0.00890208	0.203065
BP: DOUBLE-STRAND BREAK REPAIR VIA HOMOLOGOUS RECOMBINATION (GO:0000724)	64	-0.438376	-1.62072	0.00874636	0.20363
MF: PROTEIN HISTIDINE KINASE BINDING (GO:0043424)	49	-0.466294	-1.61664	0.0229226	0.208628
BP: HISTONE EXCHANGE (GO:0043486)	15	-0.61465	-1.612	0.0121655	0.209195
MF: BETA-GALACTOSIDASE ACTIVITY (GO:0004565)	45	-0.463537	-1.61249	0.0173913	0.210123
MF: STARCH SYNTHASE ACTIVITY (GO:0009011)	13	-0.630155	-1.6144	0.030303	0.210454
BP: PLANT-TYPE CELL WALL BIOGENESIS (GO:0009832)	46	-0.458992	-1.61281	0.0117302	0.211226
MF: FERROCHELATASE ACTIVITY (GO:0004325)	10	-0.661609	-1.6056	0.0356234	0.217667
BP: RESPONSE TO BLUE LIGHT (GO:0009637)	51	-0.463473	-1.60346	0.00983607	0.217957
MF: RNA-DIRECTED 5'-3' RNA POLYMERASE ACTIVITY (GO:0003968)	27	-0.519269	-1.60454	0.0133333	0.217992
MF: SUCCINATE DEHYDROGENASE (UBIQUINONE) ACTIVITY (GO:0008177)	21	-0.550588	-1.59891	0.0287958	0.220787
BP: REGULATION OF INTRACELLULAR TRANSPORT (GO:0032386)	22	-0.553486	-1.59992	0.035533	0.220882
CC: KINETOCHORE MICROTUBULE (GO:0005828)	11	-0.682018	-1.60077	0.0322581	0.221217
BP: TETRAHYDROFOLATE BIOSYNTHETIC PROCESS (GO:0046654)	24	-0.525649	-1.59546	0.0271739	0.224953
MF: QUINONE BINDING (GO:0048038)	34	-0.495251	-1.59316	0.0166667	0.227066
BP: PURINE-CONTAINING COMPOUND METABOLIC PROCESS (GO:0072521)	27	-0.524384	-1.58417	0.0238727	0.232277
BP: GLYCOSAMINOGLYCAN BIOSYNTHETIC PROCESS (GO:0006024)	32	-0.499312	-1.58626	0.0178571	0.233721
BP: GLUTAMINE BIOSYNTHETIC PROCESS (GO:0006542)	21	-0.537677	-1.5852	0.0189702	0.23387
BP: NUCLEOBASE-CONTAINING SMALL MOLECULE METABOLIC PROCESS (GO:0055086)	44	-0.454679	-1.58417	0.0115942	0.233901
MF: EXORIBONUCLEASE ACTIVITY (GO:0004532)	11	-0.668002	-1.58676	0.0293399	0.234517
CC: SMC5-SMC6 COMPLEX (GO:0030915)	30	-0.497186	-1.58676	0.0179949	0.236204
BP: RESPONSE TO FAR RED LIGHT (GO:0010218)	45	-0.457376	-1.57773	0.00892857	0.241999
BP: GLUCOSE IMPORT (GO:0046323)	35	-0.476022	-1.57454	0.0127551	0.24238
CC: NUCLEAR HETEROCHROMATIN (GO:0005720)	13	-0.618951	-1.57306	0.0456621	0.243257
MF: GLUTAMATE-AMMONIA LIGASE ACTIVITY (GO:0004356)	21	-0.537677	-1.57472	0.045584	0.243763
BP: NITRATE ASSIMILATION (GO:0042128)	13	-0.622433	-1.57557	0.0432692	0.24385
MF: AU-RICH ELEMENT BINDING (GO:0017091)	12	-0.624115	-1.56994	0.0306905	0.247528
MF: OXIDOREDUCTASE ACTIVITY, ACTING ON PAIRED DONORS, WITH INCORPORATION OR REDUCTION OF MOLECULAR OXYGEN, NAD(P)H AS ONE DONOR, AND INCORPORATION OF ONE ATOM OF OXYGEN (GO:0016709)	42	-0.462331	-1.56645	0.0121581	0.247646
CC: TRANSCRIPTION REGULATOR COMPLEX (GO:0005667)	82	-0.402745	-1.56524	0.00706714	0.248144
BP: CELLULAR CHEMICAL HOMEOSTASIS (GO:0055082)	16	-0.579784	-1.56705	0.0384615	0.248278
MF: COBALT ION BINDING (GO:0050897)	82	-0.405036	-1.56762	0	0.24876
BP: NUCLEOBASE-CONTAINING COMPOUND CATABOLIC PROCESS (GO:0034655)	46	-0.453508	-1.56825	0.00623053	0.249183

## Sheet: Table S3
Supplementary Table S3: Differentially enriched GO terms in Z168N vs. Z168
NAME	SIZE	ES	NES	NOM p-val	FDR q-val
MF: HSP90 PROTEIN BINDING (GO:0051879)	28	0.81495	3.3151	0	0
MF: CHAPERONE BINDING (GO:0051087)	118	0.527117	2.79369	0	0
BP: PHOTOSYNTHESIS, LIGHT HARVESTING IN PHOTOSYSTEM I (GO:0009768)	24	0.720348	2.71368	0	0
MF: PREPROTEIN BINDING (GO:0070678)	13	0.863028	2.70431	0	0
BP: RESPONSE TO HEAT (GO:0009408)	255	0.501474	2.66434	0	0.000433193
BP: REGULATION OF RNA SPLICING (GO:0043484)	25	0.642185	2.55533	0	0.00107201
MF: PROTEIN TRANSMEMBRANE TRANSPORTER ACTIVITY (GO:0015266)	29	0.591674	2.35009	0	0.0067655
BP: RESPONSE TO HIGH LIGHT INTENSITY (GO:0009644)	119	0.429459	2.24613	0	0.0147017
BP: CELLULAR RESPONSE TO HEAT (GO:0034605)	45	0.482671	2.1145	0	0.0331602
MF: RNA POLYMERASE II TRANSCRIPTION FACTOR BINDING (GO:0001085)	27	0.533162	2.1187	0	0.0348052
BP: CHAPERONE-MEDIATED PROTEIN COMPLEX ASSEMBLY (GO:0051131)	20	0.571026	2.09349	0	0.0366319
BP: PROTEIN COMPLEX OLIGOMERIZATION (GO:0051259)	60	0.449306	2.07125	0	0.036962
BP: RESPONSE TO TEMPERATURE STIMULUS (GO:0009266)	234	0.33421	2.12495	0	0.0373073
BP: PROTEIN REFOLDING (GO:0042026)	45	0.439516	2.05102	0	0.0381956
MF: RIBULOSE-BISPHOSPHATE CARBOXYLASE ACTIVITY (GO:0016984)	21	0.573829	2.0757	0	0.0385218
BP: REGULATION OF PROTEIN STABILITY (GO:0031647)	32	0.466333	2.05519	0	0.0394895
BP: RESPONSE TO REACTIVE OXYGEN SPECIES (GO:0000302)	67	0.437122	2.03038	0	0.0417019
CC: TIM23 MITOCHONDRIAL IMPORT INNER MEMBRANE TRANSLOCASE COMPLEX (GO:0005744)	61	0.411484	1.98786	0	0.0494906
BP: PROTEIN STABILIZATION (GO:0050821)	43	0.460653	1.9937	0	0.0507405
CC: PHOTOSYSTEM II (GO:0009523)	72	0.372435	1.89472	0	0.0880473
BP: ORGANIC ACID TRANSMEMBRANE TRANSPORT (GO:1903825)	10	0.630737	1.87276	0.00985222	0.0964754
CC: INTEGRAL COMPONENT OF MITOCHONDRIAL INNER MEMBRANE (GO:0031305)	58	0.400133	1.86286	0	0.0983986
MF: SIGNALING RECEPTOR ACTIVITY (GO:0004872)	15	0.547498	1.84508	0	0.10438
BP: ORGANIC ANION TRANSPORT (GO:0015711)	11	0.574128	1.8107	0.00581395	0.118134
BP: FORMATE CATABOLIC PROCESS (GO:0042183)	11	0.571234	1.81451	0.011236	0.119996
BP: COENZYME A METABOLIC PROCESS (GO:0015936)	13	0.530511	1.8002	0.0185185	0.120856
BP: LACTATE BIOSYNTHETIC PROCESS (GO:0019249)	27	0.427669	1.79273	0.011236	0.121616
CC: INTRINSIC COMPONENT OF MITOCHONDRIAL MEMBRANE (GO:0098573)	11	0.575059	1.7834	0.0172414	0.123532
MF: ORGANIC ACID TRANSMEMBRANE TRANSPORTER ACTIVITY (GO:0005342)	11	0.576111	1.76871	0.0180723	0.130413
BP: L-ALANINE CATABOLIC PROCESS (GO:0042853)	12	0.544957	1.75404	0.013245	0.133309
CC: INTEGRAL COMPONENT OF MITOCHONDRIAL MEMBRANE (GO:0032592)	11	0.575059	1.75664	0.0206186	0.135799
MF: FORMATE DEHYDROGENASE (NAD+) ACTIVITY (GO:0008863)	11	0.571234	1.72548	0.0192308	0.148758
CC: INTRINSIC COMPONENT OF MITOCHONDRIAL INNER MEMBRANE (GO:0031304)	11	0.575059	1.70003	0.0165746	0.149196
BP: MITOCHONDRIAL CALCIUM ION HOMEOSTASIS (GO:0051560)	10	0.5748	1.72976	0.0246305	0.149985
BP: METHIONINE METABOLIC PROCESS (GO:0006555)	13	0.533654	1.71287	0.0308642	0.150694
MF: FK506 BINDING (GO:0005528)	34	0.392558	1.69274	0.0142857	0.150711
BP: REGULATION OF SALICYLIC ACID MEDIATED SIGNALING PATHWAY (GO:2000031)	10	0.562426	1.71677	0.0285714	0.151548
MF: GLYOXALASE III ACTIVITY (GO:0019172)	28	0.416646	1.68209	0.0116279	0.151999
MF: CHLOROPHYLL BINDING (GO:0016168)	69	0.374337	1.7059	0	0.152043
MF: 1-AMINOCYCLOPROPANE-1-CARBOXYLATE SYNTHASE ACTIVITY (GO:0016847)	16	0.502257	1.70046	0	0.152818
MF: ACID-AMINO ACID LIGASE ACTIVITY (GO:0016881)	10	0.572405	1.68335	0.0380435	0.154764
BP: PROTEIN HOMOOLIGOMERIZATION (GO:0051260)	47	0.365239	1.6676	0	0.156718
BP: PROTEIN IMPORT INTO MITOCHONDRIAL MATRIX (GO:0030150)	82	0.319156	1.6705	0	0.158346
MF: ATPASE ACTIVATOR ACTIVITY (GO:0001671)	26	0.412916	1.64601	0.00775194	0.172034
BP: RESPONSE TO HYDROGEN PEROXIDE (GO:0042542)	144	0.320002	1.6244	0	0.185916
BP: GLUTAMATE METABOLIC PROCESS (GO:0006536)	13	0.487304	1.62592	0.0306748	0.188338
CC: PHOTOSYSTEM I (GO:0009522)	76	0.335002	1.61059	0	0.194986
BP: CELLULAR RESPONSE TO HYDROGEN PEROXIDE (GO:0070301)	17	0.45373	1.58306	0.0465116	0.216209
BP: REGULATION OF TRANSCRIPTION FROM RNA POLYMERASE II PROMOTER IN RESPONSE TO STRESS (GO:0043618)	17	0.457625	1.58372	0.031746	0.219788
BP: RESPONSE TO UNFOLDED PROTEIN (GO:0006986)	21	0.407882	1.56834	0.0254237	0.228036
MF: 2-ALKENAL REDUCTASE [NAD(P)+] ACTIVITY (GO:0032440)	30	0.375327	1.54921	0.0121951	0.246683
CC: MCM COMPLEX (GO:0042555)	32	-0.667266	-1.97603	0	0.00779667
BP: DNA REPLICATION INITIATION (GO:0006270)	48	-0.618696	-1.96186	0	0.00824309
MF: DNA HELICASE ACTIVITY (GO:0003678)	96	-0.551436	-1.89061	0	0.0311101
MF: 4-ALPHA-GLUCANOTRANSFERASE ACTIVITY (GO:0004134)	10	-0.80529	-1.85557	0.00123153	0.0534273
MF: ION CHANNEL ACTIVITY (GO:0005216)	32	-0.62021	-1.80783	0	0.110492
MF: CYTIDYLATE KINASE ACTIVITY (GO:0004127)	15	-0.701732	-1.77359	0.00236127	0.148174
BP: NITRATE ASSIMILATION (GO:0042128)	13	-0.711358	-1.78113	0	0.156462
CC: COPI VESICLE COAT (GO:0030126)	70	-0.532819	-1.77361	0	0.160522
MF: URIDYLATE KINASE ACTIVITY (GO:0009041)	15	-0.701732	-1.75629	0.002331	0.17642
MF: LIGAND-GATED ION CHANNEL ACTIVITY (GO:0015276)	21	-0.615038	-1.72278	0	0.242846
MF: PYRIMIDINE NUCLEOTIDE-SUGAR TRANSMEMBRANE TRANSPORTER ACTIVITY (GO:0015165)	18	-0.645225	-1.72765	0	0.24337
CC: RNA POLYMERASE II, HOLOENZYME (GO:0016591)	32	-0.575855	-1.7171	0.00108225	0.247534

## Sheet: Table S4
Supplementary Table S4: Differentially enriched GO terms in Y13N vs. Y13
NAME	SIZE	ES	NES	NOM p-val	FDR q-val
MF: ALPHA-1,4-GLUCAN SYNTHASE ACTIVITY (GO:0033201)	12	0.745385	2.06989	0.00373134	0.0943052
BP: DEADENYLATION-INDEPENDENT DECAPPING OF NUCLEAR-TRANSCRIBED MRNA (GO:0031087)	22	0.640792	2.04404	0	0.103148
MF: STARCH SYNTHASE ACTIVITY (GO:0009011)	13	0.722746	2.09564	0.00381679	0.107498
BP: NADH METABOLIC PROCESS (GO:0006734)	13	0.718756	2.07455	0	0.108091
BP: PHOTOSYNTHETIC ELECTRON TRANSPORT IN PHOTOSYSTEM II (GO:0009772)	15	0.706943	2.02586	0	0.111957
MF: PHOSPHATIDYLINOSITOL PHOSPHATE KINASE ACTIVITY (GO:0016307)	57	0.505309	1.99894	0	0.118219
BP: ACTIN NUCLEATION (GO:0045010)	52	0.502879	2.0062	0	0.122875
MF: MRNA GUANYLYLTRANSFERASE ACTIVITY (GO:0004484)	19	0.663009	2.09946	0	0.134849
BP: 7-METHYLGUANOSINE MRNA CAPPING (GO:0006370)	23	0.660276	2.12947	0	0.136823
BP: MIRNA CATABOLIC PROCESS (GO:0010587)	10	0.840169	2.15884	0	0.188917
MF: GLYCOGEN PHOSPHORYLASE ACTIVITY (GO:0008184)	15	0.664846	1.9365	0	0.190899
BP: REGULATION OF ANION TRANSMEMBRANE TRANSPORT (GO:1903959)	25	0.564817	1.89048	0	0.219856
CC: CYTOPLASMIC RIBONUCLEOPROTEIN GRANULE (GO:0036464)	17	0.58031	1.78551	0	0.225746
MF: NUTRIENT RESERVOIR ACTIVITY (GO:0045735)	471	0.340363	1.77619	0	0.226982
BP: L-ALANINE CATABOLIC PROCESS (GO:0042853)	12	0.653754	1.7884	0.0243902	0.228283
CC: THO COMPLEX (GO:0000347)	36	0.478278	1.77788	0	0.231627
BP: NADP METABOLIC PROCESS (GO:0006739)	14	0.617655	1.79048	0.0104167	0.232555
MF: ELECTRON TRANSPORTER, TRANSFERRING ELECTRONS WITHIN THE CYCLIC ELECTRON TRANSPORT PATHWAY OF PHOTOSYNTHESIS ACTIVITY (GO:0045156)	11	0.707988	1.87416	0.00657895	0.235147
BP: CELL ADHESION (GO:0007155)	53	0.461202	1.89118	0.00621118	0.235228
BP: GLYOXYLATE CYCLE (GO:0006097)	12	0.671793	1.83671	0.0103093	0.238412
MF: POLYNUCLEOTIDE 5'-PHOSPHATASE ACTIVITY (GO:0004651)	17	0.644886	1.89915	0.00396825	0.238768
BP: SCF COMPLEX ASSEMBLY (GO:0010265)	14	0.613526	1.8245	0.00381679	0.239021
BP: EMBRYONIC AXIS SPECIFICATION (GO:0000578)	11	0.676205	1.79067	0.0205479	0.240662
MF: PYRUVATE, PHOSPHATE DIKINASE ACTIVITY (GO:0050242)	13	0.664962	1.84237	0.0137457	0.240894
MF: L-ALANINE:2-OXOGLUTARATE AMINOTRANSFERASE ACTIVITY (GO:0004021)	14	0.6125	1.79189	0.0155642	0.246987
BP: N-GLYCAN PROCESSING (GO:0006491)	18	0.581958	1.84547	0.00732601	0.247724
BP: VESICLE-MEDIATED TRANSPORT BETWEEN ENDOSOMAL COMPARTMENTS (GO:0098927)	11	0.685098	1.82487	0.0103448	0.249704
MF: SERINE O-ACETYLTRANSFERASE ACTIVITY (GO:0009001)	11	-0.859164	-1.99778	0	0.0110874
BP: PROTEIN COMPLEX OLIGOMERIZATION (GO:0051259)	60	-0.610794	-1.98224	0	0.012225
CC: ANCHORED COMPONENT OF PLASMA MEMBRANE (GO:0046658)	121	-0.561822	-2.00653	0	0.0143227
MF: PURINE NUCLEOSIDE TRANSMEMBRANE TRANSPORTER ACTIVITY (GO:0015211)	23	-0.706849	-1.92424	0	0.0332665
MF: OXIDOREDUCTASE ACTIVITY, ACTING ON PAIRED DONORS, WITH INCORPORATION OR REDUCTION OF MOLECULAR OXYGEN, NAD(P)H AS ONE DONOR, AND INCORPORATION OF ONE ATOM OF OXYGEN (GO:0016709)	42	-0.62554	-1.9095	0	0.0368193
MF: UDP-GLYCOSYLTRANSFERASE ACTIVITY (GO:0008194)	196	-0.516542	-1.89624	0	0.0378935
BP: PROTEIN HOMOOLIGOMERIZATION (GO:0051260)	47	-0.611091	-1.90327	0	0.0380262
BP: LIPID TRANSPORT (GO:0006869)	193	-0.508962	-1.86026	0	0.0630246
MF: (1->3)-BETA-D-GLUCAN BINDING (GO:0001872)	11	-0.787161	-1.83056	0.00137363	0.0845012
MF: TRANSFERASE ACTIVITY, TRANSFERRING ACYL GROUPS OTHER THAN AMINO-ACYL GROUPS (GO:0016747)	274	-0.485257	-1.83377	0	0.0876781
MF: 5'-3' EXORIBONUCLEASE ACTIVITY (GO:0004534)	10	-0.808473	-1.80706	0.00141643	0.118427
BP: AMINO ACID TRANSPORT (GO:0006865)	14	-0.737159	-1.79431	0.00275862	0.13449
BP: RESPONSE TO SALICYLIC ACID (GO:0009751)	47	-0.56088	-1.77528	0	0.164737
BP: RESPONSE TO GIBBERELLIN (GO:0009739)	46	-0.566252	-1.76083	0	0.172304
CC: INTRINSIC COMPONENT OF PLASMA MEMBRANE (GO:0031226)	49	-0.559953	-1.75627	0	0.17233
BP: AUXIN HOMEOSTASIS (GO:0010252)	19	-0.67687	-1.76862	0.0013089	0.173045
BP: ORGANIC ANION TRANSPORT (GO:0015711)	11	-0.771742	-1.76281	0.00142248	0.176947
MF: MALATE DEHYDROGENASE (DECARBOXYLATING) (NADP+) ACTIVITY (GO:0004473)	12	-0.743464	-1.74461	0.00141443	0.183929
MF: GLYCOLIPID BINDING (GO:0051861)	17	-0.692251	-1.7471	0	0.187189
BP: PHOTOSYSTEM I ASSEMBLY (GO:0048564)	13	-0.727716	-1.72111	0.0055325	0.242696

## Sheet: Table S5
Supplementary Table S5: Differentially enriched Pfam in Z168N vs. Y13N
NAME	SIZE	ES	NES	NOM p-val	FDR q-val
PF00011.22:HSP20/ALPHA CRYSTALLIN FAMILY	107	0.878389	3.15948	0	0
PF17886.2:HSP20-LIKE DOMAIN FOUND IN ARSA	82	0.894553	3.08356	0	0
PF00012.21:HSP70 PROTEIN	61	0.72686	2.41008	0	0
PF00447.16:HSF-TYPE DNA-BINDING	41	0.785415	2.39753	0	0
PF06723.14:MREB/MBL PROTEIN	61	0.717519	2.37544	0	0
PF00504.22:CHLOROPHYLL A-B BINDING PROTEIN	59	0.722431	2.34414	0	0
PF00011.20:HSP20/ALPHA CRYSTALLIN FAMILY	40	0.741566	2.25271	0	0
PF13173.7:AAA DOMAIN	39	0.736532	2.22394	0	0
PF00012.19:HSP70 PROTEIN	66	0.662169	2.19709	0	9.1e-05
PF13589.5:HISTIDINE KINASE-, DNA GYRASE B-, AND HSP90-LIKE ATPASE	27	0.764915	2.12812	0	0.000149
PF00183.19:HSP90 PROTEIN	20	0.815424	2.13209	0	0.000164
PF00394.23:MULTICOPPER OXIDASE	31	0.721723	2.09975	0	0.000204
PF02179.17:BAG DOMAIN	35	0.689826	2.08569	0	0.000291
PF06723.12:MREB/MBL PROTEIN	48	0.668434	2.0871	0	0.000313
PF12775.8:P-LOOP CONTAINING DYNEIN MOTOR REGION	21	0.763987	2.06718	0	0.000664
PF00254.27:FKBP-TYPE PEPTIDYL-PROLYL CIS-TRANS ISOMERASE	26	0.749091	2.06833	0	0.000708
PF05621.12:BACTERIAL TNIB PROTEIN	29	0.711404	2.03562	0	0.000899
PF00101.21:RIBULOSE BISPHOSPHATE CARBOXYLASE, SMALL CHAIN	16	0.822827	2.0384	0	0.000947
PF04969.17:CS DOMAIN	21	0.760244	2.04235	0	0.000962
PF12338.9:RIBULOSE-1,5-BISPHOSPHATE CARBOXYLASE SMALL SUBUNIT	16	0.822827	2.03892	0	0.000999
PF07731.15:MULTICOPPER OXIDASE	34	0.668417	2.00847	0	0.00202719
PF02518.25:HISTIDINE KINASE-, DNA GYRASE B-, AND HSP90-LIKE ATPASE	37	0.658334	1.9921	0	0.00257068
PF14363.7:DOMAIN ASSOCIATED AT C-TERMINAL WITH AAA	32	0.677327	1.97951	0	0.00306284
PF00447.18:HSF-TYPE DNA-BINDING	57	0.604491	1.9719	0	0.00337792
PF02861.21:CLP AMINO TERMINAL DOMAIN, PATHOGENICITY ISLAND COMPONENT	30	0.689739	1.9637	0	0.00357266
PF07732.16:MULTICOPPER OXIDASE	34	0.668417	1.95279	0	0.00419699
PF01556.19:DNAJ C TERMINAL DOMAIN	45	0.62947	1.93588	0	0.00521582
PF00910.23:RNA HELICASE	59	0.580589	1.93655	0	0.00525718
PF13589.7:HISTIDINE KINASE-, DNA GYRASE B-, AND HSP90-LIKE ATPASE	62	0.591038	1.92464	0	0.00611652
PF00226.32:DNAJ DOMAIN	200	0.492613	1.90374	0	0.00880609
PF10431.10:C-TERMINAL, D2-SMALL DOMAIN, OF CLPB PROTEIN	45	0.609681	1.90006	0	0.00936827
PF02469.23:FASCICLIN DOMAIN	43	0.614617	1.89565	0	0.00976866
PF13181.5:TETRATRICOPEPTIDE REPEAT	82	0.538144	1.88647	0	0.0112627
PF13456.5:REVERSE TRANSCRIPTASE-LIKE	59	0.568045	1.87508	0	0.0135078
PF17871.2:AAA LID DOMAIN	36	0.646142	1.87313	0	0.0137345
PF00234.23:PROTEASE INHIBITOR/SEED STORAGE/LTP FAMILY	213	0.478017	1.86991	0	0.0137481
PF01661.20:MACRO DOMAIN	14	0.769968	1.87051	0	0.0139703
PF14368.7:PROBABLE LIPID TRANSFER	119	0.502602	1.83783	0	0.0230487
PF02536.13:MTERF	44	0.588521	1.83189	0	0.0243106
PF02434.17:FRINGE-LIKE	19	0.700251	1.81859	0	0.0290926
PF03595.18:VOLTAGE-DEPENDENT ANION CHANNEL	13	0.770026	1.81133	0.00167224	0.0317513
PF01428.17:AN1-LIKE ZINC FINGER	26	0.642836	1.80489	0	0.0343562
PF01695.18:ISTB-LIKE ATP BINDING PROTEIN	37	0.593037	1.79957	0	0.0362688
PF00158.27:SIGMA-54 INTERACTION DOMAIN	58	0.554702	1.79549	0	0.0379239
PF00262.17:CALRETICULIN FAMILY	11	0.77713	1.79302	0.00164745	0.0387983
PF03208.18:PRA1 FAMILY PROTEIN	13	0.741039	1.78021	0.00169779	0.0464858
PF13976.5:GAG-PRE-INTEGRASE DOMAIN	35	0.598016	1.76539	0.00291971	0.056117
PF08646.9:REPLICATION FACTOR-A C TERMINAL DOMAIN	20	0.672739	1.75218	0.00327869	0.062889
PF17830.2:STI1 DOMAIN	18	0.685277	1.75325	0.0016129	0.0631855
PF00226.30:DNAJ DOMAIN	91	0.494839	1.75472	0.0013624	0.0634071
PF14159.7:CAAD DOMAINS OF CYANOBACTERIAL AMINOACYL-TRNA SYNTHETASE	23	0.646801	1.74804	0.0015873	0.0647376
PF03358.16:NADPH-DEPENDENT FMN REDUCTASE	31	0.604859	1.74215	0.00482315	0.0673615
PF13716.5:DIVERGENT CRAL/TRIO DOMAIN	14	0.731233	1.73995	0.00522648	0.0681207
PF04398.13:PROTEIN OF UNKNOWN FUNCTION, DUF538	61	0.531973	1.73717	0	0.068123
PF00262.19:CALRETICULIN FAMILY	17	0.691583	1.7423	0.00637959	0.0685774
PF12076.9:WAX2 C-TERMINAL DOMAIN	15	0.703191	1.73762	0.00658979	0.0689289
PF02525.18:FLAVODOXIN-LIKE FOLD	31	0.604859	1.73457	0.00314465	0.0694652
PF04969.15:CS DOMAIN	14	0.719901	1.73122	0.00347826	0.0709639
PF00080.21:COPPER/ZINC SUPEROXIDE DISMUTASE (SODC)	11	0.760745	1.71804	0.00500835	0.0828632
PF01754.17:A20-LIKE ZINC FINGER	18	0.672692	1.70531	0.00671141	0.0958169
PF02797.16:CHALCONE AND STILBENE SYNTHASES, C-TERMINAL DOMAIN	34	0.567007	1.69086	0.00646204	0.103454
PF00254.29:FKBP-TYPE PEPTIDYL-PROLYL CIS-TRANS ISOMERASE	41	0.55637	1.69096	0.00449102	0.104881
PF08392.13:FAE1/TYPE III POLYKETIDE SYNTHASE-LIKE PROTEIN	34	0.567007	1.68772	0.00321027	0.105785
PF02536.15:MTERF	181	0.440074	1.69113	0	0.106391
PF08541.11:3-OXOACYL-[ACYL-CARRIER-PROTEIN (ACP)] SYNTHASE III C TERMINAL	37	0.565418	1.69198	0.0030303	0.107102
PF02518.27:HISTIDINE KINASE-, DNA GYRASE B-, AND HSP90-LIKE ATPASE	84	0.491042	1.6922	0.00138696	0.108551
PF07653.18:VARIANT SH3 DOMAIN	11	0.735574	1.68309	0.015873	0.109949
PF00018.29:SH3 DOMAIN	11	0.735574	1.69248	0.0116861	0.110088
PF05637.13:GALACTOSYL TRANSFERASE GMA12/MNN10 FAMILY	11	0.736785	1.6775	0.0083612	0.115373
PF04398.11:PROTEIN OF UNKNOWN FUNCTION, DUF538	16	0.682572	1.67029	0.00511945	0.124128
PF00166.22:CHAPERONIN 10 KD SUBUNIT	13	0.699938	1.66374	0.0117647	0.124523
PF03732.16:RETROTRANSPOSON GAG PROTEIN	75	0.493888	1.6672	0.00284091	0.124788
PF16499.6:ALPHA GALACTOSIDASE A	20	0.630373	1.66554	0.00515464	0.125298
PF07983.12:X8 DOMAIN	17	0.65677	1.66423	0.0115702	0.125448
PF08387.11:FBD	235	0.424759	1.66081	0	0.125479
PF14604.7:VARIANT SH3 DOMAIN	11	0.735574	1.66138	0.00865052	0.126254
PF00044.25:GLYCERALDEHYDE 3-PHOSPHATE DEHYDROGENASE, NAD BINDING DOMAIN	18	0.646628	1.66728	0.0130506	0.126431
PF01565.22:FAD BINDING DOMAIN	15	0.668232	1.65407	0.00805153	0.131687
PF03822.15:NAF DOMAIN	54	0.51119	1.65512	0.0103093	0.131688
PF00234.21:PROTEASE INHIBITOR/SEED STORAGE/LTP FAMILY	181	0.432763	1.64873	0	0.137751
PF02800.21:GLYCERALDEHYDE 3-PHOSPHATE DEHYDROGENASE, C-TERMINAL DOMAIN	18	0.646628	1.64736	0.01	0.138025
PF13432.5:TETRATRICOPEPTIDE REPEAT	37	0.536601	1.6291	0.00619195	0.160018
PF00407.20:PATHOGENESIS-RELATED PROTEIN BET V 1 FAMILY	27	0.594421	1.6324	0.00488599	0.160452
PF03479.16:PLANTS AND PROKARYOTES CONSERVED (PCC) DOMAIN	34	0.5513	1.62922	0.0144462	0.161787
PF06955.13:XYLOGLUCAN ENDO-TRANSGLYCOSYLASE (XET) C-TERMINUS	40	0.527976	1.62993	0.00598802	0.162565
PF00654.21:VOLTAGE GATED CHLORIDE CHANNEL	18	0.635927	1.61931	0.00810373	0.174295
PF17801.2:ALPHA GALACTOSIDASE C-TERMINAL BETA SANDWICH DOMAIN	19	0.627074	1.61687	0.0208668	0.177272
PF03195.15:LATERAL ORGAN BOUNDARIES (LOB) DOMAIN	19	0.620062	1.61106	0.0128617	0.185822
PF03798.17:TLC DOMAIN	32	0.548415	1.60549	0.0152439	0.193972
PF14223.5:GAG-POLYPEPTIDE OF LTR COPIA-TYPE	49	0.50251	1.60295	0.0157233	0.197093
PF01434.19:PEPTIDASE FAMILY M41	39	0.528942	1.59981	0.0115512	0.198679
PF00258.26:FLAVODOXIN	18	0.61905	1.6005	0.0183639	0.199533
PF08449.12:UAA TRANSPORTER FAMILY	32	0.556359	1.59691	0.00765697	0.202389
PF00080.19:COPPER/ZINC SUPEROXIDE DISMUTASE (SODC)	12	0.691747	1.59305	0.0166667	0.207779
PF09405.11:CASC3/BARENTSZ EIF4AIII BINDING	10	0.718138	1.59057	0.0265018	0.21055
PF01657.18:SALT STRESS RESPONSE/ANTIFUNGAL	54	0.488152	1.5859	0.00435414	0.218172
PF00759.20:GLYCOSYL HYDROLASE FAMILY 9	27	0.56556	1.58092	0.0266041	0.226704
PF01657.16:SALT STRESS RESPONSE/ANTIFUNGAL	11	0.696084	1.57391	0.0385289	0.239726
PF03081.16:EXO70 EXOCYST COMPLEX SUBUNIT	44	0.50393	1.57002	0.02	0.245643
PF00274.20:FRUCTOSE-BISPHOSPHATE ALDOLASE CLASS-I	19	0.61611	1.56876	0.0148515	0.246193
PF00135.29:CARBOXYLESTERASE FAMILY	74	0.462774	1.56723	0.00715308	0.247399
PF00125.25:CORE HISTONE H2A/H2B/H3/H4	344	-0.609344	-2.88208	0	0
PF00280.17:POTATO INHIBITOR I FAMILY	26	-0.78203	-2.42396	0	0
PF15511.7:CENTROMERE KINETOCHORE COMPONENT CENP-T HISTONE FOLD	125	-0.577243	-2.40387	0	0
PF02969.18:TATA BOX BINDING PROTEIN ASSOCIATED FACTOR (TAF)	125	-0.575924	-2.40114	0	0
PF16211.6:C-TERMINUS OF HISTONE H2A	116	-0.575291	-2.36651	0	0
PF00448.21:SRP54-TYPE PROTEIN, GTPASE DOMAIN	22	-0.801824	-2.35308	0	0
PF17855.2:MCM AAA-LID DOMAIN	22	-0.79285	-2.34313	0	0
PF17207.4:MCM OB DOMAIN	22	-0.79285	-2.31048	0	0
PF00493.24:MCM P-LOOP DOMAIN	28	-0.717618	-2.24265	0	0.000130088
PF14551.7:MCM N-TERMINAL DOMAIN	18	-0.810378	-2.24687	0	0.000144542
PF02987.17:LATE EMBRYOGENESIS ABUNDANT PROTEIN	25	-0.728058	-2.18199	0	0.00083563
PF04927.13:SEED MATURATION PROTEIN	15	-0.812639	-2.15715	0	0.00131448
PF00161.20:RIBOSOME INACTIVATING PROTEIN	17	-0.786233	-2.13076	0	0.00192128
PF14510.7:ABC-TRANSPORTER N-TERMINAL	31	-0.645847	-2.08078	0	0.00506404
PF00128.23:ALPHA AMYLASE, CATALYTIC DOMAIN	53	-0.581955	-2.05773	0	0.00745078
PF00182.20:CHITINASE CLASS I	36	-0.598847	-2.03363	0	0.0104066
PF03134.20:TB2/DP1, HVA22 FAMILY	36	-0.613775	-2.00586	0	0.0159473
PF01925.18:SULFITE EXPORTER TAUE/SAFE	15	-0.740513	-1.9988	0	0.0170336
PF02902.18:ULP1 PROTEASE FAMILY, C-TERMINAL CATALYTIC DOMAIN	47	-0.58253	-1.98556	0	0.0193249
PF00150.19:CELLULASE (GLYCOSYL HYDROLASE FAMILY 5)	33	-0.612457	-1.98666	0	0.0197225
PF03760.16:LATE EMBRYOGENESIS ABUNDANT (LEA) GROUP 1	22	-0.662498	-1.97505	0	0.0198725
PF00477.18:SMALL HYDROPHILIC PLANT SEED PROTEIN	11	-0.823855	-1.97752	0	0.0200632
PF02922.17:CARBOHYDRATE-BINDING MODULE 48 (ISOAMYLASE N-TERMINAL DOMAIN)	50	-0.557759	-1.97879	0	0.0203903
PF00280.19:POTATO INHIBITOR I FAMILY	23	-0.670656	-1.96471	0	0.0218378
PF01743.21:POLY A POLYMERASE HEAD DOMAIN	10	-0.807708	-1.96727	0	0.0221498
PF00187.20:CHITIN RECOGNITION PROTEIN	30	-0.60956	-1.95566	0.00282486	0.0226493
PF00190.21:CUPIN	57	-0.549782	-1.9564	0	0.0232701
PF01063.20:AMINO-TRANSFERASE CLASS IV	21	-0.659813	-1.93558	0	0.0282386
PF12609.9:WOUND-INDUCED PROTEIN	46	-0.570173	-1.93715	0	0.0288279
PF00232.17:GLYCOSYL HYDROLASE FAMILY 1	29	-0.60205	-1.9078	0	0.0372155
PF10607.10:CTLH/CRA C-TERMINAL TO LISH MOTIF DOMAIN	24	-0.647984	-1.91056	0	0.0374089
PF00962.21:ADENOSINE/AMP DEAMINASE	13	-0.739581	-1.91266	0.00239808	0.0376166
PF12627.8:PROBABLE RNA AND SRMB- BINDING SITE OF POLYMERASE A	10	-0.807708	-1.90258	0	0.0389709
PF01373.16:GLYCOSYL HYDROLASE FAMILY 14	49	-0.541266	-1.89647	0	0.0411852
PF12481.7:ALUMINIUM INDUCED PROTEIN	20	-0.660379	-1.88835	0.00255754	0.043951
PF13537.5:GLUTAMINE AMIDOTRANSFERASE DOMAIN	18	-0.693564	-1.88354	0	0.0454668
PF00257.20:DEHYDRIN	36	-0.569826	-1.87035	0	0.053034
PF00136.22:DNA POLYMERASE FAMILY B	15	-0.702993	-1.86767	0.004914	0.0532691
PF16189.6:CREATINASE/PROLIDASE N-TERMINAL DOMAIN	14	-0.713208	-1.8639	0.00707547	0.0544647
PF03104.20:DNA POLYMERASE FAMILY B, EXONUCLEASE DOMAIN	14	-0.728444	-1.85555	0.00519481	0.0588302
PF01315.23:ALDEHYDE OXIDASE AND XANTHINE DEHYDROGENASE, A/B HAMMERHEAD DOMAIN	27	-0.596203	-1.85311	0	0.058922
PF01799.21:[2FE-2S] BINDING DOMAIN	27	-0.596203	-1.8494	0	0.0597825
PF00941.22:FAD BINDING DOMAIN IN MOLYBDOPTERIN DEHYDROGENASE	27	-0.596203	-1.84088	0.00530504	0.0647691
PF02738.19:MOLYBDOPTERIN-BINDING DOMAIN OF ALDEHYDE DEHYDROGENASE	27	-0.596203	-1.83884	0	0.0648563
PF00350.24:DYNAMIN FAMILY	51	-0.518126	-1.82449	0	0.070363
PF00161.18:RIBOSOME INACTIVATING PROTEIN	13	-0.721193	-1.82237	0.00260417	0.0704543
PF03450.18:CO DEHYDROGENASE FLAVOPROTEIN C-TERMINAL DOMAIN	27	-0.596203	-1.826	0.00268097	0.070638
PF00733.22:ASPARAGINE SYNTHASE	16	-0.676758	-1.82763	0.00481928	0.0707458
PF00483.22:NUCLEOTIDYL TRANSFERASE	55	-0.504894	-1.81983	0	0.0714688
PF14214.5:HELITRON HELICASE-LIKE DOMAIN AT N-TERMINUS	19	-0.653594	-1.81742	0.0075188	0.071746
PF07883.12:CUPIN DOMAIN	49	-0.512446	-1.81219	0	0.0741783
PF08370.12:PLANT PDR ABC TRANSPORTER ASSOCIATED	38	-0.547273	-1.80726	0	0.0766036
PF13561.5:ENOYL-(ACYL CARRIER PROTEIN) REDUCTASE	58	-0.489725	-1.80119	0	0.0811399
PF02812.19:GLU/LEU/PHE/VAL DEHYDROGENASE, DIMERISATION DOMAIN	10	-0.75523	-1.79287	0.00475059	0.0865398
PF04937.14:PROTEIN OF UNKNOWN FUNCTION (DUF 659)	42	-0.518321	-1.78421	0	0.0931329
PF05512.12:AWPM-19-LIKE FAMILY	14	-0.681017	-1.77524	0.00226757	0.100055
PF00733.20:ASPARAGINE SYNTHASE	10	-0.747041	-1.77006	0.00950119	0.101747
PF01041.18:DEGT/DNRJ/ERYC1/STRS AMINOTRANSFERASE FAMILY	23	-0.595304	-1.76824	0.00815217	0.101984
PF16188.6:C-TERMINAL REGION OF PEPTIDASE_M24	12	-0.709366	-1.77105	0.00729927	0.102545
PF01321.19:CREATINASE/PROLIDASE N-TERMINAL DOMAIN	11	-0.724649	-1.75566	0.0141509	0.11316
PF00106.24:SHORT CHAIN DEHYDROGENASE	62	-0.470453	-1.74328	0	0.119201
PF00125.23:CORE HISTONE H2A/H2B/H3/H4	35	-0.546146	-1.74409	0	0.120247
PF03999.11:MICROTUBULE ASSOCIATED PROTEIN (MAP65/ASE1 FAMILY)	15	-0.661334	-1.74454	0.00763359	0.121574
PF08670.12:MEKHLA DOMAIN	15	-0.669966	-1.7458	0.00542005	0.121953
PF12220.7:U1 SMALL NUCLEAR RIBONUCLEOPROTEIN OF 70KDA MW N TERMINAL	12	-0.692582	-1.73289	0.00702576	0.130234
PF01053.21:CYS/MET METABOLISM PLP-DEPENDENT ENZYME	15	-0.658101	-1.72845	0.0131579	0.133687
PF13899.7:THIOREDOXIN-LIKE	22	-0.589067	-1.72508	0.00515464	0.135967
PF13522.5:GLUTAMINE AMIDOTRANSFERASE DOMAIN	11	-0.706425	-1.72294	0.0120773	0.136743
PF02353.21:MYCOLIC ACID CYCLOPROPANE SYNTHETASE	48	-0.491999	-1.71808	0.00626959	0.140901
PF07722.14:PEPTIDASE C26	40	-0.501836	-1.71485	0.00859599	0.141001
PF12507.7:HUMAN CYTOMEGALOVIRUS UL139 PROTEIN	11	-0.710227	-1.71519	0.0119904	0.142513
PF13537.7:GLUTAMINE AMIDOTRANSFERASE DOMAIN	31	-0.538892	-1.70105	0.0030303	0.147747
PF04819.13:FAMILY OF UNKNOWN FUNCTION (DUF716)	12	-0.688188	-1.70222	0.0151899	0.14831
PF01262.22:ALANINE DEHYDROGENASE/PNT, C-TERMINAL DOMAIN	12	-0.67493	-1.70294	0.0119332	0.149154
PF01373.18:GLYCOSYL HYDROLASE FAMILY 14	21	-0.589627	-1.70351	0.0078534	0.150337
PF16711.6:ACTIN-BINDING DOMAIN OF PLANT-SPECIFIC ACTIN-BINDING PROTEIN	11	-0.698284	-1.70454	0.00980392	0.150965
PF06552.13:PLANT SPECIFIC MITOCHONDRIAL IMPORT RECEPTOR SUBUNIT TOM20	15	-0.634927	-1.70521	0.0176322	0.15199
PF16124.6:RECQ ZINC-BINDING	14	-0.648409	-1.69631	0.0168269	0.152094
PF00704.29:GLYCOSYL HYDROLASES FAMILY 18	19	-0.603024	-1.69017	0.0124069	0.158534
PF12481.9:ALUMINIUM INDUCED PROTEIN	20	-0.593377	-1.67373	0.0181818	0.175634
PF00208.22:GLUTAMATE/LEUCINE/PHENYLALANINE/VALINE DEHYDROGENASE	14	-0.644515	-1.67037	0.0248139	0.176376
PF10607.8:CTLH/CRA C-TERMINAL TO LISH MOTIF DOMAIN	12	-0.669818	-1.67379	0.00465116	0.177721
PF08123.14:HISTONE METHYLATION PROTEIN DOT1	14	-0.636703	-1.67066	0.0335917	0.178154
PF05542.10:PROTEIN OF UNKNOWN FUNCTION (DUF760)	15	-0.628925	-1.67433	0.0124069	0.179074
PF14547.7:HYDROPHOBIC SEED PROTEIN	23	-0.561644	-1.66597	0.00819672	0.180797
PF00614.23:PHOSPHOLIPASE D ACTIVE SITE MOTIF	20	-0.570884	-1.65608	0.0257069	0.184857
PF13975.5:GAG-POLYPROTEIN PUTATIVE ASPARTYL PROTEASE	13	-0.643307	-1.65974	0.0227273	0.185699
PF00982.20:GLYCOSYLTRANSFERASE FAMILY 20	20	-0.585325	-1.65662	0.0153061	0.186065
PF00228.21:BOWMAN-BIRK SERINE PROTEASE INHIBITOR FAMILY	21	-0.581325	-1.6608	0.012987	0.186157
PF00314.18:THAUMATIN FAMILY	53	-0.467362	-1.65365	0.00884956	0.186873
PF01217.21:CLATHRIN ADAPTOR COMPLEX SMALL CHAIN	29	-0.523816	-1.65725	0.0105263	0.18727
PF02319.21:E2F/DP FAMILY WINGED-HELIX DNA-BINDING DOMAIN	25	-0.53194	-1.64501	0.0184211	0.198706
PF16450.6:PROTEASOMAL ATPASE OB C-TERMINAL DOMAIN	27	-0.538013	-1.64141	0.00765306	0.202759
PF08880.12:QLQ	25	-0.533883	-1.63157	0.0220386	0.217047
PF00083.25:SUGAR (AND OTHER) TRANSPORTER	147	-0.384923	-1.62302	0	0.229607
PF01135.20:PROTEIN-L-ISOASPARTATE(D-ASPARTATE) O-METHYLTRANSFERASE (PCMT)	24	-0.549772	-1.62172	0.0131579	0.230068
PF00752.18:XPG N-TERMINAL DOMAIN	20	-0.566132	-1.6205	0.0215054	0.230307
PF01397.22:TERPENE SYNTHASE, N-TERMINAL DOMAIN	10	-0.675857	-1.6165	0.0322581	0.23492
PF03193.17:RSGA GTPASE	35	-0.485732	-1.60776	0.0189702	0.245788
PF01566.19:NATURAL RESISTANCE-ASSOCIATED MACROPHAGE PROTEIN	18	-0.587979	-1.6058	0.0335731	0.247118
PF03947.19:RIBOSOMAL PROTEINS L2, C-TERMINAL DOMAIN	10	-0.68289	-1.60789	0.0294118	0.248123

## Sheet: Table S6
Supplementary Table S6: Differentially enriched Pfam in Z168N vs. Z168
NAME	SIZE	ES	NES	NOM p-val	FDR q-val
PF17886.2:HSP20-LIKE DOMAIN FOUND IN ARSA	82	0.809033	4.01303	0	0
PF00011.22:HSP20/ALPHA CRYSTALLIN FAMILY	107	0.766983	3.95408	0	0
PF00012.21:HSP70 PROTEIN	61	0.652024	3.22177	0	0
PF02987.17:LATE EMBRYOGENESIS ABUNDANT PROTEIN	25	0.766765	3.11153	0	0
PF00447.16:HSF-TYPE DNA-BINDING	41	0.682195	3.01217	0	0
PF03386.15:EARLY NODULIN 93 ENOD93 PROTEIN	36	0.689916	2.95188	0	0
PF13016.7:CYS-RICH GLIADIN N-TERMINAL	99	0.561398	2.93189	0	0
PF02179.17:BAG DOMAIN	35	0.645319	2.80265	0	0
PF04927.11:SEED MATURATION PROTEIN	14	0.847984	2.79074	0	0
PF06723.12:MREB/MBL PROTEIN	48	0.612218	2.77811	0	0
PF00012.19:HSP70 PROTEIN	66	0.569466	2.63488	0	7.64e-05
PF02536.13:MTERF	44	0.565137	2.65913	0	8.28e-05
PF00447.18:HSF-TYPE DNA-BINDING	57	0.551114	2.67034	0	9.03e-05
PF00101.21:RIBULOSE BISPHOSPHATE CARBOXYLASE, SMALL CHAIN	16	0.747578	2.57141	0	0.000103
PF12338.9:RIBULOSE-1,5-BISPHOSPHATE CARBOXYLASE SMALL SUBUNIT	16	0.747578	2.57437	0	0.000109
PF00257.18:DEHYDRIN	13	0.80903	2.57657	0	0.000115
PF00504.22:CHLOROPHYLL A-B BINDING PROTEIN	59	0.541669	2.58068	0	0.000121
PF06723.14:MREB/MBL PROTEIN	61	0.544404	2.59233	0	0.000129
PF00183.19:HSP90 PROTEIN	20	0.70028	2.59519	0	0.000138
PF00011.20:HSP20/ALPHA CRYSTALLIN FAMILY	40	0.617279	2.60318	0	0.000147
PF00254.27:FKBP-TYPE PEPTIDYL-PROLYL CIS-TRANS ISOMERASE	26	0.607096	2.46208	0	0.000464
PF09405.11:CASC3/BARENTSZ EIF4AIII BINDING	10	0.820347	2.42856	0	0.000642
PF00188.27:CYSTEINE-RICH SECRETORY PROTEIN FAMILY	12	0.754267	2.34494	0	0.00180015
PF13016.5:CYS-RICH GLIADIN N-TERMINAL	120	0.41068	2.23992	0	0.00437894
PF01754.17:A20-LIKE ZINC FINGER	18	0.61947	2.24623	0	0.00442371
PF02987.15:LATE EMBRYOGENESIS ABUNDANT PROTEIN	11	0.733805	2.19019	0.00606061	0.0065458
PF00320.26:GATA ZINC FINGER	27	0.559207	2.15027	0	0.0094186
PF05512.12:AWPM-19-LIKE FAMILY	14	0.649043	2.14118	0	0.00991909
PF13589.5:HISTIDINE KINASE-, DNA GYRASE B-, AND HSP90-LIKE ATPASE	27	0.522777	2.12962	0	0.0106912
PF00234.21:PROTEASE INHIBITOR/SEED STORAGE/LTP FAMILY	181	0.364388	2.07895	0	0.0150812
PF01428.17:AN1-LIKE ZINC FINGER	26	0.489951	2.05049	0	0.0179124
PF16900.4:REPLICATION PROTEIN A OB DOMAIN	10	0.672922	2.02707	0.00588235	0.0196814
PF00166.22:CHAPERONIN 10 KD SUBUNIT	13	0.598355	1.99466	0.0060241	0.0240029
PF01965.23:DJ-1/PFPI FAMILY	17	0.552832	1.98866	0	0.0242165
PF13173.5:AAA DOMAIN	12	0.605714	1.9633	0.00552486	0.0287738
PF12775.8:P-LOOP CONTAINING DYNEIN MOTOR REGION	21	0.485625	1.91425	0	0.0383854
PF02806.19:ALPHA AMYLASE, C-TERMINAL ALL-BETA DOMAIN	14	0.539997	1.84365	0.00621118	0.0605904
PF13173.7:AAA DOMAIN	39	0.425825	1.8369	0	0.0618798
PF12609.9:WOUND-INDUCED PROTEIN	46	0.399033	1.78915	0.0425532	0.0822233
PF02861.21:CLP AMINO TERMINAL DOMAIN, PATHOGENICITY ISLAND COMPONENT	30	0.443514	1.7658	0.0120482	0.0913604
PF03208.18:PRA1 FAMILY PROTEIN	13	0.525909	1.73655	0.0179641	0.0935711
PF00228.21:BOWMAN-BIRK SERINE PROTEASE INHIBITOR FAMILY	21	0.450572	1.74725	0	0.0941374
PF01661.20:MACRO DOMAIN	14	0.512133	1.75392	0	0.094778
PF01704.17:UTP--GLUCOSE-1-PHOSPHATE URIDYLYLTRANSFERASE	17	0.480213	1.73848	0	0.0948059
PF00080.19:COPPER/ZINC SUPEROXIDE DISMUTASE (SODC)	12	0.565358	1.74138	0.00632911	0.0955051
PF00234.23:PROTEASE INHIBITOR/SEED STORAGE/LTP FAMILY	213	0.291774	1.74844	0	0.0955728
PF04678.14:MITOCHONDRIAL CALCIUM UNIPORTER	10	0.5748	1.70609	0.0052356	0.10653
PF02466.18:TIM17/TIM22/TIM23/PMP24 FAMILY	23	0.444882	1.70161	0.025	0.106805
PF00079.21:SERPIN (SERINE PROTEASE INHIBITOR)	26	0.429289	1.70922	0.0204082	0.106816
PF17871.2:AAA LID DOMAIN	36	0.382506	1.67078	0	0.118551
PF01202.23:SHIKIMATE KINASE	17	0.483873	1.67652	0.034188	0.119319
PF00190.21:CUPIN	57	0.343405	1.66496	0	0.119779
PF13740.5:ACT DOMAIN	13	0.524991	1.67127	0.0268456	0.120518
PF04969.17:CS DOMAIN	21	0.417976	1.64631	0.017094	0.129928
PF01556.17:DNAJ C TERMINAL DOMAIN	19	0.443718	1.62974	0.0208333	0.139781
PF03595.18:VOLTAGE-DEPENDENT ANION CHANNEL	13	0.502934	1.62409	0.0266667	0.141668
PF10431.10:C-TERMINAL, D2-SMALL DOMAIN, OF CLPB PROTEIN	45	0.364218	1.6054	0.0169492	0.154069
PF13401.5:AAA DOMAIN	41	0.36124	1.599	0	0.156231
PF04969.15:CS DOMAIN	14	0.475818	1.58958	0.0316456	0.160869
PF01695.18:ISTB-LIKE ATP BINDING PROTEIN	37	0.345758	1.56779	0.0138889	0.173097
PF02922.19:CARBOHYDRATE-BINDING MODULE 48 (ISOAMYLASE N-TERMINAL DOMAIN)	34	0.354648	1.56878	0.0224719	0.175299
PF01556.19:DNAJ C TERMINAL DOMAIN	45	0.357688	1.55419	0.0425532	0.182526
PF00696.27:AMINO ACID KINASE FAMILY	21	0.394707	1.51335	0.0472441	0.214114
PF03931.16:SKP1 FAMILY, TETRAMERISATION DOMAIN	34	0.353785	1.49575	0	0.226234
PF02518.25:HISTIDINE KINASE-, DNA GYRASE B-, AND HSP90-LIKE ATPASE	37	0.335122	1.48358	0.0294118	0.229408
PF12609.7:WOUND-INDUCED PROTEIN	10	0.493973	1.48434	0.0462428	0.231983
PF00128.25:ALPHA AMYLASE, CATALYTIC DOMAIN	46	0.304927	1.4731	0.0444444	0.234214
PF05621.12:BACTERIAL TNIB PROTEIN	29	0.366344	1.46157	0.0422535	0.244489
PF00929.23:EXONUCLEASE	25	-0.647222	-1.84194	0	0.0600495
PF09818.10:PREDICTED ATPASE OF THE ABC CLASS	27	-0.647715	-1.84665	0.00110497	0.0622359
PF17855.2:MCM AAA-LID DOMAIN	22	-0.671294	-1.84968	0.00114025	0.0661847
PF02265.17:S1/P1 NUCLEASE	17	-0.706955	-1.85309	0	0.0717722
PF00202.22:AMINOTRANSFERASE CLASS-III	24	-0.652947	-1.8224	0	0.0752174
PF14551.7:MCM N-TERMINAL DOMAIN	18	-0.703704	-1.85803	0	0.0798006
PF10358.10:N-TERMINAL C2 IN EEIG1 AND EHBP1 PROTEINS	16	-0.693129	-1.81224	0	0.0802576
PF07766.14:LETM1-LIKE PROTEIN	13	-0.713996	-1.78845	0.00118624	0.0908463
PF17207.4:MCM OB DOMAIN	22	-0.671294	-1.8814	0	0.0924314
PF01532.21:GLYCOSYL HYDROLASE FAMILY 47	13	-0.736366	-1.8617	0.00119904	0.0928271
PF01031.21:DYNAMIN CENTRAL REGION	23	-0.634702	-1.79405	0.00112233	0.0961794
PF07526.12:ASSOCIATED WITH HOX	18	-0.663635	-1.77954	0	0.0963388
PF02212.19:DYNAMIN GTPASE EFFECTOR DOMAIN	22	-0.648076	-1.78848	0	0.0978345
PF05653.15:MAGNESIUM TRANSPORTER NIPA	32	-0.586939	-1.76287	0.00108932	0.115737
PF01112.17:ASPARAGINASE	10	-0.765077	-1.75517	0.002442	0.123949
PF13458.7:PERIPLASMIC BINDING PROTEIN	20	-0.639921	-1.74933	0.00226501	0.128169
PF01094.29:RECEPTOR FAMILY LIGAND BINDING REGION	20	-0.639921	-1.73835	0.00221976	0.143244
PF02291.16:TRANSCRIPTION INITIATION FACTOR IID, 31KD SUBUNIT	11	-0.732684	-1.73345	0.00241546	0.144593
PF11443.9:DOMAIN OF UNKNOWN FUNCTION (DUF2828)	10	-0.741272	-1.72841	0.00122549	0.147089
PF00388.20:PHOSPHATIDYLINOSITOL-SPECIFIC PHOSPHOLIPASE C, X DOMAIN	10	-0.733234	-1.72217	0.00737101	0.154119
PF04142.16:NUCLEOTIDE-SUGAR TRANSPORTER	17	-0.642758	-1.71318	0.00233645	0.160657
PF00854.22:POT FAMILY	118	-0.49751	-1.71631	0	0.161268
PF03552.13:CELLULOSE SYNTHASE	23	-0.608445	-1.68682	0.00225225	0.20378
PF06552.13:PLANT SPECIFIC MITOCHONDRIAL IMPORT RECEPTOR SUBUNIT TOM20	15	-0.657543	-1.69247	0.00580046	0.205114
PF00497.21:BACTERIAL EXTRACELLULAR SOLUTE-BINDING PROTEINS, FAMILY 3	21	-0.615038	-1.6882	0.0055991	0.20766
PF04427.19:BRIX DOMAIN	19	-0.619748	-1.67543	0.00340136	0.227157
PF00536.31:SAM DOMAIN (STERILE ALPHA MOTIF)	22	-0.605162	-1.66976	0.00225989	0.236178
PF04193.15:PQ LOOP REPEAT	24	-0.578414	-1.66399	0.0110619	0.24714

## Sheet: Table S7
Supplementary Table S7: Differentially enriched Pfam in Y13N vs. Y13
NAME	SIZE	ES	NES	NOM p-val	FDR q-val
PF13016.7:CYS-RICH GLIADIN N-TERMINAL	99	0.582203	2.61943	0	0
PF01764.24:LIPASE (CLASS 3)	19	0.629187	2.03426	0.00423729	0.0954032
PF02138.19:BEIGE/BEACH DOMAIN	17	0.66827	2.02053	0.00367647	0.0983794
PF02922.19:CARBOHYDRATE-BINDING MODULE 48 (ISOAMYLASE N-TERMINAL DOMAIN)	34	0.591321	2.11827	0	0.100275
PF02806.19:ALPHA AMYLASE, C-TERMINAL ALL-BETA DOMAIN	14	0.706079	2.04041	0	0.102014
PF01504.19:PHOSPHATIDYLINOSITOL-4-PHOSPHATE 5-KINASE	54	0.49307	1.9722	0	0.106436
PF12624.8:N-TERMINAL REGION OF CHOREIN OR VPS13	16	0.689835	2.09285	0	0.106931
PF07529.14:HSA	11	0.716295	1.95411	0.00346021	0.109934
PF08766.12:DEK C TERMINAL DOMAIN	18	0.634407	1.92573	0.00371747	0.112128
PF06650.13:SHR-BINDING DOMAIN OF VACUOLAR-SORTING ASSOCIATED PROTEIN 13	13	0.678961	1.92011	0.0108696	0.112697
PF00128.25:ALPHA AMYLASE, CATALYTIC DOMAIN	46	0.50674	1.97232	0	0.115306
PF14288.7:1,3-BETA-GLUCAN SYNTHASE SUBUNIT FKS1, DOMAIN-1	29	0.555402	1.93905	0.00469484	0.116805
PF15787.6:DOMAIN OF UNKNOWN FUNCTION (DUF4704)	10	0.775968	1.9544	0	0.117587
PF00330.21:ACONITASE FAMILY (ACONITATE HYDRATASE)	12	0.706675	1.92588	0.0034965	0.118202
PF14844.7:PH DOMAIN ASSOCIATED WITH BEIGE/BEACH	14	0.709679	2.04139	0	0.11831
PF00454.26:PHOSPHATIDYLINOSITOL -3 AND 4-KINASE	30	0.559307	1.93074	0	0.118463
PF04884.13:VITAMIN B6 PHOTO-PROTECTION AND HOMOEOSTASIS	11	0.731085	1.97701	0.00357143	0.120519
PF00862.18:SUCROSE SYNTHASE	29	0.608212	2.1353	0	0.120568
PF01373.16:GLYCOSYL HYDROLASE FAMILY 14	49	0.503466	1.98476	0	0.122579
PF08214.12:HISTONE ACETYLATION PROTEIN	11	0.771408	2.04356	0.00326797	0.138922
PF07973.15:THREONYL AND ALANYL TRNA SYNTHETASE SECOND ADDITIONAL DOMAIN	16	0.631749	1.84313	0.00806452	0.203289
PF04652.17:VTA1 LIKE	17	0.618273	1.83144	0.00833333	0.215354
PF00626.21:GELSOLIN REPEAT	15	0.601012	1.76034	0.0183824	0.245649
PF08123.14:HISTONE METHYLATION PROTEIN DOT1	14	0.607071	1.75463	0.0222222	0.24724
PF17886.2:HSP20-LIKE DOMAIN FOUND IN ARSA	82	-0.683138	-2.32098	0	0
PF00011.22:HSP20/ALPHA CRYSTALLIN FAMILY	107	-0.6337	-2.21411	0	0
PF02458.16:TRANSFERASE FAMILY	98	-0.61855	-2.15557	0	0
PF14368.7:PROBABLE LIPID TRANSFER	119	-0.584234	-2.07483	0	0.000444476
PF00011.20:HSP20/ALPHA CRYSTALLIN FAMILY	40	-0.665022	-2.02259	0	0.00303195
PF00201.19:UDP-GLUCORONOSYL AND UDP-GLUCOSYL TRANSFERASE	174	-0.547407	-2.00954	0	0.00386465
PF17766.2:FIBRONECTIN TYPE-III DOMAIN	44	-0.650823	-1.99248	0	0.00534562
PF05922.17:PEPTIDASE INHIBITOR I9	46	-0.645372	-1.9786	0	0.00612587
PF00657.23:GDSL-LIKE LIPASE/ACYLHYDROLASE	149	-0.543516	-1.96731	0	0.00642523
PF03321.14:GH3 AUXIN-RESPONSIVE PROMOTER	12	-0.821601	-1.95672	0	0.0078201
PF00403.27:HEAVY-METAL-ASSOCIATED DOMAIN	107	-0.543611	-1.89919	0	0.0162153
PF18036.2:UBIQUITIN-LIKE DOMAIN	33	-0.651849	-1.89922	0	0.0175666
PF16913.6:PURINE NUCLEOBASE TRANSMEMBRANE TRANSPORT	26	-0.678958	-1.90303	0	0.0177022
PF01490.19:TRANSMEMBRANE AMINO ACID TRANSPORTER PROTEIN	117	-0.527173	-1.87335	0	0.0258566
PF03171.21:2OG-FE(II) OXYGENASE SUPERFAMILY	182	-0.504822	-1.84482	0	0.0386835
PF00191.21:ANNEXIN	18	-0.706965	-1.83761	0.00134589	0.038986
PF02469.23:FASCICLIN DOMAIN	43	-0.589317	-1.84085	0	0.0393387
PF00724.21:NADH:FLAVIN OXIDOREDUCTASE / NADH OXIDASE FAMILY	21	-0.708028	-1.84671	0	0.0395994
PF00067.23:CYTOCHROME P450	350	-0.479432	-1.82263	0	0.0413241
PF00082.23:SUBTILASE FAMILY	53	-0.56943	-1.82389	0	0.0423175
PF14226.7:NON-HAEM DIOXYGENASE IN MORPHINE SYNTHESIS N-TERMINAL	155	-0.507446	-1.82854	0	0.0435453
PF14363.7:DOMAIN ASSOCIATED AT C-TERMINAL WITH AAA	32	-0.62125	-1.82434	0	0.044122
PF11443.9:DOMAIN OF UNKNOWN FUNCTION (DUF2828)	10	-0.804839	-1.79884	0	0.0584757
PF03168.14:LATE EMBRYOGENESIS ABUNDANT PROTEIN	74	-0.531926	-1.78924	0.00113122	0.0591565
PF02298.18:PLASTOCYANIN-LIKE DOMAIN	75	-0.540514	-1.79148	0	0.0598827
PF03208.20:PRA1 FAMILY PROTEIN	13	-0.747605	-1.78323	0	0.0602394
PF02365.16:NO APICAL MERISTEM (NAM) PROTEIN	168	-0.491365	-1.79367	0	0.0603018
PF10302.10:DUF2407 UBIQUITIN-LIKE DOMAIN	39	-0.590552	-1.78489	0.00119048	0.0609216
PF13520.7:AMINO ACID PERMEASE	46	-0.57291	-1.77733	0	0.0611437
PF02458.14:TRANSFERASE FAMILY	19	-0.683407	-1.7716	0.0012837	0.0611859
PF00221.20:AROMATIC AMINO ACID LYASE	26	-0.631924	-1.7726	0.00378788	0.0622913
PF00847.21:AP2 DOMAIN	154	-0.493553	-1.778	0	0.0625483
PF00324.22:AMINO ACID PERMEASE	46	-0.57291	-1.76776	0	0.0626287
PF00079.21:SERPIN (SERINE PROTEASE INHIBITOR)	26	-0.638371	-1.77401	0.00251889	0.0628966
PF14368.5:PROBABLE LIPID TRANSFER	46	-0.569908	-1.74458	0.00119904	0.0795263
PF08545.11:3-OXOACYL-[ACYL-CARRIER-PROTEIN (ACP)] SYNTHASE III	17	-0.668683	-1.74532	0.00665779	0.080947
PF00854.22:POT FAMILY	118	-0.498489	-1.74641	0	0.0819138
PF01476.21:LYSM DOMAIN	22	-0.637447	-1.73507	0.00514139	0.0862452
PF04674.13:PHOSPHATE-INDUCED PROTEIN 1 CONSERVED REGION	18	-0.672302	-1.72949	0.00135501	0.0866502
PF01145.26:SPFH DOMAIN / BAND 7 FAMILY	35	-0.581403	-1.73658	0.00124688	0.0868519
PF08246.13:CATHEPSIN PROPEPTIDE INHIBITOR DOMAIN (I29)	59	-0.535492	-1.7307	0	0.0874181
PF00394.23:MULTICOPPER OXIDASE	31	-0.587268	-1.73212	0	0.0877137
PF08541.11:3-OXOACYL-[ACYL-CARRIER-PROTEIN (ACP)] SYNTHASE III C TERMINAL	37	-0.575592	-1.72039	0.00246914	0.0951579
PF14200.7:RICIN-TYPE BETA-TREFOIL LECTIN DOMAIN-LIKE	15	-0.692017	-1.7168	0.00402685	0.0976037
PF12861.8:ANAPHASE-PROMOTING COMPLEX SUBUNIT 11 RING-H2 FINGER	125	-0.47805	-1.71358	0.00106496	0.097669
PF01190.18:POLLEN PROTEIN OLE E 1 LIKE	33	-0.587068	-1.71399	0.00125	0.0994249
PF00230.21:MAJOR INTRINSIC PROTEIN	60	-0.527197	-1.71071	0.00234742	0.0995815
PF08392.13:FAE1/TYPE III POLYKETIDE SYNTHASE-LIKE PROTEIN	34	-0.581262	-1.69952	0	0.104299
PF03195.15:LATERAL ORGAN BOUNDARIES (LOB) DOMAIN	19	-0.636052	-1.6975	0.00536193	0.105084
PF14437.7:MAFB19-LIKE DEAMINASE	20	-0.640659	-1.69968	0.00514139	0.10617
PF04398.13:PROTEIN OF UNKNOWN FUNCTION, DUF538	61	-0.523869	-1.70083	0.00234192	0.106643
PF06522.12:NADH-UBIQUINONE REDUCTASE COMPLEX 1 MLRQ SUBUNIT	12	-0.713692	-1.69511	0.00853485	0.106679
PF02797.16:CHALCONE AND STILBENE SYNTHASES, C-TERMINAL DOMAIN	34	-0.581262	-1.70349	0	0.106977
PF00704.29:GLYCOSYL HYDROLASES FAMILY 18	19	-0.658659	-1.70144	0.00260078	0.107931
PF00182.20:CHITINASE CLASS I	36	-0.569064	-1.69126	0.00123916	0.110395
PF14299.7:PHLOEM PROTEIN 2	28	-0.599161	-1.68824	0.001287	0.111155
PF18037.2:UBIQUITIN-LIKE DOMAIN	44	-0.550867	-1.68911	0	0.111821
PF04577.13:PROTEIN OF UNKNOWN FUNCTION (DUF563)	29	-0.588742	-1.6782	0.00505689	0.124223
PF15365.7:PROLINE-RICH NUCLEAR RECEPTOR COACTIVATOR MOTIF	16	-0.666882	-1.6752	0.00537634	0.127092
PF11960.9:DOMAIN OF UNKNOWN FUNCTION (DUF3474)	19	-0.642531	-1.67043	0.00641848	0.127959
PF12861.6:ANAPHASE-PROMOTING COMPLEX SUBUNIT 11 RING-H2 FINGER	48	-0.540991	-1.67144	0.003663	0.128423
PF01453.25:D-MANNOSE BINDING LECTIN	61	-0.516109	-1.67193	0	0.129868
PF14226.5:NON-HAEM DIOXYGENASE IN MORPHINE SYNTHESIS N-TERMINAL	45	-0.536633	-1.66252	0.00232829	0.13705
PF00487.25:FATTY ACID DESATURASE	22	-0.615193	-1.65888	0.00764331	0.140624
PF07983.14:X8 DOMAIN	67	-0.498741	-1.65216	0.00115207	0.148107
PF14560.7:UBIQUITIN-LIKE DOMAIN	85	-0.48673	-1.65226	0.00110742	0.150168
PF00332.19:GLYCOSYL HYDROLASES FAMILY 17	77	-0.492439	-1.64596	0.00224719	0.156753
PF00112.24:PAPAIN FAMILY CYSTEINE PROTEASE	49	-0.522951	-1.64449	0.00595948	0.157536
PF00135.29:CARBOXYLESTERASE FAMILY	74	-0.490993	-1.64203	0	0.159381
PF11976.9:UBIQUITIN-2 LIKE RAD60 SUMO-LIKE	115	-0.463184	-1.63144	0.00106838	0.162415
PF13410.7:GLUTATHIONE S-TRANSFERASE, C-TERMINAL DOMAIN	125	-0.461509	-1.63912	0	0.162606
PF01202.23:SHIKIMATE KINASE	17	-0.641243	-1.63754	0.0105541	0.163211
PF00298.20:RIBOSOMAL PROTEIN L11, RNA BINDING DOMAIN	12	-0.697333	-1.63181	0.0136986	0.163697
PF00355.27:RIESKE [2FE-2S] DOMAIN	25	-0.58779	-1.636	0.0127714	0.163945
PF01754.17:A20-LIKE ZINC FINGER	18	-0.636339	-1.63275	0.0165517	0.164063
PF00332.17:GLYCOSYL HYDROLASES FAMILY 17	20	-0.614435	-1.62922	0.0149864	0.164544
PF08372.11:PLANT PHOSPHORIBOSYLTRANSFERASE C-TERMINAL	22	-0.592456	-1.62623	0.0117955	0.165672
PF12023.9:DOMAIN OF UNKNOWN FUNCTION (DUF3511)	15	-0.656633	-1.63409	0.00403769	0.165719
PF03478.19:PROTEIN OF UNKNOWN FUNCTION (DUF295)	151	-0.453388	-1.63288	0	0.166076
PF00582.25:UNIVERSAL STRESS PROTEIN FAMILY	41	-0.538228	-1.62653	0.00608273	0.167264
PF03168.12:LATE EMBRYOGENESIS ABUNDANT PROTEIN	17	-0.633954	-1.62095	0.00406504	0.170871
PF00954.21:S-LOCUS GLYCOPROTEIN DOMAIN	51	-0.515227	-1.62099	0.00579374	0.172915
PF07731.15:MULTICOPPER OXIDASE	34	-0.547514	-1.61806	0.00506329	0.174255
PF00248.22:ALDO/KETO REDUCTASE FAMILY	67	-0.489717	-1.61636	0.0034642	0.175465
PF05690.15:THIAZOLE BIOSYNTHESIS PROTEIN THIG	10	-0.717679	-1.61416	0.0154062	0.177682
PF08387.11:FBD	235	-0.430367	-1.60878	0	0.181556
PF05678.15:VQ MOTIF	17	-0.619115	-1.60704	0.00949797	0.182653
PF13522.7:GLUTAMINE AMIDOTRANSFERASE DOMAIN	24	-0.588029	-1.60889	0.00534045	0.183408
PF07732.16:MULTICOPPER OXIDASE	34	-0.547514	-1.60996	0.00512164	0.183423
PF00930.22:DIPEPTIDYL PEPTIDASE IV (DPP IV) N-TERMINAL REGION	11	-0.68967	-1.60264	0.0271041	0.183491
PF04185.15:PHOSPHOESTERASE FAMILY	11	-0.693038	-1.60307	0.0182073	0.184645
PF03946.15:RIBOSOMAL PROTEIN L11, N-TERMINAL DOMAIN	12	-0.697333	-1.59979	0.0109439	0.185125
PF02544.17:3-OXO-5-ALPHA-STEROID 4-DEHYDROGENASE	13	-0.661914	-1.60029	0.0140449	0.186147
PF13578.7:METHYLTRANSFERASE DOMAIN	15	-0.651447	-1.60313	0.00951087	0.186556
PF01596.18:O-METHYLTRANSFERASE	14	-0.660111	-1.59728	0.0111266	0.18779
PF04043.16:PLANT INVERTASE/PECTIN METHYLESTERASE INHIBITOR	61	-0.489887	-1.60315	0.00228571	0.18858
PF00305.20:LIPOXYGENASE	26	-0.575125	-1.59299	0.00636943	0.194631
PF02225.21:PA DOMAIN	25	-0.57678	-1.58998	0.0123762	0.19868
PF01357.20:POLLEN ALLERGEN	13	-0.663401	-1.58744	0.0217687	0.202063
PF18396.2:TANK BINDING KINASE 1 UBIQUITIN-LIKE DOMAIN	44	-0.512046	-1.58519	0.00480192	0.204679
PF03081.14:EXO70 EXOCYST COMPLEX SUBUNIT	14	-0.648192	-1.57704	0.0203252	0.218133
PF17830.2:STI1 DOMAIN	18	-0.615306	-1.57784	0.0216802	0.218354
PF17123.6:RING-LIKE ZINC FINGER	235	-0.422512	-1.57549	0	0.219365
PF00141.24:PEROXIDASE	163	-0.430871	-1.57309	0	0.222702
PF13912.7:C2H2-TYPE ZINC FINGER	28	-0.547549	-1.56907	0.0101138	0.228115
PF01694.23:RHOMBOID FAMILY	50	-0.497174	-1.56395	0.0119617	0.229496
PF04607.18:REGION FOUND IN RELA / SPOT PROTEINS	14	-0.646347	-1.56942	0.0138696	0.229611
PF06814.14:LUNG SEVEN TRANSMEMBRANE RECEPTOR	12	-0.665078	-1.56726	0.0144509	0.23012
PF00240.24:UBIQUITIN FAMILY	171	-0.433361	-1.56408	0.00103627	0.231235
PF00320.28:GATA ZINC FINGER	55	-0.489603	-1.56489	0.00697674	0.231528
PF03479.16:PLANTS AND PROKARYOTES CONSERVED (PCC) DOMAIN	34	-0.529415	-1.56542	0.0112923	0.232411
PF13328.7:HD DOMAIN	14	-0.646347	-1.56174	0.0153203	0.232879
PF12678.8:RING-H2 ZINC FINGER DOMAIN	176	-0.425971	-1.55795	0	0.23995
PF04749.18:PLAC8 FAMILY	36	-0.522093	-1.55508	0.0149626	0.244773
PF05553.12:COTTON FIBRE EXPRESSED PROTEIN	47	-0.497886	-1.54904	0.0118064	0.246447
PF05042.12:CALEOSIN RELATED PROTEIN	44	-0.501534	-1.55222	0.0110024	0.247162
PF01679.18:PROTEOLIPID MEMBRANE POTENTIAL MODULATOR	23	-0.56936	-1.54926	0.015444	0.247853
PF00195.20:CHALCONE AND STILBENE SYNTHASES, N-TERMINAL DOMAIN	15	-0.625578	-1.55089	0.0206044	0.24828
PF00098.24:ZINC KNUCKLE	62	-0.483847	-1.54969	0.0058548	0.24889
PF05042.14:CALEOSIN RELATED PROTEIN	34	-0.531752	-1.55236	0.0181818	0.248916
