# Supplementary material for: The Landscapes of Gluten Regulatory Network in Elite Wheat Cultivars Contrasting in Gluten Strength
Source: Int J Mol Sci. 2023 May 29;24(11):9447. doi: 10.3390/ijms24119447 (PMC10253585; doi:10.3390/ijms24119447)
Supplement: Supplementary file 1 [file ijms-24-09447-s001.zip › Table S8-S10.xlsx]

## Sheet: Table S8
Supplementary Table S8: Significantly enriched Pfam for DETs in Z168N vs. Y13N
ID	setSize	enrichmentScore	NES	pvalue	p.adjust	qvalues	rank	core_enrichment
PF00011: Hsp20/alpha crystallin family	112	0.670795	3.73768	1e-10	9.625e-09	7.65789e-09	2385	PB.22700.2/TraesCS7D02G179000.1/TraesCS7D02G179600.1/PB.23795.2/TraesCS4A02G092800.1/TraesCS3A02G112900.1/TraesCS7B02G083100.1/TraesCS7B02G083500.1/TraesCS5A02G257700.1/TraesCS7D02G179100.1/TraesCS4D02G086200.1/TraesCS3D02G114800.1/TraesCS3A02G113000.1/TraesCS3D02G115000.1/TraesCS5D02G266000.1/PB.26131.1/TraesCS7A02G177700.1/TraesCS4D02G212300.1/TraesCS4D02G213300.1/TraesCS5B02G257000.1/TraesCS4A…
PF00125: Core histone H2A/H2B/H3/H4	123	-0.429046	-2.82848	1e-10	9.625e-09	7.65789e-09	5193	TraesCS1B02G378700.1/TraesCS6A02G042700.1/TraesCS6D02G040200.1/TraesCS4A02G311600.1/TraesCS6D02G040700.1/TraesCS2D02G297000.1/TraesCS7A02G102900.1/TraesCS6A02G155800.1/TraesCS7A02G119900.1/TraesCS6B02G082400.1/TraesCSU02G182300.1/TraesCS7B02G019000.1/TraesCS1A02G306400.1/TraesCSU02G081100.1/TraesCS4B02G275500.1/TraesCS5A02G455900.1/TraesCS1B02G416600.1/TraesCS2A02G312400.1/PB.46422.1/TraesCS4B02G…
PF00183: Hsp90 protein	17	0.825572	2.85554	1e-10	9.625e-09	7.65789e-09	2007	PB.30583.2/TraesCS2A02G033700.1/TraesCS2B02G047400.1/TraesCS7A02G242200.1/TraesCS7B02G149200.1/PB.13441.4/PB.13441.1/TraesCS5D02G258900.2/PB.13441.3/PB.13441.2/PB.33642.2/TraesCS7A02G529900.1/TraesCS5B02G249000.2/TraesCS7D02G241100.1/PB.45695.3/TraesCS5A02G251000.1
PF17886: HSP20-like domain found in ArsA	70	0.695318	3.49974	1e-10	9.625e-09	7.65789e-09	2385	TraesCS7D02G179000.1/TraesCS7D02G179600.1/TraesCS4A02G092800.1/TraesCS3A02G112900.1/TraesCS7B02G083100.1/TraesCS7B02G083500.1/TraesCS5A02G257700.1/TraesCS7D02G179100.1/TraesCS4D02G086200.1/TraesCS3D02G114800.1/TraesCS3A02G113000.1/TraesCS3D02G115000.1/TraesCS5D02G266000.1/TraesCS7A02G177700.1/TraesCS4D02G212300.1/TraesCS4D02G213300.1/TraesCS5B02G257000.1/TraesCS4A02G092900.1/TraesCS4B02G212300.1/…
PF02518: Histidine kinase-	22	0.728643	2.7667	3.10075e-09	2.38758e-07	1.89962e-07	2007	PB.30583.2/TraesCS2A02G033700.1/TraesCS2B02G047400.1/TraesCS7A02G242200.1/TraesCS7B02G149200.1/PB.13441.4/PB.13441.1/TraesCS5D02G258900.2/PB.13441.3/PB.13441.2/PB.33642.2/TraesCS7A02G529900.1/TraesCS5B02G249000.2/TraesCS7D02G241100.1/PB.25900.1/TraesCS5A02G251000.1
PF06723: MreB/Mbl protein	48	0.570697	2.66374	1.01572e-08	6.51756e-07	5.18554e-07	2167	PB.4802.3/TraesCS3B02G390700.1/TraesCS3B02G390800.1/PB.16957.1/TraesCS1B02G294300.1/PB.1341.6/PB.3685.2/PB.4103.2/PB.3685.3/TraesCS3D02G351900.1/TraesCS4D02G207500.1/PB.22621.3/TraesCS4A02G097900.1/PB.1810.3/TraesCS4B02G206700.1/TraesCSU02G116400.1/PB.22074.1/TraesCS1D02G131800.1/PB.1341.5/TraesCS1D02G121000.1/PB.266.1/TraesCS5A02G268100.1/TraesCS4D02G206600.1/TraesCS4B02G397600.1/TraesCS1A02G295…
PF00012: Hsp70 protein	59	0.526065	2.55933	1.23298e-08	6.78138e-07	5.39544e-07	2167	PB.4802.3/TraesCS3B02G390700.1/TraesCS3B02G390800.1/PB.16957.1/TraesCS1B02G294300.1/PB.1341.6/PB.3685.2/PB.4103.2/PB.3685.3/TraesCS3D02G351900.1/PB.266.3/TraesCS4D02G207500.1/PB.22621.3/TraesCS4A02G097900.1/PB.1810.3/TraesCS4B02G206700.1/TraesCSU02G116400.1/PB.22074.1/TraesCS4B02G243400.1/TraesCS1D02G131800.1/PB.1341.5/TraesCS1D02G121000.1/PB.266.1/TraesCS5A02G268100.1/PB.27753.2/TraesCS4D02G2066…
PF00447: HSF-type DNA-binding	40	0.602141	2.6753	1.88398e-08	9.06666e-07	7.21366e-07	3009	PB.49804.2/PB.47320.3/PB.31121.1/PB.18039.1/TraesCS1A02G375600.1/TraesCS2A02G401600.1/PB.6513.7/PB.2006.4/PB.36406.6/PB.36406.2/TraesCS1B02G396000.1/PB.49804.1/PB.30091.3/TraesCS2D02G399000.1/TraesCS7D02G270600.1/PB.4330.10/TraesCS4A02G027700.1/PB.43795.6/TraesCS4B02G278100.1/TraesCS7A02G270100.1/TraesCS4D02G276500.1/TraesCS7A02G360400.1/PB.6513.3/PB.33784.5/TraesCS1D02G382900.1
PF13589: Histidine kinase-	21	0.718774	2.68434	3.72148e-08	1.59197e-06	1.26661e-06	1346	PB.30583.2/TraesCS2A02G033700.1/TraesCS2B02G047400.1/TraesCS7A02G242200.1/TraesCS7B02G149200.1/PB.13441.4/PB.13441.1/TraesCS5D02G258900.2/PB.13441.3/PB.13441.2/PB.33642.2/TraesCS7A02G529900.1/TraesCS5B02G249000.2/TraesCS7D02G241100.1
PF00161: Ribosome inactivating protein	15	-0.785629	-2.91347	5.21734e-08	2.00867e-06	1.59815e-06	1548	TraesCSU02G183200.1/TraesCS3B02G604900.1/PB.45160.1/TraesCS5A02G474900.1/PB.50530.1/TraesCSU02G183400.1/TraesCS5B02G488800.1/PB.32819.2/TraesCS5A02G475500.2/TraesCS5A02G475500.1/PB.32820.1
PF00280: Potato inhibitor I family	29	-0.610919	-2.78091	2.31451e-07	8.10078e-06	6.44518e-06	2921	PB.5623.5/TraesCS3A02G093900.1/PB.3364.4/PB.5626.2/TraesCS2D02G165800.1/PB.20118.1/PB.76.3/PB.5625.1/PB.76.1/PB.3362.4/PB.5623.2/PB.50525.2/PB.3363.2/TraesCS1B02G034300.1/PB.5624.1/TraesCS1B02G034400.1/PB.5626.1/TraesCS1B02G034200.1/PB.5623.4/PB.3364.5/PB.1093.1/TraesCS1B02G035000.1
PF00234: Protease inhibitor/seed storage/LTP family	114	0.391141	2.19076	8.63184e-07	2.76938e-05	2.20339e-05	2474	PB.38909.124/PB.38909.141/TraesCS7A02G035200.1/TraesCSU02G265913.1/TraesCS6B02G066001.1/PB.50460.55/TraesCS7A02G035300.1/TraesCSU02G149938.1/PB.50460.4/PB.38909.145/PB.38909.173/TraesCS6B02G066000.1/PB.50460.42/PB.38909.179/TraesCS2A02G534000.1/TraesCSU02G057100.1/TraesCS3B02G063500.1/TraesCS3B02G062700.1/TraesCS1A02G048700.1/TraesCS1D02G001000.1/TraesCSU02G147100.1/PB.50768.1/TraesCSU02G147200.1…
PF00448: SRP54-type protein	11	-0.806363	-2.61341	9.38215e-07	2.77856e-05	2.21069e-05	2124	TraesCS3B02G561300.1/PB.30284.1/TraesCS6B02G129300.1/PB.20956.3/PB.20956.6/PB.16433.3/PB.20956.4/PB.20956.1/PB.16433.6/PB.16433.5
PF00226: DnaJ domain	57	0.489525	2.38296	1.46927e-06	4.04049e-05	3.21472e-05	3945	TraesCS3A02G216800.1/TraesCS5D02G434100.1/TraesCS1D02G403500.1/TraesCS1B02G423600.1/PB.43260.5/TraesCS7B02G064000.1/TraesCS1A02G395300.1/PB.45475.7/TraesCS4A02G116800.1/TraesCS5B02G428000.1/TraesCS5A02G426100.1/TraesCS6D02G293800.1/PB.6561.3/TraesCS4A02G110600.1/TraesCS7A02G159600.1/TraesCS3D02G218800.1/PB.27586.3/PB.7869.2/PB.2037.3/TraesCS7B02G064100.1/TraesCS4B02G187600.1/TraesCS4D02G194500.1/…
PF05621: Bacterial TniB protein	13	0.764292	2.44134	1.83272e-06	4.70398e-05	3.7426e-05	2480	TraesCS3A02G274400.1/TraesCS3B02G308100.1/TraesCS3D02G273600.1/TraesCS5A02G547300.1/TraesCSU02G131300.1/TraesCS4B02G380800.1/PB.30302.1/TraesCS1A02G340100.1/TraesCS1B02G352400.1/TraesCS5A02G062800.1/TraesCS1D02G342100.1
PF17871: AAA lid domain	18	0.67039	2.34845	8.78841e-06	0.000211471	0.000168252	2504	TraesCS3A02G274400.1/TraesCS3B02G308100.1/TraesCS3D02G273600.1/TraesCS5A02G547300.1/TraesCSU02G131300.1/TraesCS4B02G380800.1/TraesCS6B02G174500.1/TraesCS1A02G340100.1/TraesCS5B02G423000.1/TraesCS1B02G352400.1/TraesCS6D02G135600.1/TraesCS5A02G062800.1/TraesCS1D02G342100.1/TraesCS6A02G146400.1
PF12609: Wound-induced protein	24	-0.579277	-2.49866	1.32181e-05	0.000299352	0.000238172	1271	TraesCS2D02G534200.1/TraesCS2D02G533100.1/TraesCS2D02G487000.1/TraesCS2D02G533700.1/TraesCS2D02G487200.1/TraesCS2D02G533500.1/TraesCS2D02G487100.1/TraesCS2D02G534500.1/TraesCS2D02G533600.1/PB.13294.1/TraesCS2D02G533800.1
PF13173: AAA domain	18	0.641033	2.24561	4.122e-05	0.000881649	0.000701463	2504	TraesCS3A02G274400.1/TraesCS3B02G308100.1/TraesCS3D02G273600.1/TraesCS5A02G547300.1/TraesCSU02G131300.1/TraesCS4B02G380800.1/TraesCS6B02G174500.1/TraesCS1A02G340100.1/TraesCS1B02G352400.1/TraesCS6D02G135600.1/TraesCS1D02G342100.1/TraesCS6A02G146400.1
PF02861: Clp amino terminal domain	18	0.639847	2.24145	4.40791e-05	0.000893182	0.000710639	2504	TraesCS3A02G274400.1/TraesCS3B02G308100.1/TraesCS3D02G273600.1/TraesCS5A02G547300.1/TraesCSU02G131300.1/TraesCS4B02G380800.1/PB.30302.1/TraesCS6B02G174500.1/TraesCS1A02G340100.1/TraesCS1B02G352400.1/TraesCS6D02G135600.1/TraesCS1D02G342100.1/TraesCS6A02G146400.1
PF00910: RNA helicase	16	0.654898	2.22942	4.76774e-05	0.00091779	0.000730217	2692	TraesCS3A02G274400.1/TraesCS3B02G308100.1/TraesCS3D02G273600.1/TraesCS5A02G547300.1/TraesCSU02G131300.1/TraesCS4B02G380800.1/TraesCS1A02G340100.1/TraesCS5B02G423000.1/TraesCS1B02G352400.1/TraesCS1D02G342100.1/TraesCS2D02G353100.1
PF13016: Cys-rich Gliadin N-terminal	50	0.443119	2.09431	0.000112725	0.00206663	0.00164426	2424	PB.38909.141/TraesCS7A02G035200.1/TraesCSU02G265913.1/TraesCS6B02G066001.1/PB.50460.55/TraesCS7A02G035300.1/TraesCSU02G149938.1/PB.50460.4/PB.38909.145/PB.38909.173/TraesCS6B02G066000.1/TraesCS1D02G001000.1/PB.5576.12/PB.38909.113/TraesCS6B02G066100.1/TraesCSU02G267761.1/TraesCS6B02G065900.1/TraesCS6B02G065800.1/TraesCSU02G255529.1/TraesCS6B02G065856.1
PF01556: DnaJ C terminal domain	13	0.689705	2.20309	0.000132228	0.00231398	0.00184106	3243	PB.35344.4/TraesCS5D02G434100.1/TraesCS1D02G403500.1/TraesCS1B02G423600.1/TraesCS1A02G395300.1/TraesCS5B02G428000.1/TraesCS5A02G426100.1/PB.30064.2/PB.24754.1/TraesCS1D02G107200.1/TraesCS7A02G051000.1
PF10431: C-terminal	25	0.556978	2.19672	0.000156988	0.00262785	0.00209078	2504	TraesCS3A02G274400.1/TraesCS3B02G308100.1/TraesCS3D02G273600.1/TraesCS5A02G547300.1/TraesCSU02G131300.1/TraesCS4B02G380800.1/PB.30302.1/TraesCS6B02G174500.1/TraesCS1A02G340100.1/TraesCS5B02G423000.1/TraesCS1B02G352400.1/TraesCS6D02G135600.1/TraesCS5A02G062800.1/TraesCS1D02G342100.1/TraesCS6A02G146400.1
PF04969: CS domain	17	0.626122	2.16567	0.000219875	0.00352716	0.0028063	3377	PB.21716.4/TraesCS2D02G311400.1/TraesCS3D02G227500.5/TraesCS3A02G294500.1/TraesCS3B02G329100.1/TraesCS7B02G094500.1/TraesCS3D02G294300.1/TraesCS1B02G068200.1/TraesCS2A02G312900.1/PB.48046.1/PB.48046.2/PB.43333.1/TraesCS1D02G053500.1
PF12775: P-loop containing dynein motor region	10	0.73012	2.11783	0.000287689	0.00443041	0.00352495	2480	TraesCS3A02G274400.1/TraesCS3B02G308100.1/TraesCS3D02G273600.1/TraesCS1A02G340100.1/TraesCS5B02G423000.1/TraesCS1B02G352400.1/TraesCS5A02G062800.1/TraesCS1D02G342100.1
PF00158: Sigma-54 interaction domain	24	0.538348	2.10038	0.000307586	0.00455465	0.00362379	2504	TraesCS3A02G274400.1/TraesCS3B02G308100.1/TraesCS3D02G273600.1/TraesCS5A02G547300.1/TraesCSU02G131300.1/TraesCS4B02G380800.1/TraesCS6B02G174500.1/TraesCS1A02G340100.1/TraesCS5B02G423000.1/TraesCS1B02G352400.1/TraesCS6D02G135600.1/TraesCS5A02G062800.1/TraesCS1D02G342100.1/TraesCS6A02G146400.1
PF13181: Tetratricopeptide repeat	44	0.427697	1.96009	0.000374793	0.00534427	0.00425203	4002	PB.7318.1/TraesCS2D02G276000.2/TraesCS2A02G277100.1/TraesCS2B02G063900.1/TraesCS5D02G014700.1/PB.21716.4/TraesCS2B02G404400.1/TraesCS3D02G227500.5/PB.7616.3/TraesCS2A02G386800.1/TraesCS2D02G383600.1/TraesCS5A02G009800.1/PB.41666.1/PB.7318.4/TraesCS7A02G257100.1/PB.12999.2/TraesCS3A02G537600.1/TraesCS2A02G050600.1/TraesCS7D02G257300.1/TraesCS6A02G238600.1/PB.48217.2/PB.37462.4/PB.37462.2/PB.6736.6
PF02969: TATA box binding protein associated factor (TAF)	50	-0.378113	-2.00594	0.000551335	0.00758086	0.00603152	5005	TraesCS6B02G078600.1/TraesCS1B02G097900.1/TraesCS1A02G287800.1/TraesCS6A02G055400.1/TraesCS2B02G492400.1/TraesCS6A02G055200.1/TraesCS1A02G363000.1/TraesCS1D02G002300.2/TraesCS6A02G062800.1/TraesCS1A02G262000.1/TraesCS1D02G364400.1/TraesCS1A02G360100.1/TraesCSU02G121200.1/TraesCS6B02G084100.1/TraesCS1D02G286600.1/TraesCS6B02G084300.1/TraesCS1A02G359900.1/TraesCSU02G175900.1/TraesCS1D02G262000.1/Tr…
PF15511: Centromere kinetochore component CENP-T histone fold	49	-0.375091	-1.98524	0.00059008	0.00783382	0.00623279	5005	TraesCS6B02G078600.1/TraesCS1B02G097900.1/TraesCS1A02G287800.1/TraesCS6A02G055400.1/TraesCS2B02G492400.1/TraesCS6A02G055200.1/TraesCS1A02G363000.1/TraesCS6A02G062800.1/TraesCS1A02G262000.1/TraesCS1D02G364400.1/TraesCS1A02G360100.1/TraesCSU02G121200.1/TraesCS6B02G084100.1/TraesCS1D02G286600.1/TraesCS6B02G084300.1/TraesCS1A02G359900.1/TraesCSU02G175900.1/TraesCS1D02G262000.1/TraesCS6D02G063300.1/Tr…
PF00190: Cupin	33	-0.425544	-1.99522	0.00068122	0.00874232	0.00695562	3655	TraesCS1A02G066100.1/TraesCS5A02G044300.1/PB.26768.15/PB.27070.28/TraesCS6A02G383000.1/PB.24483.6/PB.28042.3/PB.28042.2/PB.24862.13/TraesCS4A02G296100.1/PB.28042.1/TraesCS4A02G041700.1/TraesCS4B02G017500.1/TraesCS4A02G279100.1/PB.24483.14/PB.28042.6/TraesCS5D02G360600.1/TraesCS5D02G054300.1/TraesCS6B02G422100.1/PB.2285.2
PF00254: FKBP-type peptidyl-prolyl cis-trans isomerase	20	0.57017	2.09271	0.000887661	0.0110242	0.00877112	4057	PB.9403.1/PB.7318.1/TraesCS2D02G276000.2/TraesCS2A02G277100.1/TraesCS2B02G063900.1/PB.14071.3/TraesCS1B02G292400.1/PB.44689.1/TraesCS7A02G257100.1/TraesCS2A02G050600.1/TraesCS7D02G257300.1/PB.48217.2/PB.6736.6/TraesCS6B02G171400.1
PF03732: Retrotransposon gag protein	29	0.47729	1.95999	0.000929035	0.0111774	0.00889306	1693	PB.34360.1/PB.24759.1/PB.24514.1/PB.488.1/PB.48876.1/PB.15007.1/PB.213.6/PB.32382.1/PB.13535.1/PB.45830.1/PB.213.5/TraesCS6B02G229900.1/PB.24438.2
PF00083: Sugar (and other) transporter	33	-0.418004	-1.95987	0.00101845	0.0116742	0.00928833	4375	TraesCSU02G196200.1/TraesCS2B02G218700.1/PB.1583.1/TraesCS2D02G264200.1/TraesCS2B02G232900.1/TraesCS3D02G188100.2/TraesCSU02G191400.2/TraesCS5A02G189500.1/TraesCS4A02G066200.1/TraesCS4D02G243100.1/TraesCS5B02G193700.1/TraesCS7A02G516600.1/TraesCS4B02G243500.1/TraesCS4B02G371700.1/TraesCS2A02G259500.1/TraesCS5B02G542900.1/TraesCSU02G023500.3/PB.50813.2/TraesCS2D02G483300.1/TraesCS2A02G205500.1/Tra…
PF01373: Glycosyl hydrolase family 14	15	-0.587147	-2.17741	0.00104574	0.0116742	0.00928833	2022	TraesCS6B02G116400.2/PB.30315.34/PB.30315.47/PB.27028.15/TraesCS4D02G339400.1/TraesCS2B02G240100.2/TraesCS5A02G513200.1/PB.27028.22/PB.27028.17/PB.27028.14/PB.27028.13/TraesCS4B02G393500.1
PF07883: Cupin domain	23	-0.511578	-2.1718	0.0010613	0.0116742	0.00928833	3655	TraesCS1A02G066100.1/TraesCS5A02G044300.1/PB.27070.28/TraesCS6A02G383000.1/PB.24483.6/PB.28042.3/TraesCS4A02G296100.1/TraesCS4B02G017500.1/TraesCS4A02G279100.1/TraesCS3A02G044800.1/TraesCS2A02G236200.1/TraesCS5D02G360600.1/TraesCS5D02G054300.1/TraesCS6B02G422100.1/TraesCS5D02G111200.1
PF05496: Holliday junction DNA helicase RuvB P-loop domain	28	0.497494	2.03045	0.00109744	0.0117366	0.00933791	2692	TraesCS3A02G274400.1/TraesCS3B02G308100.1/TraesCS3D02G273600.1/TraesCS5A02G547300.1/TraesCS5D02G522900.1/TraesCSU02G131300.1/TraesCSU02G222500.1/TraesCS4B02G380800.1/TraesCS6B02G174500.1/TraesCS1A02G340100.1/TraesCS1B02G352400.1/TraesCS6D02G135600.1/TraesCS1D02G342100.1/TraesCS6A02G146400.1/TraesCS2D02G353100.1
PF05699: hAT family C-terminal dimerisation region	26	-0.459363	-2.02432	0.00133349	0.0138755	0.0110397	1277	PB.45125.2/PB.14762.2/PB.37859.1/PB.14562.1/PB.8040.1/PB.9587.1/PB.18543.1/PB.32499.1/PB.825.1
PF01925: Sulfite exporter TauE/SafE	10	-0.65409	-2.05116	0.00147857	0.0149802	0.0119186	3178	PB.26574.5/PB.28604.3/TraesCS4D02G200900.1/PB.26574.6/PB.26574.4/PB.26574.2/TraesCS4A02G104000.1/PB.26574.3
PF00166: Chaperonin 10 Kd subunit	11	0.629486	1.90047	0.00157215	0.01552	0.0123481	4977	PB.45477.4/PB.34870.2/TraesCS1B02G228500.1/TraesCS5B02G211200.1/PB.30917.2/TraesCS2A02G146000.1/TraesCS2D02G150600.1/TraesCS5D02G219500.1/TraesCS5B02G211200.2/TraesCS1D02G217600.1/TraesCS7A02G161000.1
PF02179: BAG domain	18	0.552334	1.93488	0.00177484	0.0168737	0.0134252	3928	TraesCS6D02G393700.1/TraesCS5D02G319300.3/TraesCS7B02G388700.1/TraesCS2B02G485500.1/TraesCS7B02G388700.2/TraesCS7B02G388700.4/TraesCS6B02G456700.1/TraesCS6B02G456600.1/TraesCS4D02G357900.6/TraesCS7D02G050300.1/PB.20810.1/PB.30307.1/TraesCS7B02G388700.3
PF13976: GAG-pre-integrase domain	18	0.550525	1.92855	0.00183766	0.0168737	0.0134252	1444	PB.34360.1/PB.24514.1/PB.48876.1/PB.213.6/PB.9899.1/PB.13535.1/PB.1988.4/PB.37475.1/PB.213.5
PF16211: C-terminus of histone H2A	40	-0.385393	-1.91548	0.00184077	0.0168737	0.0134252	3768	TraesCS6B02G058400.1/TraesCS6A02G034800.1/PB.40052.2/TraesCS6D02G040800.1/TraesCS6B02G049500.1/TraesCS4A02G100100.1/TraesCS5B02G243500.1/TraesCS6D02G040300.1/TraesCS7B02G337400.1/TraesCS6B02G048700.1/TraesCS6B02G049000.1/TraesCS5D02G474800.1/TraesCS7B02G050300.1/TraesCS1B02G296300.1/TraesCS6D02G040400.1/TraesCS1D02G285800.1/TraesCS6D02G040500.1/TraesCS7A02G147200.1/TraesCS5A02G098300.1/TraesCS5B0…
PF13456: Reverse transcriptase-like	22	0.520893	1.97786	0.00194042	0.0173735	0.0138228	3520	PB.31880.1/PB.10876.1/PB.409.1/PB.46423.1/PB.42034.1/TraesCS6B02G395900.1/PB.46290.1/PB.7644.1/PB.43930.1/PB.29576.1/PB.33138.1/PB.37515.1/PB.23274.11/PB.31446.1/PB.8462.2
PF01657: Salt stress response/antifungal	13	0.609442	1.94671	0.00209565	0.0183369	0.0145893	4866	PB.40072.1/TraesCS2B02G241800.1/TraesCS1D02G076200.1/TraesCS4D02G338100.1/TraesCS2B02G242100.2/PB.10637.1/TraesCS2A02G216800.1/TraesCS2B02G242100.1/TraesCS3D02G125000.1/TraesCS3B02G345200.1/TraesCS2B02G241600.1/TraesCS1A02G273600.1
PF04927: Seed maturation protein	10	-0.63026	-1.97644	0.00264415	0.0226222	0.0179988	4967	PB.33008.2/TraesCS5A02G021400.1/TraesCS4A02G030600.1/TraesCS7D02G340400.1/TraesCS5A02G385600.1/TraesCS5D02G395600.1/PB.33923.1/TraesCS5A02G385700.1/TraesCS7B02G244300.1
PF00394: Multicopper oxidase	14	0.573469	1.87772	0.00290972	0.0233384	0.0185686	3343	TraesCS7D02G361200.1/TraesCS7B02G265300.1/TraesCS4D02G190900.1/TraesCS7A02G008900.1/TraesCS4B02G189500.1/TraesCS7D02G361300.1/TraesCS4D02G035000.1/TraesCS4A02G486100.1/TraesCS7D02G008600.1
PF07731: Multicopper oxidase	14	0.573469	1.87772	0.00290972	0.0233384	0.0185686	3343	TraesCS7D02G361200.1/TraesCS7B02G265300.1/TraesCS4D02G190900.1/TraesCS7A02G008900.1/TraesCS4B02G189500.1/TraesCS7D02G361300.1/TraesCS4D02G035000.1/TraesCS4A02G486100.1/TraesCS7D02G008600.1
PF07732: Multicopper oxidase	14	0.573469	1.87772	0.00290972	0.0233384	0.0185686	3343	TraesCS7D02G361200.1/TraesCS7B02G265300.1/TraesCS4D02G190900.1/TraesCS7A02G008900.1/TraesCS4B02G189500.1/TraesCS7D02G361300.1/TraesCS4D02G035000.1/TraesCS4A02G486100.1/TraesCS7D02G008600.1
PF13401: AAA domain	43	0.410383	1.86745	0.00297947	0.0234102	0.0186257	2692	TraesCS5B02G289800.1/TraesCS3A02G274400.1/TraesCS3B02G308100.1/TraesCS3D02G273600.1/TraesCS5A02G547300.1/TraesCS7A02G562900.1/TraesCSU02G131300.1/TraesCS4B02G380800.1/TraesCS4A02G349800.1/TraesCS6B02G174500.1/TraesCSU02G000800.1/TraesCS1A02G340100.1/TraesCS5B02G423000.1/TraesCS1B02G352400.1/TraesCS6D02G135600.1/TraesCS5A02G062800.1/TraesCS1D02G342100.1/TraesCS6A02G146400.1/TraesCS2D02G353100.1
PF01694: Rhomboid family	11	0.602519	1.81906	0.00333063	0.0252262	0.0200706	4779	PB.15795.1/TraesCS1B02G258700.1/TraesCS5A02G526000.1/TraesCS1A02G248200.1/TraesCS3D02G393100.1/PB.27374.2/TraesCS1A02G188900.1/TraesCS1D02G187500.1/PB.31555.1/TraesCS1B02G196600.1
PF07762: Protein of unknown function (DUF1618)	52	-0.346004	-1.86173	0.00334165	0.0252262	0.0200706	2442	PB.11145.3/TraesCS5B02G454800.1/TraesCS3B02G283500.1/PB.32754.1/TraesCS6A02G322300.1/TraesCSU02G154400.1/TraesCS5B02G513800.1/TraesCS5D02G343900.1/TraesCS3B02G283100.3/TraesCS5B02G456000.1/TraesCS5D02G049000.1/PB.19284.1/TraesCS5B02G454500.1/PB.34062.1/TraesCS5B02G455300.1/TraesCSU02G149400.1/TraesCS5B02G454300.1/TraesCS5B02G451900.1/PB.23281.1/PB.32751.1/TraesCS5B02G455200.1
PF01695: IstB-like ATP binding protein	19	0.519408	1.86529	0.00350407	0.0259436	0.0206414	2480	TraesCS3A02G274400.1/TraesCS3B02G308100.1/TraesCS3D02G273600.1/TraesCS5A02G547300.1/TraesCSU02G131300.1/TraesCS4B02G380800.1/PB.30302.1/TraesCS1A02G340100.1/TraesCS1B02G352400.1/TraesCS1D02G342100.1
PF17207: MCM OB domain	11	-0.607177	-1.96785	0.00438081	0.0315946	0.0251375	5277	PB.40968.1/TraesCS3D02G203400.1/TraesCS1B02G274600.1/TraesCS6A02G360600.1/TraesCS1D02G298400.2/TraesCS5D02G100800.1/TraesCS1A02G288700.1/TraesCS5B02G094600.1/TraesCS1D02G125300.1/TraesCS6D02G344100.2
PF13537: Glutamine amidotransferase domain	11	-0.606907	-1.96698	0.00443145	0.0315946	0.0251375	3775	PB.14863.3/TraesCS4D02G195100.1/PB.20086.2/PB.31965.2/TraesCS3A02G077100.1/PB.20086.1/TraesCS5D02G159100.1/PB.29412.2/TraesCS4A02G109900.1
PF14551: MCM N-terminal domain	10	-0.607132	-1.90391	0.00451607	0.0316125	0.0251517	5277	PB.40968.1/TraesCS3D02G203400.1/TraesCS1B02G274600.1/TraesCS6A02G360600.1/TraesCS1D02G298400.2/TraesCS5D02G100800.1/TraesCS5B02G094600.1/TraesCS1D02G125300.1/TraesCS6D02G344100.2
PF02353: Mycolic acid cyclopropane synthetase	11	-0.601733	-1.95021	0.00524227	0.0360406	0.0286748	4209	TraesCS2A02G544800.4/TraesCS2A02G544500.3/PB.10661.1/TraesCS2B02G575100.4/TraesCS2A02G545000.1/PB.12010.1/TraesCS2A02G544500.9/TraesCS2A02G544500.7/TraesCSU02G022800.1/TraesCS2B02G575400.1
PF01566: Natural resistance-associated macrophage protein	10	-0.59808	-1.87552	0.00540847	0.0362944	0.0288768	1471	PB.28097.3/PB.30303.1/TraesCS2B02G133000.1/TraesCSU02G131600.1/TraesCS4B02G381200.1/TraesCSU02G131800.1/PB.50426.1
PF02902: Ulp1 protease family	20	-0.47742	-1.95395	0.00546773	0.0362944	0.0288768	1922	PB.15121.6/PB.36419.2/PB.14468.3/PB.32839.2/TraesCS6A02G415800.1/PB.14468.2/PB.418.2/PB.14468.4/PB.24411.1
PF00350: Dynamin family	11	-0.597612	-1.93685	0.00575121	0.0375291	0.0298591	1141	TraesCS7D02G150800.1/TraesCS7A02G149200.1/PB.49972.3/PB.49972.4/TraesCS5A02G114600.1
PF00182: Chitinase class I	11	-0.59718	-1.93545	0.005853	0.0375567	0.0298811	5411	TraesCS1D02G207100.1/TraesCS2B02G369000.1/TraesCS1D02G207000.1/TraesCS2D02G349000.1/TraesCS7B02G471400.1/TraesCS6B02G246800.1/TraesCS7B02G471500.1/TraesCS2D02G348900.1/TraesCS7A02G548000.1/PB.48909.1
PF10551: MULE transposase domain	37	-0.368385	-1.78497	0.00614861	0.0388068	0.0308757	2780	PB.23618.1/PB.26322.1/PB.35501.1/PB.10192.1/PB.46912.1/PB.24271.1/PB.7829.1/PB.46417.2/PB.14646.2/PB.47026.1/PB.15876.6/PB.6544.4/PB.23247.1/PB.31685.1/PB.43971.1/PB.1117.1/PB.15050.1
PF14510: ABC-transporter N-terminal	11	-0.593213	-1.92259	0.00626015	0.0388735	0.0309288	4057	TraesCS5D02G452500.1/TraesCS5A02G016200.1/TraesCS5D02G190600.1/TraesCS7D02G366600.1/TraesCS6B02G205900.1/TraesCS6A02G178500.1/TraesCS6D02G166100.1/TraesCS7A02G391100.1/TraesCS5D02G163700.1
PF07690: Major Facilitator Superfamily	44	-0.344165	-1.7416	0.00712309	0.04353	0.0346336	3948	TraesCSU02G196200.1/TraesCS2B02G218700.1/TraesCS2B02G626000.1/PB.1583.1/TraesCS2D02G264200.1/TraesCS2B02G232900.1/TraesCS3D02G188100.2/TraesCSU02G191400.2/TraesCS5A02G189500.1/TraesCS4A02G066200.1/TraesCS4D02G243100.1/TraesCS5B02G193700.1/TraesCS1A02G204300.1/TraesCS7A02G516600.1/TraesCS4B02G243500.1/TraesCS4B02G371700.1/TraesCS2A02G259500.1/TraesCS7D02G091600.1/TraesCS5B02G542900.1/TraesCSU02G02…
NES: normalized enrichment score

## Sheet: Table S9
Supplementary Table S9: Significantly enriched KEGG for DETs in Z168N vs. Y13N
ID	setSize	enrichmentScore	NES	pvalue	p.adjust	qvalues	rank	core_enrichment
Chaperones and folding catalysts [BR:ko03110]	426	0.49056	3.32467	1e-10	7.35e-09	6.05263e-09	2729	PB.22700.2/TraesCS5B02G212900.1/TraesCS7D02G179000.1/TraesCS7D02G179600.1/PB.44672.1/PB.23795.2/PB.9403.1/TraesCS4A02G092800.1/PB.7318.1/TraesCS3A02G112900.1/TraesCS7B02G083100.1/TraesCS7B02G083500.1/TraesCS7D02G189400.1/TraesCS5A02G257700.1/TraesCS2D02G276000.2/PB.30583.2/TraesCS2A02G277100.1/TraesCS7D02G179100.1/TraesCS4D02G086200.1/TraesCS3D02G114800.1/TraesCS3A02G113000.1/PB.48077.1/TraesCS7A…
Protein processing in endoplasmic reticulum [PATH:ko04141]	292	0.510958	3.32824	1e-10	7.35e-09	6.05263e-09	2729	PB.22700.2/TraesCS2D02G566500.1/TraesCS7D02G179000.1/TraesCS7D02G179600.1/PB.25337.1/PB.23795.2/TraesCS4A02G092800.1/TraesCS3A02G112900.1/TraesCS7B02G083100.1/TraesCS7B02G083500.1/TraesCS5A02G257700.1/PB.30583.2/TraesCS6B02G222800.1/TraesCS7D02G179100.1/TraesCS4D02G086200.1/TraesCS2B02G367600.1/TraesCS3D02G114800.1/TraesCS3A02G113000.1/PB.48077.1/PB.4802.3/TraesCS3B02G390700.1/TraesCS3D02G115000.…
Alcoholism [PATH:ko05034]	194	-0.342679	-2.45853	1e-10	7.35e-09	6.05263e-09	5148	TraesCS6A02G042700.1/TraesCS6D02G040200.1/TraesCS4A02G311600.1/TraesCS6D02G040700.1/TraesCS2D02G297000.1/TraesCS7A02G102900.1/TraesCS6B02G078600.1/TraesCS1B02G097900.1/TraesCS6A02G155800.1/TraesCS1A02G287800.1/TraesCS7A02G119900.1/TraesCS6B02G082400.1/TraesCSU02G182300.1/TraesCS7B02G019000.1/TraesCS2D02G056900.1/TraesCS6A02G055400.1/TraesCS2B02G492400.1/TraesCS1A02G306400.1/TraesCSU02G081100.1/Tr…
Systemic lupus erythematosus [PATH:ko05322]	175	-0.40768	-2.85822	1e-10	7.35e-09	6.05263e-09	5148	TraesCS6A02G042700.1/TraesCS6D02G040200.1/TraesCS4A02G311600.1/TraesCS6D02G040700.1/TraesCS2D02G297000.1/TraesCS7A02G102900.1/TraesCS6B02G078600.1/TraesCS1B02G097900.1/TraesCS6A02G155800.1/TraesCS1A02G287800.1/TraesCS7A02G119900.1/TraesCS6B02G082400.1/TraesCSU02G182300.1/TraesCS7B02G019000.1/TraesCS2D02G056900.1/TraesCS6A02G055400.1/TraesCS2B02G492400.1/TraesCS1A02G306400.1/TraesCSU02G081100.1/Tr…
Longevity regulating pathway - multiple species [PATH:ko04213]	93	0.48674	2.6141	3.81966e-10	2.24596e-08	1.84952e-08	3644	PB.19888.1/TraesCS3B02G544300.1/PB.27535.1/PB.4802.3/TraesCS3B02G390700.1/TraesCS3B02G390800.1/PB.16957.1/TraesCS1B02G294300.1/TraesCS3B02G545300.1/PB.1341.6/TraesCS3A02G274400.1/TraesCS3B02G308100.1/PB.3685.2/TraesCS3D02G273600.1/PB.22072.1/PB.4103.2/PB.3685.3/TraesCS3D02G351900.1/TraesCS5A02G547300.1/TraesCS4D02G207500.1/TraesCS4D02G170700.1/TraesCS4A02G097900.1/TraesCSU02G131300.1/TraesCS2B02G…
Lipid and atherosclerosis [PATH:ko05417]	102	0.450787	2.46447	1.37377e-08	6.73146e-07	5.54328e-07	2063	PB.30583.2/TraesCS6B02G222800.1/PB.4802.3/TraesCS3B02G390700.1/TraesCS3B02G390800.1/TraesCS2A02G033700.1/PB.16957.1/TraesCS1B02G294300.1/TraesCS2B02G047400.1/PB.1341.6/TraesCS7A02G242200.1/PB.3685.2/PB.22072.1/TraesCS7B02G149200.1/PB.13441.4/PB.13441.1/PB.4103.2/PB.3685.3/TraesCS3D02G351900.1/PB.266.3/TraesCS5D02G258900.2/TraesCS4D02G207500.1/PB.22621.3/PB.13441.3/TraesCS4A02G097900.1/PB.13441.2/…
Antigen processing and presentation [PATH:ko04612]	104	0.440626	2.4066	2.40671e-08	1.01082e-06	8.32397e-07	1954	PB.10368.2/PB.4802.3/TraesCS3B02G390700.1/TraesCS3B02G390800.1/TraesCS2A02G033700.1/PB.16957.1/TraesCS1B02G294300.1/TraesCS2B02G047400.1/PB.1341.6/TraesCS7A02G242200.1/PB.3685.2/PB.10368.1/PB.22072.1/TraesCS7B02G149200.1/PB.13441.4/PB.13441.1/PB.4103.2/PB.3685.3/TraesCS3D02G351900.1/PB.266.3/TraesCS4D02G207500.1/PB.22621.3/PB.13441.3/TraesCS4A02G097900.1/PB.13441.2/PB.1810.3/TraesCS4B02G206700.1/…
Toxoplasmosis [PATH:ko05145]	48	0.543889	2.53188	1.02715e-07	3.77479e-06	3.10849e-06	1954	PB.1179.2/PB.4802.3/TraesCS3B02G390700.1/TraesCS3B02G390800.1/PB.16957.1/PB.15610.2/TraesCS1B02G294300.1/PB.1341.6/PB.3685.2/PB.22072.1/PB.4103.2/PB.3685.3/TraesCS3D02G351900.1/TraesCS4D02G207500.1/TraesCS3A02G334200.1/TraesCS4A02G097900.1/PB.1810.3/TraesCS4B02G206700.1/PB.22074.1/TraesCS1D02G131800.1/PB.1341.5/TraesCS4D02G206600.1/TraesCS5A02G201700.1
Mitochondrial biogenesis [BR:ko03029]	322	0.292422	1.9305	4.99336e-07	1.63116e-05	1.34324e-05	4162	PB.19888.1/PB.819.1/PB.38854.1/TraesCS3B02G544300.1/TraesCS5B02G378500.1/TraesCS1A02G165500.1/PB.27535.1/TraesCS6A02G019900.1/TraesCS7B02G337000.1/PB.4802.3/TraesCS5B02G375700.1/TraesCS3B02G390700.1/PB.19432.4/TraesCS3B02G390800.1/TraesCS2A02G033700.1/PB.16957.1/TraesCS1B02G294300.1/TraesCS3B02G545300.1/TraesCS2B02G047400.1/PB.1341.6/TraesCS7A02G242200.1/PB.35344.4/TraesCS7B02G337300.1/PB.3685.2/…
Starch and sucrose metabolism [PATH:ko00500]	192	-0.279669	-2.00152	1.30233e-06	3.76616e-05	3.10139e-05	2407	TraesCS1B02G249000.1/TraesCS2B02G145700.1/PB.45539.1/TraesCS2A02G134300.1/PB.8248.3/TraesCS2D02G166600.1/TraesCS3B02G484000.1/TraesCS3B02G530500.1/PB.18820.2/TraesCS1D02G427400.2/TraesCS6D02G305000.1/PB.43464.6/TraesCS7A02G557600.1/PB.1925.3/TraesCS2D02G381100.1/TraesCS4B02G356800.1/PB.12992.3/PB.32184.3/PB.43464.3/TraesCS4D02G339400.1/TraesCS3D02G359200.1/TraesCS7B02G130200.1/TraesCS5B02G484700.…
Prostate cancer [PATH:ko05215]	28	0.607736	2.45635	1.40911e-06	3.76616e-05	3.10139e-05	2007	PB.30583.2/TraesCS6B02G222800.1/TraesCS2A02G033700.1/TraesCS2B02G047400.1/TraesCS7A02G242200.1/TraesCS7B02G149200.1/PB.13441.4/PB.13441.1/TraesCS5D02G258900.2/PB.13441.3/PB.13441.2/PB.7400.2/PB.33642.2/TraesCS7A02G529900.1/TraesCS5B02G249000.2/TraesCS7D02G241100.1/PB.45695.3/TraesCS5A02G251000.1
Measles [PATH:ko05162]	41	0.516175	2.32059	5.36677e-06	0.000131486	0.000108277	1954	TraesCS2B02G367600.1/PB.4802.3/TraesCS3B02G390700.1/TraesCS3B02G390800.1/PB.16957.1/TraesCS1B02G294300.1/PB.1341.6/PB.3685.2/PB.22072.1/PB.4103.2/PB.3685.3/TraesCS3D02G351900.1/TraesCS4D02G207500.1/TraesCS4A02G097900.1/PB.1810.3/TraesCS4B02G206700.1/PB.22074.1/TraesCS1D02G131800.1/PB.1341.5/TraesCS4D02G206600.1/TraesCS5A02G201700.1
Hedgehog signaling pathway [PATH:ko04340]	34	-0.507125	-2.46058	1.29657e-05	0.000293225	0.000241467	721	TraesCS5A02G474900.1/TraesCS5B02G386100.1/PB.24575.1/TraesCSU02G183400.1/TraesCS2D02G526900.1/TraesCS7B02G390000.1/TraesCS5B02G488800.1/TraesCS5A02G475500.2/TraesCS5A02G475500.1/TraesCS2A02G543300.1/TraesCS4A02G430500.1
Legionellosis [PATH:ko05134]	55	0.445138	2.14016	3.93139e-05	0.000825591	0.000679864	3839	PB.4802.3/TraesCS3B02G390700.1/TraesCS3B02G390800.1/PB.16957.1/TraesCS1B02G294300.1/PB.1341.6/PB.3685.2/PB.22072.1/PB.4103.2/PB.3685.3/TraesCS3D02G351900.1/TraesCS4D02G207500.1/TraesCS4A02G097900.1/PB.1810.3/TraesCS4B02G206700.1/PB.22074.1/TraesCS1D02G131800.1/PB.1341.5/TraesCS1D02G144000.1/TraesCS4D02G206600.1/TraesCS5A02G201700.1/TraesCS2B02G465300.1/TraesCS1A02G145000.1/TraesCS2D02G353100.1/Tr…
IL-17 signaling pathway [PATH:ko04657]	40	0.496028	2.2099	0.000102421	0.00199852	0.00164576	2418	PB.30583.2/TraesCS2A02G033700.1/TraesCS2B02G047400.1/TraesCS7A02G242200.1/TraesCS7B02G149200.1/PB.13441.4/PB.13441.1/TraesCS5D02G258900.2/PB.13441.3/PB.21814.1/PB.13441.2/PB.33642.2/TraesCS7A02G529900.1/TraesCS5B02G249000.2/TraesCS7D02G241100.1/PB.16685.5/PB.45695.3/TraesCS5A02G251000.1/TraesCS1D02G232100.1/TraesCS1A02G229900.1/PB.21814.5/PB.16685.3
Progesterone-mediated oocyte maturation [PATH:ko04914]	25	0.56792	2.26721	0.000108763	0.00199852	0.00164576	1714	PB.313.1/TraesCS2A02G033700.1/TraesCS2B02G047400.1/TraesCS7A02G242200.1/PB.10514.1/TraesCS7B02G149200.1/PB.13441.4/PB.13441.1/PB.13441.3/PB.13441.2/TraesCS1D02G226500.1/TraesCS7D02G241100.1/PB.45695.3
Viral carcinogenesis [PATH:ko05203]	142	-0.265355	-1.77846	0.000169278	0.00292752	0.00241078	4853	TraesCS3D02G530000.1/TraesCS2B02G257800.1/TraesCS1A02G287800.1/PB.9480.1/TraesCS4B02G021300.1/TraesCS6A02G055400.1/TraesCS2B02G492400.1/TraesCSU02G081100.1/TraesCS6B02G269200.1/TraesCS6A02G055200.1/TraesCS1B02G416600.1/TraesCS2A02G312400.1/PB.46422.1/TraesCS1A02G363000.1/TraesCS4B02G002800.1/TraesCS6A02G062800.1/TraesCS1A02G262000.1/TraesCS6B02G049300.1/TraesCS4D02G076900.1/TraesCS7B02G394100.1/P…
PI3K-Akt signaling pathway [PATH:ko04151]	55	0.418618	2.01266	0.000218601	0.00357048	0.00294024	3107	PB.19888.1/TraesCS3B02G544300.1/PB.27535.1/PB.30583.2/TraesCS6B02G222800.1/TraesCS2A02G033700.1/TraesCS3B02G545300.1/TraesCS2B02G047400.1/TraesCS7A02G242200.1/TraesCS7B02G149200.1/PB.13441.4/PB.13441.1/TraesCS5D02G258900.2/PB.13441.3/TraesCS4D02G170700.1/PB.13441.2/PB.33642.2/TraesCS7A02G529900.1/TraesCS5B02G249000.2/TraesCS7D02G241100.1/PB.45695.3/TraesCS5A02G251000.1/TraesCS3B02G169300.1/TraesC…
MAPK signaling pathway [PATH:ko04010]	55	0.407743	1.96037	0.000392704	0.00607657	0.00500398	1954	TraesCS6B02G222800.1/PB.4802.3/TraesCS3B02G390700.1/TraesCS3B02G390800.1/PB.16957.1/TraesCS1B02G294300.1/PB.1341.6/PB.3685.2/PB.22072.1/PB.4103.2/PB.3685.3/TraesCS3D02G351900.1/TraesCS4D02G207500.1/TraesCS4A02G097900.1/PB.1810.3/TraesCS4B02G206700.1/PB.22074.1/TraesCS1D02G131800.1/PB.1341.5/TraesCS4D02G206600.1/TraesCS5A02G201700.1
General function prediction only	10	0.71081	2.10864	0.000423989	0.00623264	0.0051325	2933	TraesCS2A02G568200.1/PB.12082.1/TraesCS3D02G221100.1/PB.15341.1/TraesCS2D02G578900.1/PB.17893.4/PB.15341.2/TraesCS3B02G597700.1/TraesCS3B02G261400.1
Amino sugar and nucleotide sugar metabolism [PATH:ko00520]	97	-0.296245	-1.84339	0.00056521	0.00791293	0.0065162	2376	TraesCS2A02G058100.1/PB.48683.4/PB.18820.2/TraesCS1D02G427400.2/TraesCS7B02G471400.1/TraesCS5B02G138700.2/TraesCS5D02G152100.1/TraesCS6B02G246800.1/TraesCS2B02G152300.1/TraesCS3A02G044800.1/TraesCS7B02G134900.1/TraesCS5B02G484700.1/TraesCS2D02G499000.1/PB.21363.1/PB.25225.1/TraesCS7B02G471500.1/PB.2093.9/PB.2093.11/TraesCS2D02G348900.1/PB.9725.5/TraesCS4D02G125100.2/TraesCS3A02G108500.1/TraesCS2D…
Proteasome [BR:ko03051]	99	0.339261	1.8414	0.000725128	0.00969034	0.00797987	2967	PB.4802.3/TraesCS3B02G390700.1/TraesCS3B02G390800.1/TraesCS2A02G033700.1/PB.16957.1/TraesCS1B02G294300.1/TraesCS2B02G047400.1/PB.1341.6/TraesCS7A02G242200.1/PB.3685.2/PB.22072.1/TraesCS7B02G149200.1/PB.43617.1/PB.13441.4/PB.13441.1/PB.4103.2/PB.3685.3/TraesCS3D02G351900.1/TraesCS4D02G207500.1/PB.13441.3/TraesCS4A02G097900.1/PB.13441.2/PB.1810.3/TraesCS4B02G206700.1/TraesCS7D02G241100.1/PB.22074.1…
Spliceosome [PATH:ko03040]	179	0.278955	1.70207	0.000783448	0.0100145	0.00824683	3606	PB.4802.3/TraesCS3B02G390700.1/TraesCS4A02G380600.1/TraesCS3B02G390800.1/PB.16957.1/TraesCS1B02G294300.1/PB.1341.6/PB.3685.2/TraesCS4B02G038900.1/PB.46710.1/TraesCS4D02G006000.1/PB.22072.1/TraesCS4D02G154600.1/TraesCS4D02G035800.1/PB.27118.3/PB.4103.2/PB.3685.3/TraesCS3D02G351900.1/PB.1276.2/PB.50656.3/TraesCS4D02G207500.1/TraesCS4A02G097900.1/PB.21814.1/PB.1810.3/TraesCS4B02G206700.1/TraesCS3D02…
Transcriptional misregulation in cancer [PATH:ko05202]	61	-0.356535	-1.99867	0.000874491	0.0107125	0.00882162	5535	TraesCS6D02G082800.1/TraesCSU02G093200.1/TraesCS4A02G236700.1/TraesCS4A02G057500.1/TraesCS1B02G378700.1/TraesCS3D02G202500.1/TraesCS2D02G297000.1/TraesCS7A02G102900.1/TraesCS6A02G155800.1/TraesCS7A02G119900.1/TraesCSU02G182300.1/TraesCS7B02G019000.1/TraesCS1A02G306400.1/TraesCS4B02G275500.1/TraesCS4A02G234800.1/TraesCS7B02G016900.1/TraesCS7B02G017600.1/TraesCS7D02G115400.1/TraesCS4D02G076900.1/Tr…
Hedgehog signaling pathway - fly [PATH:ko04341]	45	-0.384788	-1.98571	0.00120285	0.0139983	0.0115275	721	TraesCS5A02G474900.1/TraesCS5B02G386100.1/PB.24575.1/TraesCSU02G183400.1/TraesCS2A02G506300.1/TraesCS2D02G526900.1/TraesCS5B02G488800.1/TraesCS5A02G475500.2/TraesCS5A02G475500.1/TraesCS2A02G543300.1/TraesCS4A02G430500.1
Glutamatergic synapse [PATH:ko04724]	15	-0.571637	-2.13553	0.00123795	0.0139983	0.0115275	3110	TraesCS7B02G246900.3/TraesCS2D02G500600.1/PB.43911.1/TraesCS2B02G622500.1/TraesCS6A02G298100.2/TraesCS4A02G245500.1/TraesCS6B02G327500.1/TraesCS4D02G068700.1/TraesCS5D02G208300.2/PB.19127.1
Benzoxazinoid biosynthesis [PATH:ko00402]	25	-0.46452	-2.06372	0.00186528	0.0203109	0.0167258	2621	TraesCS5D02G014100.1/TraesCS2A02G046000.1/TraesCS5D02G014300.1/TraesCS2D02G044700.1/TraesCS5A02G008800.1/TraesCS5A02G008700.1/TraesCS5B02G500700.1/TraesCSU02G095600.1/TraesCS2B02G057900.1/TraesCS5B02G007200.1/PB.28920.1/TraesCS5A02G008900.1/TraesCS4B02G394700.1/TraesCS3D02G061900.1
Axon guidance [PATH:ko04360]	18	-0.524835	-2.08609	0.00280977	0.0295026	0.024295	4052	TraesCS3D02G395000.1/TraesCS3A02G400600.1/TraesCS7B02G246900.3/TraesCS3B02G433600.1/PB.43911.1/TraesCS2D02G504800.1/TraesCS5A02G478800.1/TraesCS5D02G492300.1/TraesCS4A02G245500.1/TraesCS3A02G155100.1/PB.24575.1/TraesCS4D02G068700.1/PB.19127.1
Salmonella infection [PATH:ko05132]	85	0.32568	1.72618	0.00305973	0.0310193	0.025544	3656	TraesCS1A02G101000.2/PB.30583.2/TraesCS7B02G377900.1/TraesCS2A02G033700.1/TraesCS2B02G047400.1/TraesCS7A02G242200.1/TraesCS5A02G125500.1/TraesCS7B02G149200.1/TraesCS3A02G088000.1/PB.13441.4/PB.13441.1/TraesCS5D02G258900.2/PB.13441.3/PB.13441.2/TraesCS5D02G133200.1/PB.49264.1/PB.33642.2/TraesCS7A02G529900.1/TraesCS5B02G249000.2/TraesCS7D02G241100.1/PB.15611.1/TraesCS5A02G069800.2/PB.45695.3/TraesC…
Chemical carcinogenesis - receptor activation [PATH:ko05207]	67	0.347307	1.75129	0.00391565	0.0383733	0.0315999	2045	TraesCS2B02G362200.1/PB.30583.2/TraesCS6B02G222800.1/TraesCS2A02G033700.1/TraesCS2B02G047400.1/TraesCS2D02G480100.1/TraesCS7A02G242200.1/TraesCS7B02G149200.1/PB.13441.4/PB.13441.1/TraesCS5D02G258900.2/PB.13441.3/PB.13441.2/PB.33642.2/TraesCS7A02G529900.1/TraesCS5B02G249000.2/TraesCS7B02G128800.1/TraesCS7D02G241100.1/PB.45695.3/TraesCS3A02G476700.1/PB.41124.1/TraesCS5A02G251000.1/TraesCS1B02G06820…
NES: normalized enrichment score

## Sheet: Table S10
Supplementary Table S10: Significantly enriched GO terms for DETs in Z168N vs. Y13N
ID	setSize	enrichmentScore	NES	pvalue	p.adjust	qvalues	rank	core_enrichment
BP: protein folding (GO:0006457)	147	0.445798	2.63716	1e-10	1.15429e-08	1.05263e-08	2729	PB.30583.2/PB.48077.1/PB.4802.3/PB.26131.1/TraesCS2A02G033700.1/TraesCS2B02G047400.1/PB.1341.6/PB.23138.5/TraesCS7A02G242200.1/PB.35344.4/PB.3685.2/PB.38054.2/TraesCS7B02G109100.1/TraesCS5D02G434100.1/TraesCS1D02G403500.1/TraesCS1B02G423600.1/PB.46478.1/TraesCS7B02G149200.1/TraesCS3B02G130400.1/TraesCS1A02G395300.1/TraesCS7A02G202200.1/PB.13441.4/PB.13441.1/TraesCS3B02G131000.1/PB.3685.3/TraesCS5…
BP: response to heat (GO:0009408)	113	0.625665	3.51839	1e-10	1.15429e-08	1.05263e-08	3330	PB.22700.2/TraesCS7D02G179000.1/TraesCS7D02G179600.1/TraesCS3A02G112900.1/TraesCS7B02G083100.1/TraesCS7B02G083500.1/TraesCS7D02G179100.1/TraesCS4D02G086200.1/TraesCS3D02G114800.1/TraesCS3A02G113000.1/PB.48077.1/TraesCS3D02G115000.1/PB.26131.1/TraesCS7A02G177700.1/PB.23138.5/PB.35344.4/PB.38054.2/TraesCS7B02G109100.1/TraesCS5D02G434100.1/PB.26613.3/TraesCS2B02G329900.1/PB.46478.1/TraesCS7A02G23250…
BP: response to hydrogen peroxide (GO:0042542)	46	0.635059	2.96741	1e-10	1.15429e-08	1.05263e-08	3692	PB.48077.1/PB.26131.1/PB.23138.5/PB.38054.2/PB.1870.1/PB.46478.1/PB.27664.3/TraesCS3B02G130400.1/TraesCS3B02G131000.1/PB.45039.1/PB.25513.1/TraesCS3D02G115100.1/TraesCS3B02G130300.1/PB.30738.1/TraesCS3B02G130900.1/TraesCS3D02G114900.1/TraesCS6A02G181700.1/TraesCS3D02G046800.1/TraesCS3D02G115200.1/TraesCS6D02G169100.1/TraesCS6B02G210600.1/PB.22685.4/TraesCS3B02G049900.1/PB.23812.1/PB.28585.1/PB.26…
CC: nucleosome (GO:0000786)	182	-0.384447	-2.62176	1e-10	1.15429e-08	1.05263e-08	5201	PB.35221.1/TraesCS1B02G378700.1/TraesCS6A02G042700.1/TraesCS6D02G040200.1/TraesCS4A02G311600.1/TraesCS6D02G040700.1/TraesCS2D02G297000.1/TraesCS7A02G102900.1/TraesCS6B02G078600.1/TraesCS1B02G097900.1/TraesCS6A02G155800.1/TraesCS1A02G287800.1/TraesCS7A02G119900.1/TraesCS6B02G082400.1/TraesCSU02G182300.1/TraesCS7B02G019000.1/TraesCS6A02G055400.1/TraesCS2B02G492400.1/TraesCS1A02G306400.1/TraesCSU02G…
MF: protein heterodimerization activity (GO:0046982)	193	-0.352804	-2.4821	1e-10	1.15429e-08	1.05263e-08	5148	TraesCS6A02G042700.1/TraesCS6D02G040200.1/TraesCS4A02G311600.1/TraesCS6D02G040700.1/TraesCS2D02G297000.1/TraesCS7A02G102900.1/TraesCS6B02G078600.1/TraesCS1B02G097900.1/TraesCS6A02G155800.1/TraesCS1A02G287800.1/TraesCS7A02G119900.1/TraesCS6B02G082400.1/TraesCSU02G182300.1/TraesCS7B02G019000.1/TraesCS6A02G055400.1/TraesCS2B02G492400.1/TraesCS1A02G306400.1/TraesCSU02G081100.1/TraesCS4B02G275500.1/Tr…
MF: serine-type endopeptidase inhibitor activity (GO:0004867)	70	-0.533848	-2.98442	1e-10	1.15429e-08	1.05263e-08	3034	TraesCS1A02G265700.1/PB.17431.2/PB.5623.5/TraesCS3A02G093900.1/PB.3364.4/PB.5626.2/TraesCS2D02G165800.1/PB.20118.1/PB.76.3/PB.34286.4/PB.5625.1/TraesCS3D02G034100.1/PB.76.1/PB.16086.1/PB.40104.3/PB.36723.1/PB.3362.4/TraesCS1B02G276800.1/TraesCS1D02G266000.1/PB.5623.2/TraesCS1D02G265900.1/PB.50525.2/TraesCS1A02G265900.1/TraesCS1B02G276900.1/TraesCS1D02G265800.1/PB.3363.2/TraesCS1B02G034300.1/PB.56…
MF: unfolded protein binding (GO:0051082)	89	0.567055	3.07315	1e-10	1.15429e-08	1.05263e-08	3243	PB.30583.2/PB.4802.3/TraesCS2A02G033700.1/TraesCS2B02G047400.1/PB.1341.6/TraesCS7A02G242200.1/PB.35344.4/PB.3685.2/TraesCS5D02G434100.1/TraesCS1D02G403500.1/TraesCS1B02G423600.1/TraesCS7B02G149200.1/TraesCS3B02G130400.1/TraesCS1A02G395300.1/PB.13441.4/PB.13441.1/TraesCS3B02G131000.1/PB.3685.3/TraesCS5D02G258900.2/PB.45477.4/PB.13441.3/TraesCS5B02G428000.1/TraesCS3D02G115100.1/PB.13441.2/TraesCS3B…
BP: response to temperature stimulus (GO:0009266)	73	0.522685	2.72321	2.1266e-10	2.14786e-08	1.95871e-08	2385	TraesCS7D02G179000.1/TraesCS7D02G179600.1/TraesCS3A02G112900.1/TraesCS7B02G083100.1/TraesCS7B02G083500.1/TraesCS7D02G179100.1/TraesCS4D02G086200.1/TraesCS3D02G114800.1/TraesCS3A02G113000.1/TraesCS3D02G115000.1/TraesCS7A02G177700.1/TraesCS7B02G109100.1/TraesCS2B02G329900.1/TraesCS7A02G232500.1/TraesCS7D02G232600.1/TraesCS7A02G202200.1/TraesCS3A02G113100.1/PB.4738.1/TraesCS3D02G115400.1/TraesCS7B02…
BP: protein complex oligomerization (GO:0051259)	26	0.668416	2.6445	6.37988e-08	5.72771e-06	5.22329e-06	2005	TraesCS4A02G092800.1/TraesCS4D02G212300.1/TraesCS4D02G213300.1/TraesCS4A02G092900.1/TraesCS4B02G212300.1/TraesCS3B02G130400.1/TraesCSU02G194600.1/TraesCS4D02G213100.1/TraesCS3B02G131000.1/TraesCS3D02G045600.1/TraesCS4A02G092700.1/TraesCS3D02G115100.1/TraesCS3B02G130300.1/TraesCS3B02G130900.1/TraesCS3D02G114900.1/TraesCSU02G175200.1/TraesCS3D02G046800.1/TraesCS3D02G115200.1/TraesCS3B02G049900.1
BP: protein-containing complex assembly (GO:0065003)	25	0.651984	2.55152	5.40118e-07	4.36415e-05	3.97982e-05	1528	TraesCS7A02G301100.1/TraesCS4A02G092800.1/TraesCS4D02G212300.1/TraesCS4D02G213300.1/TraesCS4A02G092900.1/TraesCS4B02G212300.1/TraesCS2B02G404400.1/TraesCSU02G194600.1/TraesCS4D02G213100.1/TraesCS3D02G045600.1/TraesCS4A02G092700.1/TraesCS2A02G386800.1/TraesCSU02G175200.1/TraesCS2D02G383600.1/TraesCS2A02G080400.1
BP: response to stress (GO:0006950)	173	0.343475	2.08024	1.60821e-06	0.00011813	0.000107727	3330	PB.47320.3/TraesCS7A02G301100.1/TraesCS7D02G179000.1/TraesCS7D02G179600.1/TraesCS3A02G112900.1/TraesCS7B02G083100.1/TraesCS7B02G083500.1/PB.30583.2/TraesCS7D02G179100.1/TraesCS4D02G086200.1/TraesCS3D02G114800.1/TraesCS3A02G113000.1/TraesCS3D02G115000.1/TraesCS7A02G177700.1/TraesCS1B02G373100.1/PB.42790.3/TraesCS7B02G109100.1/TraesCS2B02G329900.1/TraesCS7A02G232500.1/TraesCS7D02G232600.1/TraesCS2A…
BP: protein homooligomerization (GO:0051260)	22	0.652833	2.48795	1.97115e-06	0.000132724	0.000121035	2334	TraesCS4A02G092800.1/TraesCS4D02G212300.1/TraesCS4D02G213300.1/TraesCS4A02G092900.1/TraesCS4B02G212300.1/PB.50815.1/TraesCSU02G194600.1/TraesCS4D02G213100.1/TraesCS3D02G045600.1/PB.21241.2/TraesCS4A02G092700.1/TraesCSU02G175200.1/PB.18674.2/PB.21240.2/PB.18674.1/PB.21241.10
BP: protein-containing complex subunit organization (GO:0043933)	28	0.601189	2.44079	2.67497e-06	0.00016626	0.000151618	1528	TraesCS7A02G301100.1/TraesCS4A02G092800.1/TraesCS4D02G212300.1/TraesCS4D02G213300.1/TraesCS4A02G092900.1/TraesCS4B02G212300.1/TraesCS2B02G404400.1/TraesCSU02G194600.1/TraesCS4D02G213100.1/TraesCS3D02G045600.1/TraesCS4A02G092700.1/TraesCS2A02G386800.1/TraesCSU02G175200.1/TraesCS2D02G383600.1/TraesCS2A02G080400.1
BP: negative regulation of endopeptidase activity (GO:0010951)	40	-0.506267	-2.53218	2.99111e-06	0.00017263	0.000157427	3033	PB.17431.2/PB.5623.5/PB.3364.4/PB.5626.2/PB.20118.1/PB.76.3/PB.34286.4/PB.5625.1/PB.76.1/PB.16086.1/PB.40104.3/PB.36723.1/PB.3362.4/PB.5623.2/PB.50525.2/PB.3363.2/PB.5624.1/PB.5626.1/PB.5623.4/PB.2923.1/PB.3364.5/PB.21210.2/PB.1093.1/PB.3364.1
MF: chaperone binding (GO:0051087)	43	0.521026	2.39337	3.34747e-06	0.000180317	0.000164437	3928	PB.38043.1/TraesCS6D02G393700.1/TraesCS5D02G319300.3/TraesCS7B02G064000.1/PB.45477.4/TraesCS7B02G388700.1/PB.34870.2/TraesCS2B02G485500.1/PB.42221.2/TraesCS7A02G159600.1/TraesCS6A02G109000.1/TraesCS7B02G388700.2/TraesCS7D02G282500.1/TraesCS7B02G064100.1/TraesCS7B02G388700.4/TraesCS6B02G456700.1/TraesCS6D02G203300.1/TraesCS6B02G456600.1/TraesCS4D02G357900.6/PB.30917.2/PB.24746.1/TraesCS7D02G050300…
BP: response to abiotic stimulus (GO:0009628)	102	0.392506	2.17286	3.74102e-06	0.000188921	0.000172284	3184	TraesCS7D02G179000.1/TraesCS7D02G179600.1/TraesCS3A02G112900.1/TraesCS7B02G083100.1/TraesCS7B02G083500.1/TraesCS7D02G179100.1/TraesCS4D02G086200.1/TraesCS3D02G114800.1/TraesCS3A02G113000.1/TraesCS3D02G115000.1/TraesCS7A02G177700.1/TraesCS7B02G109100.1/TraesCS2B02G329900.1/TraesCS7A02G232500.1/TraesCS7D02G232600.1/TraesCS7A02G202200.1/TraesCS3A02G113100.1/TraesCS3D02G115400.1/TraesCS7B02G347100.1/…
BP: response to high light intensity (GO:0009644)	36	0.5433	2.38879	5.01582e-06	0.000238399	0.000217404	3906	PB.48077.1/PB.26131.1/PB.23138.5/PB.38054.2/PB.46478.1/PB.25519.5/PB.45039.1/TraesCS6A02G181700.1/TraesCS6D02G169100.1/TraesCS6B02G210600.1/PB.22685.4/PB.23812.1/PB.28585.1/PB.26549.1/PB.20516.1/PB.28699.2/TraesCS3B02G413700.1/PB.23856.2/PB.48746.5/TraesCS4A02G068300.1/PB.25519.2/PB.28657.2/PB.48746.2/TraesCS4A02G068200.1/TraesCS3A02G381000.1/PB.25519.3
BP: response to reactive oxygen species (GO:0000302)	24	0.600177	2.34012	1.18228e-05	0.000530712	0.000483974	2005	TraesCS7B02G109100.1/TraesCS3B02G130400.1/TraesCS7A02G202200.1/TraesCS3B02G131000.1/PB.4738.1/TraesCS3D02G115100.1/TraesCS3B02G130300.1/TraesCS3B02G130900.1/TraesCS3D02G114900.1/TraesCS6A02G181700.1/TraesCS3D02G046800.1/TraesCS3D02G115200.1/TraesCS6D02G169100.1/TraesCS6B02G210600.1/TraesCS3B02G049900.1
BP: response to cadmium ion (GO:0046686)	35	0.526953	2.28914	2.12297e-05	0.000902819	0.000823311	2205	TraesCS7D02G179000.1/TraesCS7D02G179600.1/TraesCS7A02G349100.1/TraesCS7B02G083100.1/TraesCS7B02G083500.1/TraesCS7D02G179100.1/TraesCS7A02G177700.1/TraesCS7A02G232500.1/TraesCS7D02G232600.1/PB.27664.3/PB.4738.1/PB.25513.1/TraesCS7A02G177500.1/TraesCS6A02G316200.1/TraesCS7D02G179400.1/TraesCS7A02G177600.1/TraesCS6D02G295500.1
MF: protein self-association (GO:0043621)	22	0.604951	2.30547	3.34788e-05	0.00135254	0.00123343	3692	TraesCS1A02G164000.1/TraesCS6B02G354400.1/TraesCS6A02G323800.1/TraesCS3B02G130400.1/TraesCS3B02G131000.1/TraesCS3D02G115100.1/TraesCS3B02G130300.1/TraesCS3B02G130900.1/TraesCS3D02G114900.1/TraesCS3D02G046800.1/TraesCS3D02G115200.1/TraesCS3B02G049900.1/TraesCS4D02G226000.1/TraesCS3D02G046700.1/PB.25863.2/TraesCS4A02G068300.1/TraesCS4B02G225400.1/TraesCS4A02G068200.1
BP: response to wounding (GO:0009611)	56	-0.402554	-2.17828	3.61113e-05	0.00138943	0.00126706	3033	PB.17431.2/PB.5623.5/TraesCS3D02G246800.1/TraesCS3A02G093900.1/PB.3364.4/TraesCS2D02G507200.1/PB.5626.2/TraesCS3A02G506500.1/TraesCS2D02G165800.1/PB.31077.1/PB.20118.1/PB.76.3/PB.5625.1/PB.76.1/PB.40104.3/PB.3362.4/PB.5623.2/PB.50525.2/PB.3363.2/TraesCS1B02G034300.1/PB.5624.1/TraesCS1B02G034400.1/PB.5626.1/TraesCS1B02G034200.1/PB.5623.4/TraesCS2D02G501800.1/PB.3364.5/PB.1093.1/TraesCS1B02G035000.…
BP: CC assembly (GO:0022607)	39	0.491975	2.21125	4.97472e-05	0.00182708	0.00166617	1869	TraesCS7A02G301100.1/TraesCS4A02G092800.1/TraesCS4D02G212300.1/TraesCS4D02G213300.1/TraesCS4A02G092900.1/TraesCS4B02G212300.1/TraesCS2B02G404400.1/TraesCSU02G194600.1/TraesCS4D02G213100.1/TraesCS3D02G045600.1/TraesCS4A02G092700.1/TraesCS2A02G386800.1/TraesCSU02G175200.1/TraesCS2D02G383600.1/TraesCS2A02G080400.1/TraesCS5B02G539500.3/TraesCS3A02G516700.1
MF: toxin activity (GO:0090729)	10	-0.754543	-2.33664	5.45893e-05	0.00191775	0.00174886	1548	TraesCSU02G183200.1/TraesCS3B02G604900.1/TraesCS5A02G474900.1/TraesCSU02G183400.1/TraesCS5B02G488800.1/TraesCS5A02G475500.2/TraesCS5A02G475500.1
MF: transmembrane transporter activity (GO:0022857)	86	-0.337738	-1.99179	5.93729e-05	0.00199889	0.00182285	3957	TraesCS7A02G300400.1/TraesCS2B02G626000.1/TraesCS3B02G166500.1/TraesCS2B02G232900.1/TraesCS3D02G188100.2/TraesCS4A02G464100.1/TraesCS7D02G016700.1/TraesCSU02G191400.2/TraesCS5A02G189500.1/TraesCS4A02G278800.1/TraesCS4A02G066200.1/TraesCS5B02G193700.1/TraesCS7D02G297000.1/TraesCS7A02G301700.1/TraesCS6A02G008700.1/TraesCS1A02G204300.1/TraesCS7A02G516600.1/TraesCS4A02G386700.1/TraesCS1B02G267300.1/T…
BP: starch biosynthetic process (GO:0019252)	45	-0.427144	-2.20855	6.60079e-05	0.00213338	0.0019455	1870	PB.6607.2/PB.6607.4/PB.6607.8/PB.2093.7/TraesCS4D02G026700.1/PB.46537.1/PB.46943.2/PB.45539.1/TraesCS1D02G427400.2/TraesCS5B02G484700.1/PB.9823.2/PB.46538.4/PB.2093.9/PB.2093.11/PB.1722.3/PB.4428.6/PB.34583.2/PB.19684.2/PB.2093.12/PB.46538.6/PB.17062.2/PB.13194.2/PB.46538.5/PB.33950.4/PB.46538.3/PB.13194.1
BP: negative regulation of translation (GO:0017148)	28	-0.513985	-2.2924	8.11193e-05	0.00252094	0.00229893	1099	TraesCSU02G183200.1/TraesCS3B02G604900.1/PB.45160.1/TraesCS5A02G474900.1/PB.775.2/TraesCSU02G183400.1/TraesCS5B02G488800.1/PB.32819.2/TraesCS5A02G475500.2/PB.24491.3/TraesCS5A02G475500.1/PB.32820.1
MF: nutrient reservoir activity (GO:0045735)	136	0.323016	1.89019	0.000125122	0.0037444	0.00341464	1478	PB.38909.124/PB.50771.1/PB.40078.1/PB.38909.141/PB.38909.41/TraesCS7A02G035200.1/TraesCSU02G265913.1/PB.50849.1/TraesCS6B02G066001.1/PB.50460.55/TraesCS7A02G035300.1/TraesCSU02G149938.1/PB.50460.4/PB.38909.145/PB.38909.173/TraesCS6B02G066000.1/PB.50460.42/PB.38909.179/PB.38909.72/TraesCS1B02G059000.1/PB.40077.2/TraesCS1D02G001000.1/PB.5576.12/PB.50460.20/PB.38909.135/PB.44262.1/PB.50851.3/PB.3890…
MF: beta-glucosidase activity (GO:0008422)	14	-0.650491	-2.26333	0.000134703	0.00388715	0.00354482	2395	TraesCS3B02G484000.1/TraesCS2D02G381100.1/PB.12992.3/TraesCS2D02G136500.1/PB.13538.2/PB.18398.1/PB.13538.1/TraesCS2D02G381000.1/PB.12992.1/PB.31085.2
BP: carbohydrate metabolic process (GO:0005975)	144	-0.270756	-1.77778	0.000183494	0.00511252	0.00466228	2622	TraesCS2A02G058100.1/TraesCS4A02G017300.2/PB.27820.2/TraesCS2A02G134300.1/TraesCS3A02G386300.1/PB.5237.2/PB.8248.3/TraesCS7B02G202400.1/TraesCS3B02G484000.1/TraesCS3B02G530500.1/TraesCS6D02G305000.1/TraesCS2D02G381100.1/TraesCS4B02G356800.1/PB.12992.3/TraesCS6B02G246800.1/TraesCS5D02G470100.1/TraesCS3B02G229400.1/TraesCS3A02G044800.1/TraesCS3D02G359200.1/PB.4704.1/TraesCS2D02G136500.1/TraesCS5B02…
BP: nucleosome assembly (GO:0006334)	70	-0.337725	-1.88802	0.000336742	0.00906959	0.00827086	5066	PB.7431.2/TraesCS6B02G078600.1/TraesCS1B02G097900.1/TraesCS1A02G287800.1/TraesCS6A02G055400.1/TraesCS2B02G492400.1/TraesCS6A02G055200.1/TraesCS2A02G397400.1/PB.46422.1/TraesCS1A02G363000.1/TraesCS6A02G062800.1/TraesCS1A02G262000.1/TraesCS2B02G415700.2/PB.40063.1/TraesCS1D02G364400.1/TraesCS1A02G360100.1/TraesCS4A02G423600.1/TraesCSU02G121200.1/TraesCS6B02G084100.1/TraesCS1D02G286600.1/TraesCS5D02…
BP: cell division (GO:0051301)	34	-0.451831	-2.18629	0.000380727	0.00992347	0.00904955	3483	PB.44604.2/TraesCS2D02G527300.1/TraesCS3D02G282900.1/PB.11259.11/PB.16433.2/TraesCS2B02G256100.1/PB.12893.1/PB.1925.3/TraesCS5D02G117000.1/PB.14617.4/PB.14695.1/PB.4490.1/PB.16433.3/PB.492.1/PB.9857.1/PB.16433.6/PB.16433.5
MF: rRNA N-glycosylase activity (GO:0030598)	20	-0.534326	-2.15234	0.000576949	0.014568	0.013285	1548	TraesCSU02G183200.1/TraesCS3B02G604900.1/PB.45160.1/TraesCS5A02G474900.1/TraesCSU02G183400.1/TraesCS5B02G488800.1/PB.32819.2/TraesCS5A02G475500.2/TraesCS5A02G475500.1/PB.32820.1
BP: CC organization (GO:0016043)	83	0.356237	1.8912	0.000614106	0.0150363	0.0137121	2168	TraesCS7A02G301100.1/TraesCS4A02G092800.1/TraesCS1A02G164000.1/TraesCS5B02G352900.1/TraesCS4D02G212300.1/TraesCS4D02G213300.1/TraesCS4A02G092900.1/TraesCS4B02G212300.1/TraesCS2A02G156800.2/TraesCS2B02G404400.1/TraesCSU02G194600.1/TraesCS4D02G213100.1/TraesCS3D02G045600.1/PB.21623.1/TraesCS4A02G092700.1/TraesCS2A02G386800.1/TraesCS2D02G162600.1/TraesCSU02G175200.1/TraesCS2D02G383600.1/TraesCS2A02G…
MF: actin filament binding (GO:0051015)	10	-0.691623	-2.14179	0.000660927	0.0153285	0.0139786	1828	PB.4704.1/TraesCS5B02G064000.1/TraesCS1B02G043200.1/TraesCS1D02G101900.1/TraesCS1D02G009100.1/TraesCS1B02G016400.1/TraesCS1A02G010200.1
MF: Hsp90 protein binding (GO:0051879)	14	0.62539	2.01115	0.000663984	0.0153285	0.0139786	3987	TraesCS2B02G404400.1/PB.7616.3/TraesCS2A02G386800.1/TraesCS2D02G383600.1/TraesCS6A02G109000.1/TraesCS7D02G282500.1/PB.41666.1/TraesCS2B02G433400.1/PB.12999.2/TraesCS7B02G200400.1/PB.37462.4/PB.37462.2
BP: CC biogenesis (GO:0044085)	47	0.420904	1.99269	0.000857221	0.0189578	0.0172882	1869	TraesCS7A02G301100.1/TraesCS4A02G092800.1/TraesCS4D02G212300.1/TraesCS4D02G213300.1/TraesCS4A02G092900.1/TraesCS4B02G212300.1/TraesCS2B02G404400.1/TraesCSU02G194600.1/TraesCS4D02G213100.1/TraesCS3D02G045600.1/TraesCS4A02G092700.1/TraesCS2A02G386800.1/TraesCSU02G175200.1/TraesCS2D02G383600.1/TraesCS2A02G080400.1/TraesCS5B02G539500.3/TraesCS3A02G516700.1
BP: glutamine metabolic process (GO:0006541)	20	-0.520767	-2.09772	0.000868117	0.0189578	0.0172882	4196	TraesCS2D02G468300.1/PB.14863.3/TraesCS4D02G195100.1/TraesCS3B02G059500.1/PB.31965.1/TraesCS3D02G050100.1/PB.31965.2/TraesCS3B02G263100.1/TraesCS3A02G077100.1/TraesCS1A02G411600.1/PB.20086.1/TraesCS5D02G159100.1/PB.29412.2/TraesCS3B02G059300.1/TraesCS4A02G109900.1
CC: extracellular region (GO:0005576)	162	-0.240956	-1.59461	0.000965292	0.0205252	0.0187176	2560	PB.5237.2/TraesCS2D02G108500.1/TraesCS1D02G270100.1/TraesCS2D02G107300.1/PB.4387.6/PB.5626.2/TraesCS3B02G034300.1/TraesCS5A02G017900.1/PB.76.3/TraesCS7B02G159300.1/TraesCS2A02G574400.1/TraesCS5D02G470100.1/TraesCS3D02G034100.1/PB.76.1/PB.16086.1/TraesCS7A02G070900.1/TraesCS3D02G031800.1/TraesCS4B02G030000.1/PB.36723.1/PB.25225.1/PB.3362.4/TraesCS1B02G276800.1/TraesCS1D02G266000.1/TraesCSU02G11350…
BP: polysaccharide catabolic process (GO:0000272)	16	-0.57697	-2.09671	0.00108091	0.0217941	0.0198748	2022	TraesCS6B02G116400.2/PB.30315.34/PB.30315.47/PB.27028.15/TraesCS4D02G339400.1/TraesCS2B02G240100.2/TraesCS5A02G513200.1/PB.27028.22/PB.27028.17/PB.27028.14/PB.27028.13/TraesCS4B02G393500.1
MF: beta-amylase activity (GO:0016161)	16	-0.57697	-2.09671	0.00108091	0.0217941	0.0198748	2022	TraesCS6B02G116400.2/PB.30315.34/PB.30315.47/PB.27028.15/TraesCS4D02G339400.1/TraesCS2B02G240100.2/TraesCS5A02G513200.1/PB.27028.22/PB.27028.17/PB.27028.14/PB.27028.13/TraesCS4B02G393500.1
BP: glycosyl compound metabolic process (GO:1901657)	14	-0.598197	-2.08137	0.00110589	0.0217941	0.0198748	3031	PB.18987.1/PB.36366.2/PB.13538.3/TraesCS7A02G446600.1/TraesCS4B02G149200.1/PB.8248.3/PB.12992.3/PB.13538.2/PB.18398.1/PB.13538.1/PB.13635.3/PB.12992.1/PB.31085.2
BP: response to metal ion (GO:0010038)	35	0.446948	1.94159	0.00148572	0.0285823	0.0260652	3331	TraesCS7D02G179000.1/TraesCS7D02G179600.1/TraesCS7A02G349100.1/TraesCS7B02G083100.1/TraesCS7B02G083500.1/TraesCS7D02G179100.1/TraesCS7A02G177700.1/TraesCS7A02G232500.1/TraesCS7D02G232600.1/TraesCS7A02G177500.1/TraesCS6A02G316200.1/TraesCS7D02G179400.1/TraesCS7A02G177600.1/TraesCS6D02G295500.1/TraesCS7B02G095300.6/TraesCS4B02G200000.1/TraesCS7D02G179200.1/TraesCS2A02G480200.1
BP: CC organization or biogenesis (GO:0071840)	87	0.325433	1.75823	0.00190946	0.03588	0.0327202	4165	TraesCS7A02G301100.1/TraesCS4A02G092800.1/TraesCS1A02G164000.1/TraesCS5B02G352900.1/TraesCS4D02G212300.1/TraesCS4D02G213300.1/TraesCS4A02G092900.1/TraesCS4B02G212300.1/TraesCS2A02G156800.2/TraesCS2B02G404400.1/TraesCSU02G194600.1/TraesCS4D02G213100.1/TraesCS3D02G045600.1/TraesCS4A02G092700.1/TraesCS2A02G386800.1/TraesCS2D02G162600.1/TraesCSU02G175200.1/TraesCS2D02G383600.1/TraesCS2A02G080400.1/Tr…
BP: maltose metabolic process (GO:0000023)	12	-0.617638	-2.02012	0.00232941	0.0427765	0.0390093	2644	PB.46943.2/PB.43464.6/PB.43464.3/PB.9823.2/PB.34583.2/PB.46889.6/PB.19684.2/PB.17062.2
CC: stromule (GO:0010319)	11	-0.624864	-2.00289	0.00242811	0.0435981	0.0397585	804	PB.40415.2/PB.19684.2/PB.263.1/PB.34366.3/PB.17062.2/PB.34366.1
MF: lipid binding (GO:0008289)	79	0.332458	1.75546	0.00274221	0.0481676	0.0439256	3880	PB.45844.1/TraesCSU02G057100.1/TraesCS3B02G063500.1/TraesCS3B02G062700.1/TraesCS1A02G048700.1/TraesCSU02G147100.1/PB.50768.1/TraesCSU02G147200.1/TraesCS5A02G452600.1/PB.30738.1/TraesCS2A02G501300.1/TraesCS3D02G296500.2/TraesCS3B02G063700.1/TraesCSU02G056900.1/TraesCS3B02G063200.1/TraesCSU02G057300.1/TraesCS3B02G063000.1/TraesCS2D02G398600.1/TraesCS2B02G141800.1/TraesCS3A02G053000.1/TraesCS1D02G19…
NES: normalized enrichment score
