# Supplementary material for: The Landscapes of Gluten Regulatory Network in Elite Wheat Cultivars Contrasting in Gluten Strength
Source: Int J Mol Sci. 2023 May 29;24(11):9447. doi: 10.3390/ijms24119447 (PMC10253585; doi:10.3390/ijms24119447)
Supplement: Supplementary file 1 [file ijms-24-09447-s001.zip › Table S11-S15.xlsx]

## Sheet: Table S11
Supplementary Table S11: Gene list of WGCNA brown module
ID	module	lncRNA	lncRNA targets	DAS
PB.17361.3	brown	YES	TraesCS4D02G031300
PB.8122.1	brown	YES	PB.8123;TraesCS2A02G079300;TraesCS2A02G079400;TraesCS2A02G079500;TraesCS2A02G079600;TraesCS2A02G079700;TraesCS2A02G079800;TraesCS2A02G079900;TraesCS2A02G080000;TraesCS2A02G080100;TraesCS2A02G080200;TraesCS4B02G270600;TraesCS5D02G317600
PB.36021.1	brown	YES	PB.34715;PB.34716;PB.34717;TraesCS2A02G484400;TraesCS5D02G162800;TraesCS5D02G162900;TraesCS5D02G163000;TraesCS5D02G163100
PB.34298.1	brown
PB.4844.1	brown			Z168N vs. Y13N
PB.5245.2	brown
PB.6788.1	brown
PB.921.2	brown
TraesCS1B02G204600.1	brown
TraesCS2D02G469400.1	brown
TraesCS2D02G600900.1	brown
TraesCS3B02G154700.1	brown
TraesCS3B02G244200.1	brown
TraesCS3B02G265300.1	brown
TraesCS3B02G374100.2	brown
TraesCS4D02G147200.1	brown
TraesCS4D02G239700.1	brown
TraesCS5A02G061300.1	brown
TraesCS5B02G072600.1	brown
TraesCS7B02G033300.2	brown
TraesCS7D02G299600.1	brown
PB.12167.1	brown
PB.13646.1	brown
PB.15956.1	brown
PB.17421.1	brown
PB.18303.1	brown
PB.24011.1	brown
PB.24650.1	brown
PB.25519.4	brown			Z168N vs. Y13N
PB.26943.1	brown
PB.32309.6	brown			Z168N vs. Y13N
PB.37945.4	brown
PB.41235.1	brown
PB.4185.1	brown
PB.42131.1	brown
PB.42528.1	brown
PB.42557.1	brown
PB.47035.1	brown
PB.47081.1	brown
PB.48067.3	brown
PB.49391.1	brown
PB.50802.3	brown
PB.5383.1	brown
PB.604.2	brown
PB.9746.1	brown
TraesCS1A02G054900.2	brown
TraesCS1A02G282900.1	brown
TraesCS1A02G319100.1	brown
TraesCS1B02G169400.4	brown
TraesCS1D02G136800.7	brown
TraesCS1D02G157513.1	brown
TraesCS1D02G322600.1	brown
TraesCS1D02G335400.1	brown
TraesCS2A02G211100.1	brown
TraesCS2A02G227100.2	brown
TraesCS2A02G332100.1	brown
TraesCS2B02G401400.1	brown
TraesCS2D02G378800.1	brown
TraesCS3A02G438800.1	brown
TraesCS3D02G125000.1	brown
TraesCS3D02G295200.1	brown
TraesCS4A02G128300.1	brown
TraesCS4A02G356200.1	brown
TraesCS4B02G205800.1	brown
TraesCS4D02G291700.2	brown
TraesCS4D02G364900.1	brown
TraesCS5A02G063300.2	brown
TraesCS5A02G339600.1	brown
TraesCS5D02G338700.1	brown
TraesCS5D02G479700.1	brown
TraesCS6A02G115300.1	brown
TraesCS6B02G249700.1	brown
TraesCS7A02G253300.1	brown
TraesCS7B02G294500.2	brown
TraesCS7B02G412300.1	brown
TraesCS7B02G419800.1	brown
TraesCS7D02G010300.1	brown
TraesCS7D02G326400.2	brown
PB.10693.5	brown
PB.31665.1	brown
PB.36006.1	brown
PB.40514.9	brown
PB.43260.6	brown
PB.47095.1	brown
TraesCS1B02G204800.1	brown
TraesCS1B02G301400.1	brown
TraesCS1D02G123300.2	brown
TraesCS2B02G618700.1	brown
TraesCS2D02G032200.2	brown
TraesCS3A02G385400.1	brown
TraesCS3A02G432800.1	brown
TraesCS3B02G326500.1	brown
TraesCS4A02G286000.3	brown
TraesCS4B02G137400.1	brown
TraesCS4B02G174700.1	brown
TraesCS4B02G195500.1	brown
TraesCS4D02G334400.1	brown
TraesCS5D02G143700.1	brown
TraesCS6B02G193500.2	brown
TraesCS6B02G246800.1	brown
TraesCS6B02G363700.1	brown
TraesCS6D02G145300.1	brown
TraesCS6D02G213500.3	brown
TraesCS6D02G352700.1	brown
TraesCS7A02G247800.1	brown
TraesCS7B02G118900.1	brown
TraesCS7D02G310900.1	brown
TraesCS7D02G377100.1	brown
TraesCS7D02G380300.1	brown
TraesCS7D02G399600.1	brown
PB.10601.4	brown
PB.20433.1	brown
PB.2103.1	brown
PB.26059.1	brown			Z168N vs. Y13N
PB.26381.1	brown
PB.27983.2	brown
PB.29553.1	brown
PB.34050.2	brown
PB.35084.1	brown
PB.35504.2	brown
PB.36837.4	brown			Z168N vs. Y13N
PB.38077.1	brown
PB.40854.2	brown
PB.42348.2	brown
PB.4434.1	brown
PB.46026.1	brown
PB.46586.1	brown			Z168N vs. Y13N
PB.46622.1	brown
PB.48091.1	brown
PB.4987.2	brown
PB.7231.2	brown
PB.9517.4	brown
TraesCS1A02G038800.1	brown
TraesCS1B02G168200.1	brown
TraesCS1B02G283100.1	brown
TraesCS1B02G435000.1	brown
TraesCS2A02G473800.1	brown
TraesCS2B02G094500.1	brown
TraesCS2D02G323000.1	brown
TraesCS2D02G385600.1	brown
TraesCS2D02G453700.1	brown
TraesCS3D02G033100.1	brown
TraesCS3D02G140200.4	brown
TraesCS3D02G474500.1	brown
TraesCS4A02G110700.1	brown
TraesCS5B02G137900.1	brown
TraesCS5D02G260500.1	brown
TraesCS5D02G373100.1	brown
TraesCS6B02G396800.1	brown
TraesCS7A02G251800.1	brown
TraesCS7B02G239200.2	brown
PB.10028.1	brown
PB.14052.6	brown			Z168N vs. Y13N
PB.21735.1	brown
PB.2767.1	brown
PB.28462.3	brown
PB.31041.1	brown
PB.31777.1	brown
PB.32703.3	brown
PB.32943.3	brown
PB.38651.1	brown
PB.43563.1	brown
PB.43968.1	brown
PB.45982.4	brown			Z168N vs. Y13N
PB.4915.3	brown			Z168N vs. Y13N
PB.50560.1	brown
PB.8156.1	brown
TraesCS1A02G050300.1	brown
TraesCS1A02G283600.1	brown
TraesCS1D02G013100.3	brown
TraesCS1D02G061500.2	brown
TraesCS1D02G165100.4	brown
TraesCS1D02G350800.1	brown
TraesCS2D02G463700.1	brown
TraesCS3A02G000400.1	brown
TraesCS3A02G062800.1	brown
TraesCS3A02G079900.2	brown
TraesCS3A02G276400.2	brown
TraesCS3A02G375200.3	brown
TraesCS3A02G442100.1	brown
TraesCS3B02G150100.1	brown
TraesCS3B02G166500.1	brown
TraesCS3B02G224500.1	brown
TraesCS3B02G578900.1	brown
TraesCS4A02G200300.1	brown
TraesCS4D02G032900.1	brown
TraesCS4D02G210800.1	brown
TraesCS5A02G016200.1	brown
TraesCS5A02G141500.1	brown
TraesCS5D02G343900.1	brown
TraesCS5D02G346200.2	brown
TraesCS5D02G367300.1	brown
TraesCS6A02G099900.1	brown
TraesCS6A02G334700.1	brown
TraesCS6A02G411000.2	brown
TraesCS6B02G355400.1	brown
TraesCS6D02G013500.1	brown
TraesCS7A02G270800.2	brown
TraesCS7A02G458000.2	brown
TraesCS7A02G512400.1	brown
TraesCSU02G169500.1	brown
PB.10670.3	brown
PB.11732.1	brown
PB.13547.1	brown
PB.14049.1	brown
PB.1503.1	brown
PB.16102.1	brown
PB.21118.1	brown
PB.2300.1	brown
PB.24005.1	brown
PB.24746.1	brown
PB.25363.1	brown
PB.2925.2	brown
PB.29751.5	brown			Z168N vs. Y13N
PB.31121.1	brown
PB.34862.1	brown
PB.36406.2	brown
PB.3685.2	brown
PB.37888.1	brown
PB.38909.118	brown
PB.39125.1	brown
PB.40882.4	brown
PB.43534.1	brown
PB.45097.1	brown
PB.45384.2	brown
PB.45798.2	brown
PB.4583.3	brown
PB.48876.1	brown
PB.49804.2	brown
PB.49862.1	brown
PB.50569.1	brown
PB.5168.1	brown
PB.5589.21	brown
PB.6462.1	brown
PB.8214.2	brown
TraesCS1D02G085000.1	brown
TraesCS2A02G505800.2	brown
TraesCS2B02G049000.1	brown
TraesCS2B02G217200.1	brown
TraesCS2B02G367100.1	brown
TraesCS2B02G401300.1	brown
TraesCS2B02G583300.4	brown
TraesCS3A02G118000.1	brown
TraesCS3A02G237700.3	brown
TraesCS3A02G410400.1	brown
TraesCS3B02G288900.2	brown
TraesCS3B02G506100.1	brown
TraesCS3D02G324500.1	brown
TraesCS4A02G067500.1	brown
TraesCS4D02G276500.1	brown
TraesCS5B02G066700.1	brown			Z168N vs. Y13N
TraesCS5B02G109500.3	brown
TraesCS5D02G186700.1	brown
TraesCS6A02G024000.1	brown
TraesCS6A02G123300.1	brown
TraesCS6B02G155800.1	brown
TraesCS6B02G360900.1	brown
TraesCS6B02G456600.1	brown
TraesCS7A02G161000.1	brown
TraesCS7A02G177600.1	brown
TraesCS7A02G272700.1	brown
TraesCS7A02G419800.1	brown
TraesCS7B02G185100.1	brown
TraesCS7B02G388700.2	brown
TraesCS7B02G472400.1	brown
TraesCS7D02G078500.1	brown
TraesCS7D02G190000.1	brown
PB.1001.1	brown
PB.15344.2	brown
PB.1623.1	brown
PB.16303.1	brown
PB.17504.3	brown
PB.19180.2	brown
PB.22611.5	brown			Z168N vs. Y13N
PB.22917.1	brown
PB.28372.4	brown			Z168N vs. Y13N
PB.29435.5	brown
PB.30490.1	brown
PB.31710.1	brown
PB.33429.1	brown
PB.42161.1	brown
PB.45286.2	brown
PB.47661.1	brown
PB.48798.1	brown
PB.49884.1	brown
PB.6318.1	brown
PB.6607.1	brown
PB.7292.2	brown
PB.8310.2	brown			Z168N vs. Y13N
TraesCS1D02G038700.2	brown
TraesCS2B02G210000.1	brown
TraesCS2D02G304000.3	brown
TraesCS2D02G391700.1	brown
TraesCS3D02G060100.1	brown
TraesCS3D02G198900.1	brown
TraesCS3D02G362300.3	brown
TraesCS4A02G017700.1	brown
TraesCS4A02G204500.1	brown
TraesCS4A02G381200.1	brown
TraesCS4B02G083100.1	brown
TraesCS4B02G141300.1	brown
TraesCS4D02G091500.1	brown
TraesCS5A02G106400.5	brown
TraesCS5B02G044300.1	brown
TraesCS5B02G067100.1	brown
TraesCS5B02G159900.1	brown
TraesCS5B02G235500.1	brown
TraesCS5B02G505500.2	brown
TraesCS5D02G121700.1	brown
TraesCS6A02G283500.1	brown
TraesCS7A02G184100.1	brown
TraesCS7A02G549300.1	brown
TraesCS7B02G373800.1	brown
TraesCS7B02G380300.1	brown
PB.14907.1	brown
PB.15761.2	brown
PB.15855.1	brown
PB.18516.1	brown
PB.2037.4	brown
PB.21814.5	brown
PB.22121.5	brown			Z168N vs. Y13N
PB.23675.1	brown
PB.23871.1	brown
PB.24560.2	brown			Z168N vs. Y13N
PB.31149.1	brown
PB.31341.1	brown
PB.32766.1	brown
PB.33645.2	brown
PB.34448.1	brown
PB.35028.3	brown
PB.3730.1	brown
PB.37331.1	brown
PB.38026.1	brown
PB.38854.1	brown
PB.38909.124	brown
PB.38909.72	brown
PB.39055.1	brown
PB.40050.1	brown
PB.40578.2	brown
PB.41446.5	brown			Z168N vs. Y13N
PB.42380.5	brown
PB.42721.1	brown
PB.44402.1	brown
PB.46054.1	brown
PB.47320.3	brown
PB.48231.1	brown
PB.49430.1	brown
PB.49559.7	brown
PB.50165.1	brown
PB.50491.1	brown
PB.5608.1	brown
PB.6403.1	brown
PB.6979.1	brown
PB.7291.2	brown
PB.755.1	brown
PB.7616.3	brown
PB.8950.2	brown
TraesCS1A02G071600.1	brown
TraesCS1A02G101000.2	brown
TraesCS1B02G070700.1	brown
TraesCS1D02G019900.1	brown
TraesCS2A02G014000.1	brown
TraesCS2B02G079300.1	brown
TraesCS3A02G031400.1	brown
TraesCS3A02G274500.1	brown
TraesCS3A02G516400.1	brown
TraesCS3B02G279800.1	brown
TraesCS3B02G337600.1	brown
TraesCS3B02G349500.1	brown
TraesCS3B02G398100.1	brown
TraesCS3D02G035000.1	brown
TraesCS4A02G068300.1	brown
TraesCS4B02G231000.1	brown
TraesCS4B02G390400.1	brown
TraesCS5B02G313000.1	brown
TraesCS5B02G407400.1	brown
TraesCS6A02G302100.2	brown
TraesCS6B02G067400.1	brown
TraesCS6B02G143000.1	brown
TraesCS6D02G057200.1	brown
TraesCS7A02G479600.1	brown
TraesCS7B02G035200.1	brown
TraesCS7B02G083000.1	brown
TraesCS7B02G290100.2	brown
TraesCS7D02G121500.1	brown
TraesCS7D02G252500.2	brown
TraesCSU02G058300.1	brown
PB.10872.1	brown
PB.12621.2	brown
PB.14385.1	brown
PB.16473.2	brown
PB.16565.1	brown
PB.20053.4	brown			Z168N vs. Y13N
PB.242.2	brown
PB.24338.2	brown
PB.27240.2	brown			Z168N vs. Y13N
PB.32058.4	brown
PB.35864.1	brown
PB.38477.1	brown
PB.43464.4	brown			Z168N vs. Y13N
PB.804.1	brown
PB.8890.1	brown
PB.9014.1	brown			Z168N vs. Y13N
TraesCS1A02G313500.2	brown
TraesCS1D02G221400.1	brown
TraesCS1D02G330700.2	brown
TraesCS1D02G452600.3	brown
TraesCS2D02G000300.1	brown
TraesCS2D02G095800.1	brown
TraesCS2D02G219400.1	brown
TraesCS3A02G257600.1	brown
TraesCS3B02G386600.1	brown
TraesCS3B02G399300.1	brown
TraesCS3B02G403600.1	brown
TraesCS3B02G477700.1	brown
TraesCS3D02G117200.1	brown
TraesCS3D02G393600.1	brown
TraesCS4B02G000200.1	brown
TraesCS4B02G371700.1	brown
TraesCS5A02G182000.1	brown
TraesCS5A02G219900.1	brown
TraesCS5B02G452500.1	brown
TraesCS5D02G163700.1	brown
TraesCS6B02G245600.1	brown
TraesCS6B02G443300.1	brown
TraesCS7A02G391100.1	brown
TraesCS7D02G056500.1	brown
TraesCS7D02G145600.1	brown
TraesCS7D02G277100.1	brown
PB.10876.1	brown
PB.11259.10	brown			Z168N vs. Y13N
PB.12986.1	brown
PB.13239.1	brown
PB.15094.1	brown
PB.151.1	brown
PB.16054.2	brown
PB.17068.1	brown
PB.17190.2	brown
PB.1832.5	brown
PB.18427.5	brown			Z168N vs. Y13N
PB.18428.2	brown
PB.19281.1	brown
PB.19678.1	brown
PB.19812.1	brown
PB.20034.1	brown
PB.20420.1	brown
PB.20450.3	brown
PB.213.6	brown
PB.21623.1	brown
PB.21814.1	brown
PB.2215.2	brown
PB.22383.2	brown
PB.22471.1	brown			Z168N vs. Y13N
PB.22804.1	brown
PB.2365.1	brown
PB.24578.2	brown
PB.246.1	brown
PB.24625.3	brown
PB.24633.1	brown
PB.25337.1	brown
PB.25340.1	brown
PB.25547.2	brown
PB.2624.1	brown
PB.267.1	brown
PB.26932.2	brown
PB.27535.1	brown
PB.29280.1	brown
PB.29863.1	brown
PB.30006.1	brown			Z168N vs. Y13N
PB.30583.2	brown			Z168N vs. Y13N
PB.31133.1	brown
PB.31820.2	brown
PB.32742.2	brown
PB.32973.1	brown
PB.32975.1	brown
PB.33590.1	brown
PB.33670.1	brown
PB.34354.1	brown
PB.34666.2	brown
PB.3546.1	brown
PB.35690.1	brown
PB.35724.1	brown
PB.36806.1	brown
PB.36836.1	brown
PB.37462.2	brown
PB.37739.4	brown
PB.3807.1	brown
PB.3843.1	brown
PB.38909.115	brown
PB.38909.117	brown
PB.38909.131	brown
PB.39520.1	brown
PB.39836.1	brown
PB.39932.1	brown
PB.40070.3	brown
PB.40078.1	brown
PB.40079.1	brown
PB.40123.3	brown
PB.40173.1	brown
PB.40276.2	brown
PB.41124.1	brown
PB.41657.1	brown
PB.41666.1	brown
PB.4182.1	brown
PB.42480.1	brown
PB.42841.4	brown
PB.43127.1	brown
PB.43444.3	brown
PB.44197.2	brown
PB.44474.1	brown
PB.44788.1	brown
PB.45854.2	brown			Z168N vs. Y13N
PB.46282.1	brown
PB.46333.1	brown
PB.4844.3	brown
PB.49999.1	brown
PB.50460.19	brown
PB.50460.20	brown
PB.50510.1	brown
PB.50803.1	brown
PB.540.1	brown
PB.613.1	brown
PB.657.1	brown
PB.7367.1	brown
PB.7499.5	brown
PB.7657.1	brown
PB.813.1	brown
PB.9068.1	brown
PB.9160.3	brown
PB.9403.1	brown
PB.9704.1	brown
TraesCS1A02G164900.1	brown
TraesCS1B02G159000.1	brown
TraesCS1D02G005700.1	brown
TraesCS1D02G382900.1	brown			Z168N vs. Y13N
TraesCS2A02G417900.3	brown
TraesCS2A02G471600.1	brown
TraesCS2A02G504900.1	brown
TraesCS2D02G162600.1	brown
TraesCS3A02G352300.1	brown
TraesCS3A02G460900.1	brown
TraesCS3A02G529800.1	brown
TraesCS3B02G114300.1	brown
TraesCS3B02G390800.1	brown
TraesCS3B02G560400.1	brown
TraesCS3D02G362300.1	brown
TraesCS3D02G419700.1	brown
TraesCS3D02G463500.1	brown
TraesCS4A02G092800.1	brown
TraesCS4B02G011100.1	brown
TraesCS4B02G224800.1	brown
TraesCS4B02G230600.1	brown
TraesCS4B02G278100.1	brown
TraesCS4B02G390300.1	brown
TraesCS4D02G000500.1	brown
TraesCS4D02G059000.1	brown
TraesCS4D02G313900.3	brown
TraesCS5A02G055200.1	brown
TraesCS5A02G100100.2	brown			Z168N vs. Y13N
TraesCS5B02G243400.1	brown
TraesCS5B02G431100.1	brown
TraesCS5B02G550900.1	brown
TraesCS5D02G047565.1	brown
TraesCS5D02G105900.1	brown
TraesCS5D02G113900.2	brown
TraesCS5D02G137000.1	brown
TraesCS6B02G068400.1	brown
TraesCS6B02G249100.1	brown
TraesCS6B02G278900.1	brown
TraesCS6B02G456700.1	brown
TraesCS6D02G123600.1	brown
TraesCS6D02G295900.1	brown
TraesCS7A02G182600.1	brown
TraesCS7B02G031000.1	brown
TraesCS7B02G082900.1	brown
TraesCS7B02G267200.1	brown
TraesCS7D02G249800.1	brown
PB.12152.3	brown			Z168N vs. Y13N
PB.12299.1	brown
PB.13910.1	brown
PB.15988.2	brown
PB.17504.1	brown
PB.18699.5	brown
PB.20240.2	brown
PB.2199.1	brown
PB.24491.3	brown
PB.27469.2	brown
PB.31931.2	brown
PB.33991.4	brown
PB.35737.2	brown
PB.36383.1	brown
PB.41446.1	brown			Z168N vs. Y13N
PB.44185.1	brown
PB.45560.6	brown			Z168N vs. Y13N
PB.45979.2	brown
PB.47494.2	brown
PB.48845.5	brown
PB.5875.1	brown
PB.8580.2	brown
TraesCS1B02G343100.1	brown
TraesCS1D02G140800.2	brown			Z168N vs. Y13N
TraesCS2A02G124200.1	brown
TraesCS2A02G501000.1	brown
TraesCS2B02G436100.1	brown
TraesCS2D02G512200.1	brown
TraesCS3A02G300900.1	brown
TraesCS3B02G041800.1	brown
TraesCS3D02G510000.1	brown
TraesCS5A02G177100.1	brown
TraesCS5B02G120600.1	brown
TraesCS6B02G386100.1	brown
TraesCS6B02G422200.1	brown
TraesCS6D02G043900.1	brown
TraesCS7A02G460600.1	brown
TraesCS7D02G016700.1	brown
TraesCS7D02G220800.3	brown
PB.11040.1	brown
PB.13034.1	brown
PB.14399.1	brown
PB.1445.2	brown
PB.15682.1	brown
PB.16177.1	brown
PB.18803.1	brown
PB.21922.1	brown
PB.22367.2	brown
PB.23796.1	brown
PB.24239.2	brown
PB.26797.2	brown
PB.27958.1	brown
PB.28197.1	brown
PB.28373.1	brown
PB.29982.1	brown
PB.33784.1	brown
PB.34128.1	brown
PB.34176.2	brown
PB.34480.1	brown
PB.35397.2	brown
PB.37798.2	brown
PB.38908.3	brown
PB.4103.2	brown
PB.41400.1	brown
PB.43129.1	brown
PB.43259.1	brown
PB.44490.1	brown
PB.44775.2	brown
PB.45413.1	brown
PB.46524.2	brown
PB.47320.1	brown
PB.47740.3	brown
PB.48346.1	brown
PB.50460.4	brown
PB.50771.1	brown
PB.5456.2	brown
PB.6303.1	brown
PB.8269.2	brown
PB.9834.2	brown
TraesCS1A02G000400.1	brown
TraesCS1A02G400700.1	brown
TraesCS1B02G396000.1	brown
TraesCS1D02G240300.1	brown
TraesCS1D02G433100.1	brown
TraesCS2A02G010900.1	brown
TraesCS2A02G401600.1	brown
TraesCS2B02G359300.1	brown
TraesCS2B02G412300.1	brown
TraesCS2D02G122600.1	brown
TraesCS2D02G399000.1	brown
TraesCS3A02G378700.1	brown
TraesCS3A02G460500.1	brown
TraesCS3B02G453800.1	brown
TraesCS3D02G218800.1	brown
TraesCS4B02G102700.1	brown
TraesCS4D02G091600.1	brown
TraesCS6B02G346700.1	brown
TraesCS7A02G189600.1	brown
TraesCS7A02G273600.1	brown
TraesCS7D02G179100.1	brown
TraesCS7D02G179600.1	brown
PB.10679.1	brown
PB.1202.4	brown			Z168N vs. Y13N
PB.12730.1	brown
PB.14972.1	brown
PB.17991.2	brown
PB.18167.1	brown
PB.1911.5	brown
PB.23115.1	brown
PB.26398.6	brown
PB.31475.3	brown
PB.347.4	brown
PB.37370.1	brown
PB.40104.3	brown
PB.42038.2	brown
PB.42946.5	brown			Z168N vs. Y13N
PB.44655.4	brown
PB.4491.8	brown
PB.46256.1	brown
PB.47451.2	brown
PB.49157.1	brown
PB.7172.2	brown
TraesCS1A02G108500.1	brown
TraesCS1A02G259900.1	brown
TraesCS1B02G312500.1	brown
TraesCS1B02G312800.1	brown
TraesCS1D02G084100.1	brown
TraesCS1D02G406800.1	brown
TraesCS2B02G227100.1	brown
TraesCS2D02G107300.1	brown
TraesCS2D02G117800.1	brown
TraesCS2D02G466700.2	brown
TraesCS3B02G404500.1	brown
TraesCS3D02G265800.1	brown
TraesCS4B02G145000.1	brown
TraesCS5A02G398100.2	brown
TraesCS6B02G012800.1	brown
TraesCS6B02G313600.1	brown
TraesCS6D02G011600.1	brown
TraesCS6D02G095500.1	brown
TraesCS6D02G145800.1	brown
TraesCS6D02G187700.1	brown
TraesCS7B02G015500.1	brown
TraesCS7B02G162000.3	brown
TraesCS7D02G250900.1	brown
TraesCS7D02G411400.1	brown
TraesCS7D02G435600.2	brown
TraesCSU02G093700.1	brown
PB.10638.2	brown
PB.11265.3	brown
PB.12019.1	brown
PB.12600.1	brown
PB.13862.1	brown
PB.15135.1	brown
PB.15341.2	brown
PB.17191.1	brown
PB.17821.5	brown			Z168N vs. Y13N
PB.18039.1	brown
PB.18236.2	brown
PB.1901.1	brown
PB.2006.5	brown			Z168N vs. Y13N
PB.20143.2	brown
PB.20546.3	brown
PB.21740.3	brown
PB.23796.2	brown
PB.25707.1	brown
PB.29203.1	brown
PB.32261.1	brown
PB.34838.2	brown
PB.35384.1	brown
PB.38043.1	brown
PB.41414.1	brown
PB.44552.1	brown
PB.45636.4	brown
PB.45705.4	brown
PB.4877.1	brown
PB.48934.1	brown
PB.49544.1	brown
TraesCS1B02G456500.1	brown
TraesCS1D02G114500.1	brown
TraesCS2A02G109100.1	brown
TraesCS2A02G156800.2	brown
TraesCS2B02G610700.1	brown
TraesCS3A02G365800.1	brown
TraesCS3B02G461100.1	brown
TraesCS3D02G041800.1	brown
TraesCS3D02G076000.1	brown
TraesCS3D02G295800.1	brown
TraesCS5B02G495900.3	brown
TraesCS5D02G389300.1	brown
TraesCS6B02G097900.1	brown
TraesCS6B02G409000.1	brown
TraesCS7B02G478200.1	brown
TraesCS7D02G179000.1	brown
TraesCSU02G104300.1	brown
PB.12484.6	brown			Z168N vs. Y13N
PB.13276.4	brown
PB.13865.3	brown
PB.18463.3	brown
PB.19165.2	brown			Z168N vs. Y13N
PB.19603.2	brown
PB.20368.3	brown			Z168N vs. Y13N
PB.21109.1	brown
PB.22600.6	brown
PB.22738.1	brown
PB.23206.1	brown
PB.23338.1	brown
PB.24211.2	brown
PB.25067.3	brown
PB.28370.1	brown
PB.29751.4	brown			Z168N vs. Y13N
PB.32011.1	brown
PB.35914.2	brown
PB.36068.2	brown			Z168N vs. Y13N
PB.39119.1	brown
PB.43068.1	brown
PB.45755.1	brown
PB.45773.1	brown
PB.47443.1	brown
PB.48482.1	brown
PB.5995.3	brown
PB.6530.4	brown			Z168N vs. Y13N
PB.7092.3	brown			Z168N vs. Y13N
PB.8394.1	brown
TraesCS1A02G133800.1	brown
TraesCS1A02G213900.2	brown
TraesCS1D02G370400.1	brown
TraesCS2A02G294900.1	brown
TraesCS2B02G200100.1	brown
TraesCS3A02G097100.1	brown
TraesCS3A02G267400.1	brown
TraesCS4A02G018800.1	brown
TraesCS4B02G126600.1	brown
TraesCS4D02G039300.1	brown
TraesCS4D02G066600.1	brown
TraesCS5A02G406200.1	brown
TraesCS5B02G133600.1	brown
TraesCS7A02G251900.1	brown
TraesCS7B02G296200.1	brown
PB.10601.3	brown
PB.11923.1	brown
PB.1341.5	brown
PB.13708.6	brown
PB.18195.1	brown
PB.18602.1	brown
PB.18831.1	brown
PB.19131.1	brown
PB.19432.4	brown
PB.23537.1	brown
PB.23812.1	brown
PB.24141.1	brown
PB.24227.2	brown			Z168N vs. Y13N
PB.25519.5	brown			Z168N vs. Y13N
PB.266.3	brown
PB.34396.1	brown
PB.35041.1	brown
PB.35110.1	brown
PB.36574.1	brown
PB.37052.2	brown			Z168N vs. Y13N
PB.3714.1	brown
PB.38385.2	brown
PB.39398.1	brown
PB.39444.1	brown
PB.39830.2	brown			Z168N vs. Y13N
PB.39981.5	brown
PB.41125.2	brown
PB.45705.5	brown
PB.46555.3	brown
PB.4692.4	brown
PB.47214.2	brown
PB.8531.1	brown
TraesCS1A02G248000.1	brown
TraesCS1A02G375600.1	brown			Z168N vs. Y13N
TraesCS2A02G066700.1	brown
TraesCS2A02G334300.1	brown
TraesCS2A02G440800.1	brown
TraesCS3B02G384900.1	brown
TraesCS3D02G358900.2	brown
TraesCS4B02G059200.1	brown
TraesCS5A02G201200.1	brown
TraesCS6B02G255400.1	brown
TraesCS6D02G014900.2	brown
TraesCS7B02G009400.2	brown
TraesCS7B02G083100.1	brown
TraesCS7B02G263400.1	brown
PB.11075.1	brown
PB.13538.2	brown
PB.14256.2	brown			Z168N vs. Y13N
PB.21367.2	brown
PB.23045.1	brown
PB.23194.1	brown
PB.23221.3	brown
PB.24133.1	brown
PB.24275.2	brown			Z168N vs. Y13N
PB.30365.2	brown
PB.30589.1	brown
PB.3099.1	brown
PB.32657.3	brown
PB.32804.1	brown
PB.33267.3	brown			Z168N vs. Y13N
PB.34469.1	brown
PB.38035.1	brown			Z168N vs. Y13N
PB.38267.1	brown
PB.3846.1	brown
PB.38575.3	brown
PB.41373.2	brown			Z168N vs. Y13N
PB.4185.76	brown			Z168N vs. Y13N
PB.42853.1	brown
PB.4340.1	brown
PB.44387.1	brown
PB.6921.1	brown
PB.7173.4	brown
TraesCS1A02G089300.1	brown
TraesCS1B02G174400.1	brown
TraesCS1D02G156100.1	brown
TraesCS2A02G463200.1	brown
TraesCS2B02G342600.1	brown
TraesCS2D02G499100.1	brown
TraesCS3A02G214400.1	brown
TraesCS3A02G239500.1	brown
TraesCS3A02G531200.1	brown
TraesCS3B02G240600.1	brown
TraesCS3B02G303300.1	brown
TraesCS3D02G206100.1	brown
TraesCS4A02G064300.1	brown
TraesCS4A02G157700.1	brown
TraesCS5A02G239300.1	brown
TraesCS5B02G082600.1	brown
TraesCS5B02G091200.1	brown
TraesCS5B02G248700.1	brown
TraesCS5D02G278500.1	brown
TraesCS6A02G191500.1	brown
TraesCS6A02G375800.1	brown
TraesCS6B02G422000.1	brown
TraesCS6D02G272400.1	brown
TraesCS7B02G255100.2	brown
TraesCS7D02G227200.1	brown
PB.11274.3	brown			Z168N vs. Y13N
PB.11782.1	brown
PB.17893.4	brown
PB.18578.2	brown			Z168N vs. Y13N
PB.2006.4	brown			Z168N vs. Y13N
PB.211.1	brown			Z168N vs. Y13N
PB.22542.1	brown
PB.25197.1	brown
PB.25836.3	brown			Z168N vs. Y13N
PB.26352.1	brown
PB.26412.1	brown
PB.27734.10	brown
PB.3318.2	brown
PB.35712.1	brown
PB.3583.2	brown
PB.36219.2	brown
PB.39075.2	brown
PB.39441.1	brown
PB.40077.2	brown
PB.41923.2	brown
PB.4330.10	brown
PB.44197.1	brown
PB.4579.1	brown
PB.47771.1	brown
PB.49991.1	brown
PB.50509.1	brown
PB.8406.2	brown
TraesCS1B02G403900.1	brown
TraesCS2A02G066800.1	brown
TraesCS2B02G182300.1	brown
TraesCS2B02G396500.1	brown
TraesCS2D02G137900.1	brown
TraesCS3A02G088100.1	brown
TraesCS3B02G131300.1	brown
TraesCS3B02G247200.1	brown
TraesCS3B02G406100.1	brown
TraesCS3B02G432500.1	brown
TraesCS3B02G610000.1	brown
TraesCS4A02G118200.1	brown
TraesCS6A02G266000.1	brown
TraesCS6A02G316200.1	brown
TraesCS6D02G123700.1	brown
TraesCS6D02G322300.1	brown
TraesCS7A02G145500.1	brown
TraesCS7A02G177700.1	brown
TraesCS7B02G156800.1	brown
TraesCS7B02G434800.1	brown
TraesCS7D02G130100.1	brown
TraesCSU02G175200.1	brown
PB.12378.3	brown
PB.13200.3	brown
PB.1355.1	brown
PB.14563.1	brown			Z168N vs. Y13N
PB.15862.1	brown
PB.16732.4	brown
PB.20633.1	brown
PB.23538.2	brown
PB.23637.2	brown
PB.24769.2	brown
PB.24771.1	brown
PB.25201.1	brown
PB.26337.2	brown
PB.29122.1	brown
PB.31906.2	brown
PB.32047.2	brown
PB.33102.1	brown			Z168N vs. Y13N
PB.34384.1	brown
PB.37163.4	brown			Z168N vs. Y13N
PB.38235.2	brown
PB.42852.4	brown
PB.49440.2	brown			Z168N vs. Y13N
PB.9480.1	brown
PB.9534.2	brown
PB.9926.2	brown
TraesCS1A02G306400.1	brown
TraesCS1B02G471300.1	brown
TraesCS1D02G198700.1	brown
TraesCS2A02G333400.1	brown
TraesCS2A02G396400.1	brown
TraesCS2A02G419600.1	brown			Z168N vs. Y13N
TraesCS2A02G528300.1	brown
TraesCS2B02G126400.1	brown
TraesCS2B02G453500.1	brown
TraesCS2B02G470100.1	brown
TraesCS2D02G342600.1	brown
TraesCS3A02G426200.1	brown
TraesCS3B02G071000.1	brown
TraesCS3D02G142300.1	brown
TraesCS3D02G474400.1	brown
TraesCS4A02G076800.1	brown
TraesCS4A02G141700.1	brown
TraesCS4A02G250600.1	brown
TraesCS4B02G029300.1	brown
TraesCS4B02G256000.1	brown
TraesCS4D02G245400.1	brown
TraesCS5A02G090000.1	brown
TraesCS5A02G128500.1	brown
TraesCS5B02G006800.1	brown
TraesCS5B02G022900.1	brown
TraesCS5B02G148100.2	brown
TraesCS5B02G199400.1	brown
TraesCS5B02G335500.1	brown
TraesCS5B02G389300.1	brown
TraesCS6D02G236100.1	brown
TraesCS6D02G338500.1	brown
TraesCS6D02G357600.1	brown
TraesCS7A02G049100.1	brown
TraesCS7B02G156100.1	brown
TraesCS7B02G492200.1	brown
TraesCS7D02G130600.1	brown
TraesCS7D02G355200.1	brown
TraesCS7D02G516500.1	brown
TraesCSU02G023500.2	brown
PB.10402.1	brown
PB.10690.2	brown
PB.11741.2	brown
PB.13924.2	brown
PB.15029.1	brown
PB.15795.1	brown
PB.16140.1	brown
PB.16199.1	brown
PB.17702.3	brown
PB.17933.1	brown
PB.18208.1	brown
PB.18409.1	brown
PB.19858.1	brown
PB.19930.3	brown
PB.19940.1	brown
PB.2000.1	brown
PB.2037.3	brown
PB.20911.1	brown
PB.23138.5	brown
PB.26443.3	brown
PB.266.1	brown
PB.27424.1	brown
PB.29615.1	brown
PB.30125.15	brown			Z168N vs. Y13N
PB.31829.2	brown
PB.3383.3	brown
PB.3466.1	brown
PB.36915.4	brown
PB.38909.141	brown
PB.39443.1	brown
PB.42797.2	brown
PB.44314.3	brown
PB.44689.1	brown
PB.4510.1	brown
PB.45705.3	brown
PB.45885.1	brown
PB.46477.1	brown
PB.46509.2	brown
PB.47036.4	brown			Z168N vs. Y13N
PB.47215.1	brown
PB.47911.2	brown
PB.47986.6	brown
PB.4844.4	brown			Z168N vs. Y13N
PB.4844.5	brown			Z168N vs. Y13N
PB.49473.1	brown
PB.50815.1	brown
PB.5642.1	brown
PB.647.2	brown
PB.6513.7	brown			Z168N vs. Y13N
PB.8129.1	brown
PB.869.2	brown
PB.9977.1	brown
TraesCS1A02G003700.1	brown
TraesCS1A02G248200.1	brown
TraesCS1B02G133200.1	brown
TraesCS1B02G361800.1	brown
TraesCS1B02G446900.1	brown
TraesCS2A02G379600.1	brown
TraesCS2B02G232600.1	brown
TraesCS2B02G430500.1	brown
TraesCS3A02G211200.1	brown
TraesCS3A02G321900.1	brown
TraesCS3D02G366600.1	brown
TraesCS4A02G473900.1	brown
TraesCS4B02G131900.1	brown
TraesCS5D02G165000.1	brown
TraesCS5D02G252600.1	brown
TraesCS6D02G355600.1	brown
TraesCS7A02G045900.1	brown
TraesCS7B02G154700.1	brown
TraesCS7B02G334700.1	brown
TraesCS7D02G189400.1	brown
PB.10401.2	brown			Z168N vs. Y13N
PB.11001.3	brown			Z168N vs. Y13N
PB.11126.7	brown			Z168N vs. Y13N
PB.11423.1	brown
PB.12333.1	brown
PB.12369.2	brown
PB.12661.2	brown
PB.12898.1	brown
PB.13927.1	brown
PB.15208.1	brown
PB.1583.1	brown			Z168N vs. Y13N
PB.16143.1	brown
PB.16481.4	brown
PB.1722.3	brown
PB.18156.2	brown			Z168N vs. Y13N
PB.18188.1	brown
PB.18608.3	brown
PB.18882.3	brown
PB.19629.1	brown
PB.19684.2	brown
PB.20440.2	brown
PB.2093.12	brown
PB.21187.1	brown
PB.21464.3	brown
PB.2157.3	brown
PB.22057.1	brown
PB.22371.3	brown
PB.23308.1	brown
PB.24575.1	brown
PB.24912.2	brown
PB.24945.4	brown
PB.25249.1	brown			Z168N vs. Y13N
PB.25978.4	brown
PB.26537.7	brown			Z168N vs. Y13N
PB.26768.15	brown
PB.28009.2	brown
PB.28063.5	brown
PB.28175.1	brown
PB.29464.1	brown			Z168N vs. Y13N
PB.29464.3	brown			Z168N vs. Y13N
PB.29497.3	brown
PB.2964.2	brown
PB.29725.1	brown
PB.30157.2	brown
PB.30573.2	brown			Z168N vs. Y13N
PB.30831.3	brown			Z168N vs. Y13N
PB.316.10	brown
PB.31813.2	brown
PB.31967.2	brown
PB.33141.1	brown
PB.339.3	brown
PB.35324.7	brown
PB.35508.1	brown
PB.35562.8	brown			Z168N vs. Y13N
PB.35853.4	brown			Z168N vs. Y13N
PB.35888.1	brown			Z168N vs. Y13N
PB.36377.1	brown
PB.36409.1	brown
PB.36516.3	brown
PB.36860.1	brown
PB.3702.1	brown
PB.38209.2	brown
PB.38874.3	brown
PB.39126.3	brown
PB.39418.6	brown			Z168N vs. Y13N
PB.39633.1	brown
PB.39824.5	brown
PB.40345.2	brown			Z168N vs. Y13N
PB.40594.2	brown
PB.41162.2	brown
PB.41946.1	brown
PB.42893.10	brown			Z168N vs. Y13N
PB.43000.1	brown
PB.43613.2	brown
PB.4387.6	brown
PB.44266.1	brown
PB.4428.6	brown
PB.44354.3	brown
PB.4491.12	brown
PB.4491.4	brown
PB.45125.2	brown			Z168N vs. Y13N
PB.45686.4	brown
PB.45794.5	brown
PB.46167.1	brown
PB.46537.1	brown
PB.46815.2	brown
PB.46822.6	brown
PB.46834.2	brown
PB.46912.1	brown
PB.47000.1	brown
PB.47036.7	brown			Z168N vs. Y13N
PB.4801.2	brown			Z168N vs. Y13N
PB.48143.1	brown
PB.48896.2	brown
PB.48915.1	brown
PB.49547.1	brown
PB.49628.1	brown			Z168N vs. Y13N
PB.50445.5	brown			Z168N vs. Y13N
PB.50506.1	brown
PB.50690.3	brown
PB.5076.4	brown
PB.5244.1	brown
PB.5326.2	brown
PB.584.4	brown			Z168N vs. Y13N
PB.6659.1	brown
PB.8824.6	brown			Z168N vs. Y13N
PB.9044.3	brown
PB.9823.2	brown
TraesCS1A02G135300.1	brown			Z168N vs. Y13N
TraesCS1A02G172600.1	brown
TraesCS1A02G444200.1	brown
TraesCS1B02G055200.1	brown
TraesCS1B02G169200.1	brown
TraesCS1B02G221400.1	brown
TraesCS1B02G362700.1	brown
TraesCS1B02G410800.1	brown
TraesCS1D02G125300.1	brown
TraesCS1D02G312900.1	brown
TraesCS1D02G336000.1	brown
TraesCS1D02G405800.1	brown			Z168N vs. Y13N
TraesCS2A02G041300.1	brown
TraesCS2A02G173800.1	brown
TraesCS2A02G291500.1	brown
TraesCS2A02G318800.2	brown
TraesCS2A02G357500.1	brown			Z168N vs. Y13N
TraesCS2B02G066100.1	brown
TraesCS2B02G136700.1	brown
TraesCS2B02G307500.1	brown
TraesCS2B02G337100.1	brown
TraesCS2B02G376800.1	brown
TraesCS2B02G424300.1	brown
TraesCS2B02G429800.2	brown
TraesCS2B02G458600.1	brown
TraesCS2B02G539900.1	brown
TraesCS2B02G544700.1	brown
TraesCS2B02G545600.2	brown
TraesCS2B02G594700.1	brown
TraesCS2D02G166600.1	brown
TraesCS2D02G185600.1	brown
TraesCS2D02G236500.1	brown
TraesCS2D02G274900.1	brown
TraesCS2D02G289100.1	brown
TraesCS2D02G381000.1	brown
TraesCS2D02G394500.1	brown
TraesCS2D02G413100.1	brown
TraesCS2D02G499000.1	brown
TraesCS2D02G574200.2	brown
TraesCS3A02G048300.1	brown
TraesCS3A02G108500.1	brown
TraesCS3A02G285900.1	brown
TraesCS3A02G333700.1	brown
TraesCS3A02G335300.1	brown
TraesCS3A02G509300.1	brown
TraesCS3B02G092800.1	brown
TraesCS3B02G263100.1	brown
TraesCS3B02G292000.1	brown
TraesCS3B02G310500.1	brown
TraesCS3B02G325800.1	brown
TraesCS3B02G485000.1	brown
TraesCS3B02G537600.1	brown
TraesCS3B02G581900.1	brown
TraesCS3D02G224500.1	brown
TraesCS3D02G395000.1	brown
TraesCS4A02G038300.1	brown
TraesCS4A02G100100.1	brown
TraesCS4A02G104000.1	brown
TraesCS4A02G165900.1	brown
TraesCS4B02G088600.1	brown
TraesCS4B02G121600.1	brown
TraesCS4D02G081200.1	brown
TraesCS4D02G134400.1	brown
TraesCS4D02G150100.2	brown
TraesCS4D02G322800.2	brown
TraesCS4D02G323000.1	brown
TraesCS5A02G008800.1	brown
TraesCS5A02G034200.1	brown
TraesCS5A02G063300.1	brown
TraesCS5A02G075300.1	brown
TraesCS5A02G098300.1	brown
TraesCS5A02G303000.1	brown
TraesCS5A02G317100.1	brown
TraesCS5A02G375000.1	brown
TraesCS5B02G071100.1	brown
TraesCS5B02G080400.2	brown
TraesCS5B02G087200.1	brown
TraesCS5B02G095900.1	brown
TraesCS5B02G486700.1	brown
TraesCS5B02G524200.1	brown
TraesCS5B02G536800.1	brown
TraesCS5D02G103600.1	brown
TraesCS5D02G117000.1	brown
TraesCS5D02G119200.1	brown			Z168N vs. Y13N
TraesCS5D02G152100.1	brown
TraesCS5D02G163100.1	brown
TraesCS5D02G190600.1	brown
TraesCS5D02G228100.1	brown
TraesCS5D02G486100.1	brown
TraesCS6A02G163500.1	brown
TraesCS6A02G298100.2	brown
TraesCS6A02G372000.1	brown
TraesCS6B02G099600.1	brown
TraesCS6B02G244900.1	brown
TraesCS6B02G269200.1	brown
TraesCS6D02G063300.1	brown
TraesCS6D02G187000.1	brown
TraesCS6D02G362400.1	brown
TraesCS7A02G029900.1	brown
TraesCS7A02G053100.1	brown
TraesCS7A02G083600.1	brown
TraesCS7A02G184800.1	brown
TraesCS7A02G267200.1	brown
TraesCS7A02G334200.1	brown
TraesCS7A02G384700.1	brown
TraesCS7A02G481500.1	brown			Z168N vs. Y13N
TraesCS7A02G491000.1	brown
TraesCS7A02G516600.1	brown
TraesCS7A02G552600.1	brown
TraesCS7A02G552700.1	brown
TraesCS7A02G562600.1	brown
TraesCS7B02G063000.1	brown
TraesCS7B02G067200.1	brown
TraesCS7B02G079300.1	brown
TraesCS7B02G160200.1	brown
TraesCS7B02G194600.1	brown
TraesCS7B02G202400.1	brown
TraesCS7B02G206000.1	brown
TraesCS7B02G324900.1	brown
TraesCS7B02G465000.1	brown
TraesCS7D02G116800.1	brown
TraesCS7D02G211100.1	brown
TraesCS7D02G466000.1	brown
TraesCSU02G111300.1	brown
PB.10475.1	brown
PB.10506.6	brown			Z168N vs. Y13N
PB.10803.1	brown
PB.10886.1	brown			Z168N vs. Y13N
PB.11040.2	brown
PB.11899.1	brown
PB.11932.1	brown
PB.12927.1	brown
PB.1341.6	brown
PB.13426.2	brown
PB.13441.1	brown
PB.13441.2	brown
PB.13441.3	brown
PB.13441.4	brown
PB.13862.4	brown
PB.13888.7	brown			Z168N vs. Y13N
PB.13922.1	brown
PB.13922.2	brown
PB.13996.1	brown
PB.14003.1	brown
PB.14003.3	brown
PB.14071.3	brown
PB.14368.7	brown
PB.14410.1	brown
PB.14410.3	brown
PB.14418.2	brown
PB.15536.5	brown
PB.15775.1	brown
PB.15804.2	brown
PB.16103.1	brown
PB.16597.1	brown
PB.16685.5	brown
PB.16957.1	brown
PB.17.2	brown
PB.1722.4	brown
PB.17592.1	brown
PB.17702.4	brown
PB.17743.1	brown
PB.17886.1	brown
PB.18061.5	brown
PB.18139.1	brown
PB.1821.10	brown			Z168N vs. Y13N
PB.1832.1	brown
PB.18501.1	brown
PB.18674.1	brown
PB.18831.2	brown
PB.19049.2	brown
PB.19134.2	brown
PB.19282.1	brown
PB.19314.2	brown			Z168N vs. Y13N
PB.19432.3	brown
PB.19491.1	brown
PB.19792.1	brown
PB.19924.2	brown
PB.19940.2	brown
PB.20.1	brown			Z168N vs. Y13N
PB.2006.2	brown			Z168N vs. Y13N
PB.20176.1	brown
PB.20464.2	brown
PB.20810.1	brown
PB.21022.2	brown
PB.21033.2	brown
PB.211.2	brown			Z168N vs. Y13N
PB.21240.2	brown
PB.21241.10	brown
PB.21241.7	brown
PB.21508.2	brown
PB.2160.2	brown
PB.21683.1	brown
PB.21716.3	brown			Z168N vs. Y13N
PB.21757.12	brown			Z168N vs. Y13N
PB.22031.1	brown
PB.22072.1	brown
PB.22074.1	brown
PB.22323.1	brown
PB.22621.2	brown
PB.22621.3	brown
PB.22685.4	brown
PB.22700.2	brown
PB.23005.2	brown
PB.23215.2	brown
PB.2341.1	brown
PB.23476.1	brown
PB.23795.2	brown
PB.23856.4	brown
PB.23865.1	brown
PB.23875.1	brown
PB.23875.2	brown
PB.24008.1	brown
PB.24227.3	brown			Z168N vs. Y13N
PB.24491.2	brown
PB.24534.1	brown			Z168N vs. Y13N
PB.2458.3	brown
PB.24660.1	brown
PB.24754.1	brown
PB.24956.1	brown
PB.2519.1	brown
PB.25314.1	brown
PB.25380.2	brown
PB.25513.1	brown
PB.25519.1	brown			Z168N vs. Y13N
PB.25792.1	brown
PB.25836.5	brown			Z168N vs. Y13N
PB.26059.3	brown			Z168N vs. Y13N
PB.26131.1	brown
PB.26217.1	brown
PB.26443.2	brown
PB.26549.1	brown			Z168N vs. Y13N
PB.26606.1	brown
PB.26613.3	brown
PB.26992.1	brown
PB.27028.11	brown
PB.2704.1	brown
PB.27128.1	brown
PB.27586.3	brown
PB.27648.1	brown
PB.27735.1	brown
PB.27753.2	brown
PB.27761.1	brown
PB.27811.5	brown
PB.27978.2	brown
PB.28147.1	brown
PB.28356.3	brown
PB.2842.1	brown
PB.2843.1	brown
PB.28538.1	brown
PB.28657.2	brown
PB.28836.2	brown
PB.29170.1	brown
PB.29396.2	brown
PB.29719.1	brown
PB.30009.1	brown
PB.30091.3	brown
PB.30292.1	brown
PB.30407.1	brown
PB.30407.2	brown
PB.30917.2	brown
PB.30980.3	brown
PB.31423.2	brown
PB.31836.1	brown
PB.31981.2	brown
PB.3220.1	brown
PB.32406.3	brown
PB.32489.1	brown
PB.32554.1	brown
PB.32603.2	brown
PB.32742.3	brown
PB.32744.1	brown
PB.33061.1	brown
PB.33138.1	brown
PB.33307.1	brown
PB.33610.1	brown
PB.33635.1	brown
PB.33642.2	brown
PB.33922.2	brown
PB.3489.1	brown
PB.34927.1	brown
PB.34992.1	brown			Z168N vs. Y13N
PB.35248.1	brown
PB.35318.2	brown			Z168N vs. Y13N
PB.35320.2	brown
PB.35344.4	brown
PB.35397.1	brown
PB.35460.3	brown
PB.36406.6	brown
PB.36520.4	brown
PB.36553.2	brown
PB.3685.3	brown
PB.36977.1	brown
PB.36998.1	brown
PB.37121.1	brown
PB.37655.1	brown
PB.37721.2	brown
PB.37947.3	brown
PB.38054.2	brown
PB.38743.1	brown
PB.38862.3	brown
PB.39024.1	brown
PB.39073.1	brown
PB.39074.1	brown
PB.39211.7	brown
PB.3938.3	brown			Z168N vs. Y13N
PB.39803.2	brown
PB.39809.1	brown
PB.39961.2	brown
PB.39970.2	brown
PB.4035.2	brown
PB.40452.4	brown			Z168N vs. Y13N
PB.40872.1	brown
PB.41024.1	brown
PB.4103.4	brown
PB.41200.1	brown
PB.41228.1	brown
PB.4196.1	brown
PB.42221.2	brown
PB.42419.1	brown
PB.42454.1	brown
PB.42518.1	brown
PB.42531.3	brown
PB.42893.4	brown			Z168N vs. Y13N
PB.42909.1	brown
PB.43010.1	brown
PB.43064.1	brown
PB.43255.1	brown
PB.43260.5	brown
PB.43333.1	brown
PB.43354.1	brown
PB.4386.4	brown
PB.43890.1	brown
PB.44057.1	brown
PB.44262.1	brown
PB.44294.1	brown			Z168N vs. Y13N
PB.44664.1	brown
PB.44934.1	brown
PB.45039.1	brown
PB.45418.1	brown
PB.45475.7	brown
PB.45638.1	brown
PB.45672.3	brown
PB.45695.3	brown
PB.45705.1	brown
PB.45705.2	brown
PB.4583.1	brown
PB.45886.4	brown
PB.46113.1	brown
PB.46176.1	brown
PB.46351.1	brown
PB.46351.3	brown
PB.46363.1	brown
PB.46769.3	brown			Z168N vs. Y13N
PB.46914.3	brown
PB.47334.1	brown
PB.47334.2	brown
PB.47391.1	brown
PB.47424.2	brown
PB.47466.1	brown
PB.47494.1	brown
PB.47576.1	brown
PB.47665.1	brown
PB.47743.1	brown
PB.47861.2	brown
PB.48046.2	brown
PB.48077.1	brown
PB.48124.1	brown
PB.48195.1	brown
PB.4837.2	brown			Z168N vs. Y13N
PB.48755.1	brown
PB.48944.2	brown
PB.4904.1	brown
PB.49389.1	brown
PB.49871.2	brown
PB.50186.1	brown			Z168N vs. Y13N
PB.50327.1	brown
PB.50380.74	brown
PB.50428.1	brown
PB.50460.55	brown
PB.50628.1	brown
PB.50656.3	brown			Z168N vs. Y13N
PB.50659.1	brown
PB.50686.1	brown
PB.50700.1	brown			Z168N vs. Y13N
PB.5153.1	brown
PB.5451.5	brown
PB.5673.3	brown
PB.5673.5	brown
PB.5976.1	brown
PB.6561.3	brown
PB.663.1	brown
PB.6766.3	brown
PB.6917.2	brown
PB.6974.2	brown
PB.7.1	brown
PB.7318.1	brown
PB.7549.6	brown			Z168N vs. Y13N
PB.7835.4	brown
PB.8037.2	brown
PB.8375.1	brown
PB.8462.2	brown
PB.8504.1	brown
PB.869.3	brown
PB.9037.2	brown
PB.9043.2	brown
PB.9048.1	brown
PB.9454.4	brown
PB.9605.1	brown
PB.9684.1	brown
PB.9977.2	brown
TraesCS1A02G036200.1	brown
TraesCS1A02G145000.1	brown
TraesCS1A02G170900.1	brown
TraesCS1A02G295600.1	brown
TraesCS1A02G340100.1	brown
TraesCS1A02G381400.1	brown
TraesCS1A02G395300.1	brown
TraesCS1B02G068200.1	brown
TraesCS1B02G178500.1	brown
TraesCS1B02G291800.1	brown
TraesCS1B02G294300.1	brown
TraesCS1B02G352400.1	brown
TraesCS1B02G423600.1	brown
TraesCS1D02G001000.1	brown
TraesCS1D02G053500.1	brown
TraesCS1D02G121000.1	brown
TraesCS1D02G131800.1	brown
TraesCS1D02G144000.1	brown
TraesCS1D02G154800.1	brown
TraesCS1D02G187700.1	brown
TraesCS1D02G232100.1	brown
TraesCS1D02G342100.1	brown
TraesCS1D02G403500.1	brown
TraesCS2A02G033700.1	brown
TraesCS2A02G050600.1	brown
TraesCS2A02G073700.1	brown
TraesCS2A02G105500.1	brown
TraesCS2A02G146000.1	brown
TraesCS2A02G163200.1	brown
TraesCS2A02G213200.1	brown
TraesCS2A02G277100.1	brown
TraesCS2A02G352100.1	brown
TraesCS2A02G386800.1	brown
TraesCS2A02G396100.1	brown
TraesCS2A02G424900.1	brown
TraesCS2A02G468800.1	brown
TraesCS2A02G472700.1	brown
TraesCS2A02G501300.1	brown
TraesCS2B02G047400.1	brown
TraesCS2B02G083800.1	brown
TraesCS2B02G237100.1	brown
TraesCS2B02G268600.1	brown
TraesCS2B02G404400.1	brown
TraesCS2B02G414400.1	brown
TraesCS2B02G424400.1	brown
TraesCS2B02G442600.1	brown
TraesCS2B02G495400.1	brown
TraesCS2B02G578800.1	brown
TraesCS2D02G034400.1	brown
TraesCS2D02G196200.1	brown
TraesCS2D02G250300.1	brown
TraesCS2D02G276000.2	brown
TraesCS2D02G350800.1	brown
TraesCS2D02G353100.1	brown			Z168N vs. Y13N
TraesCS2D02G383600.1	brown
TraesCS2D02G391600.1	brown
TraesCS2D02G398600.1	brown
TraesCS2D02G420800.1	brown
TraesCS3A02G034000.1	brown
TraesCS3A02G088000.1	brown
TraesCS3A02G112900.1	brown
TraesCS3A02G113000.1	brown
TraesCS3A02G113100.1	brown
TraesCS3A02G172000.2	brown
TraesCS3A02G216800.1	brown
TraesCS3A02G219600.1	brown
TraesCS3A02G274400.1	brown
TraesCS3A02G296100.1	brown
TraesCS3A02G299000.1	brown
TraesCS3A02G408700.1	brown
TraesCS3B02G049900.1	brown
TraesCS3B02G063000.1	brown
TraesCS3B02G063500.1	brown
TraesCS3B02G063600.1	brown
TraesCS3B02G114500.1	brown
TraesCS3B02G123000.1	brown
TraesCS3B02G130300.1	brown
TraesCS3B02G130400.1	brown
TraesCS3B02G130900.1	brown
TraesCS3B02G131000.1	brown
TraesCS3B02G198300.1	brown
TraesCS3B02G229900.1	brown
TraesCS3B02G257900.1	brown
TraesCS3B02G261400.1	brown
TraesCS3B02G275100.1	brown
TraesCS3B02G308100.1	brown
TraesCS3B02G315900.1	brown
TraesCS3B02G329100.1	brown
TraesCS3B02G389700.1	brown
TraesCS3B02G390700.1	brown
TraesCS3B02G432800.1	brown
TraesCS3B02G452700.1	brown
TraesCS3B02G460000.1	brown
TraesCS3B02G474900.1	brown
TraesCS3B02G561000.1	brown
TraesCS3D02G045600.1	brown
TraesCS3D02G045700.1	brown
TraesCS3D02G045800.1	brown
TraesCS3D02G046300.1	brown
TraesCS3D02G046600.1	brown
TraesCS3D02G046700.1	brown
TraesCS3D02G046800.1	brown
TraesCS3D02G114700.1	brown
TraesCS3D02G114800.1	brown
TraesCS3D02G114900.1	brown
TraesCS3D02G115000.1	brown
TraesCS3D02G115100.1	brown
TraesCS3D02G115200.1	brown
TraesCS3D02G115300.1	brown
TraesCS3D02G157300.1	brown
TraesCS3D02G273600.1	brown
TraesCS3D02G351900.1	brown
TraesCS3D02G356500.1	brown			Z168N vs. Y13N
TraesCS4A02G068200.1	brown
TraesCS4A02G076500.1	brown
TraesCS4A02G092400.1	brown
TraesCS4A02G092700.1	brown
TraesCS4A02G095500.1	brown
TraesCS4A02G097900.1	brown
TraesCS4A02G110600.1	brown
TraesCS4A02G116800.1	brown
TraesCS4A02G136500.1	brown
TraesCS4A02G142700.1	brown
TraesCS4A02G175100.1	brown
TraesCS4A02G175200.2	brown
TraesCS4A02G196900.1	brown
TraesCS4A02G228900.1	brown
TraesCS4A02G259000.1	brown
TraesCS4A02G371600.1	brown
TraesCS4B02G023600.1	brown
TraesCS4B02G038900.1	brown
TraesCS4B02G087500.1	brown
TraesCS4B02G089500.1	brown
TraesCS4B02G112700.1	brown
TraesCS4B02G116200.1	brown
TraesCS4B02G200000.1	brown
TraesCS4B02G205700.1	brown
TraesCS4B02G206700.1	brown
TraesCS4B02G211600.1	brown
TraesCS4B02G211900.1	brown
TraesCS4B02G212300.1	brown
TraesCS4B02G215200.1	brown
TraesCS4B02G225400.1	brown
TraesCS4B02G243400.1	brown
TraesCS4B02G366400.1	brown
TraesCS4B02G380800.1	brown
TraesCS4D02G008700.1	brown
TraesCS4D02G021200.1	brown
TraesCS4D02G035800.1	brown
TraesCS4D02G086200.1	brown
TraesCS4D02G087800.1	brown
TraesCS4D02G134900.1	brown
TraesCS4D02G145500.1	brown
TraesCS4D02G145600.1	brown
TraesCS4D02G151100.1	brown
TraesCS4D02G189200.1	brown
TraesCS4D02G194500.1	brown
TraesCS4D02G206600.1	brown
TraesCS4D02G207500.1	brown
TraesCS4D02G209700.1	brown
TraesCS4D02G212300.1	brown
TraesCS4D02G212400.1	brown
TraesCS4D02G213100.1	brown
TraesCS4D02G213300.1	brown
TraesCS4D02G226000.1	brown
TraesCS4D02G251700.1	brown
TraesCS4D02G295300.1	brown
TraesCS5A02G153400.1	brown
TraesCS5A02G163900.1	brown
TraesCS5A02G228800.1	brown
TraesCS5A02G251000.1	brown
TraesCS5A02G257700.1	brown
TraesCS5A02G273200.1	brown
TraesCS5A02G296200.1	brown
TraesCS5A02G331300.1	brown
TraesCS5A02G384100.1	brown
TraesCS5A02G426100.1	brown
TraesCS5A02G520200.1	brown
TraesCS5A02G534200.1	brown
TraesCS5A02G547300.1	brown
TraesCS5A02G557600.1	brown
TraesCS5B02G097600.1	brown
TraesCS5B02G128100.1	brown
TraesCS5B02G146500.1	brown
TraesCS5B02G163200.1	brown
TraesCS5B02G219500.1	brown
TraesCS5B02G223800.1	brown
TraesCS5B02G227900.1	brown
TraesCS5B02G257000.1	brown
TraesCS5B02G260200.1	brown
TraesCS5B02G267900.1	brown
TraesCS5B02G272900.1	brown
TraesCS5B02G284000.1	brown
TraesCS5B02G388900.1	brown
TraesCS5B02G428000.1	brown
TraesCS5B02G503400.1	brown
TraesCS5B02G538300.1	brown
TraesCS5B02G563900.2	brown
TraesCS5D02G158300.1	brown
TraesCS5D02G191700.1	brown
TraesCS5D02G219500.1	brown
TraesCS5D02G258900.2	brown
TraesCS5D02G266000.1	brown
TraesCS5D02G269400.1	brown
TraesCS5D02G280700.1	brown
TraesCS5D02G337200.1	brown
TraesCS5D02G347000.1	brown
TraesCS5D02G395300.1	brown
TraesCS5D02G405900.1	brown
TraesCS5D02G420700.1	brown
TraesCS5D02G431500.1	brown
TraesCS5D02G434100.1	brown
TraesCS5D02G495000.1	brown
TraesCS6A02G109000.1	brown
TraesCS6A02G146400.1	brown
TraesCS6A02G181700.1	brown
TraesCS6A02G323800.1	brown
TraesCS6A02G384300.1	brown
TraesCS6B02G020900.1	brown
TraesCS6B02G065800.1	brown
TraesCS6B02G065856.1	brown			Z168N vs. Y13N
TraesCS6B02G065900.1	brown
TraesCS6B02G174500.1	brown
TraesCS6B02G187500.1	brown
TraesCS6B02G247200.1	brown
TraesCS6B02G248400.1	brown
TraesCS6B02G256600.1	brown
TraesCS6B02G344500.1	brown
TraesCS6B02G354400.1	brown
TraesCS6B02G374100.1	brown
TraesCS6D02G104000.1	brown
TraesCS6D02G135600.1	brown
TraesCS6D02G196300.1	brown
TraesCS6D02G203300.1	brown
TraesCS6D02G209600.1	brown
TraesCS6D02G293800.1	brown
TraesCS6D02G293900.1	brown
TraesCS6D02G356100.2	brown
TraesCS6D02G364400.1	brown
TraesCS6D02G393700.1	brown
TraesCS7A02G017800.1	brown
TraesCS7A02G051000.1	brown
TraesCS7A02G188300.1	brown
TraesCS7A02G202200.1	brown
TraesCS7A02G232500.1	brown
TraesCS7A02G242200.1	brown
TraesCS7A02G257100.1	brown
TraesCS7A02G330300.1	brown
TraesCS7A02G331300.1	brown
TraesCS7A02G338800.1	brown
TraesCS7A02G370000.1	brown
TraesCS7A02G394600.1	brown
TraesCS7A02G394700.1	brown
TraesCS7A02G477300.1	brown
TraesCS7B02G064000.1	brown
TraesCS7B02G064100.1	brown
TraesCS7B02G083500.1	brown
TraesCS7B02G093400.1	brown
TraesCS7B02G094500.1	brown
TraesCS7B02G095300.6	brown
TraesCS7B02G149200.1	brown
TraesCS7B02G200400.1	brown
TraesCS7B02G226100.1	brown
TraesCS7B02G243000.1	brown
TraesCS7B02G250100.1	brown
TraesCS7B02G259000.1	brown
TraesCS7B02G347100.1	brown
TraesCS7B02G388700.3	brown
TraesCS7B02G388700.4	brown
TraesCS7D02G060500.1	brown
TraesCS7D02G068800.1	brown
TraesCS7D02G088200.1	brown
TraesCS7D02G179400.1	brown
TraesCS7D02G232600.1	brown
TraesCS7D02G241100.1	brown
TraesCS7D02G270600.1	brown
TraesCS7D02G282500.1	brown
TraesCS7D02G327100.1	brown
TraesCS7D02G339600.2	brown
TraesCS7D02G346000.1	brown
TraesCS7D02G353800.1	brown
TraesCS7D02G390100.1	brown
TraesCS7D02G400200.1	brown
TraesCS7D02G444300.1	brown
TraesCS7D02G463000.1	brown
TraesCS7D02G507800.2	brown
TraesCSU02G116400.1	brown
TraesCSU02G131300.1	brown
TraesCSU02G138000.1	brown
TraesCSU02G194600.1	brown
TraesCSU02G251939.1	brown
TraesCSU02G255529.1	brown

## Sheet: Table S12
Supplementary Table S12: MEGENA module-trait relationships
Module	Correlation coefficient	pvalue
MEc5_461	0.920425	2.2e-05
MEc5_1035	0.892104	9.58e-05
MEc5_7	0.852265	0.000430158
MEc5_456	0.846083	0.000522275
MEc5_455	0.839002	0.000645816
MEc5_490	0.839002	0.000645816
MEc5_107	0.827106	0.000903064
MEc5_975	0.817762	0.0011555
MEc5_29	0.814222	0.00126414
MEc5_1614	0.810682	0.00138046
MEc5_102	0.810682	0.00138046
MEc5_463	0.800061	0.0017793
MEc5_454	0.800061	0.0017793
MEc5_1496	0.800061	0.0017793
MEc5_1167	0.800061	0.0017793
MEc5_471	0.789441	0.00226101
MEc5_976	0.782361	0.00263358
MEc5_1041	0.782361	0.00263358
MEc5_980	0.782361	0.00263358
MEc5_1498	0.782361	0.00263358
MEc5_42	0.782361	0.00263358
MEc5_1497	0.775281	0.00305122
MEc5_101	0.775281	0.00305122
MEc5_494	0.775281	0.00305122
MEc5_469	0.768201	0.00351745
MEc5_6	0.76466	0.00376991
MEc5_359	0.76466	0.00376991
MEc5_462	0.76466	0.00376991
MEc5_376	0.75404	0.00461027
MEc5_8	0.7505	0.00491963
MEc5_1028	0.74342	0.00558512
MEc5_10	0.725719	0.00754508
MEc5_468	0.722179	0.00799196
MEc5_1637	0.722179	0.00799196
MEc5_367	0.722179	0.00799196
MEc5_1067	0.711559	0.00945183
MEc5_398	0.704479	0.0105298
MEc5_28	-0.977066	4.81e-08
MEc5_17	-0.955826	1.23e-06
MEc5_39	-0.945205	3.55e-06
MEc5_261	-0.945205	3.55e-06
MEc5_23	-0.945205	3.55e-06
MEc5_16	-0.941665	4.82e-06
MEc5_1017	-0.934585	8.45e-06
MEc5_574	-0.934585	8.45e-06
MEc5_149	-0.923965	1.76e-05
MEc5_22	-0.920425	2.2e-05
MEc5_43	-0.916885	2.71e-05
MEc5_24	-0.902724	5.81e-05
MEc5_20	-0.902724	5.81e-05
MEc5_4	-0.902724	5.81e-05
MEc5_37	-0.895644	8.16e-05
MEc5_25	-0.892104	9.58e-05
MEc5_1016	-0.888564	0.000111935
MEc5_458	-0.888564	0.000111935
MEc5_33	-0.874403	0.000198607
MEc5_30	-0.874403	0.000198607
MEc5_35	-0.870863	0.000226809
MEc5_27	-0.870863	0.000226809
MEc5_140	-0.869888	0.000235105
MEc5_460	-0.863783	0.000292531
MEc5_32	-0.856703	0.000372214
MEc5_31	-0.856703	0.000372214
MEc5_281	-0.853163	0.000417902
MEc5_467	-0.842543	0.000581507
MEc5_3	-0.842543	0.000581507
MEc5_45	-0.835462	0.000715498
MEc5_491	-0.824842	0.000959881
MEc5_172	-0.810682	0.00138046
MEc5_21	-0.810682	0.00138046
MEc5_12	-0.807142	0.00150485
MEc5_13	-0.80501	0.00158379
MEc5_472	-0.73634	0.00631629
MEc5_1027	0.700939	0.0111018
MEc5_464	0.700939	0.0111018
MEc5_375	0.693859	0.0123148
MEc5_1056	0.690318	0.0129567
MEc5_459	0.690318	0.0129567
MEc5_11	0.686778	0.0136232
MEc5_1575	0.683238	0.0143146
MEc5_493	0.679698	0.0150315
MEc5_141	-0.675686	0.0158758
MEc5_395	0.665538	0.0181662
MEc5_895	0.661998	0.0190194
MEc5_465	0.658458	0.0199016
MEc5_1089	0.658458	0.0199016
MEc5_481	-0.658458	0.0199016
MEc5_362	0.654918	0.0208133
MEc5_360	0.651377	0.021755
MEc5_400	0.637217	0.0258346
MEc5_900	0.637217	0.0258346
MEc5_370	0.633677	0.0269354
MEc5_394	0.630137	0.0280697
MEc5_1725	0.626597	0.0292381
MEc5_1116	0.626597	0.0292381
MEc5_358	0.626597	0.0292381
MEc5_791	0.626597	0.0292381
MEc5_1134	-0.626597	0.0292381
MEc5_816	0.623057	0.0304411
MEc5_473	0.615976	0.0329534
MEc5_365	0.615976	0.0329534
MEc5_41	-0.612436	0.0342637
MEc5_417	0.601816	0.0384181
MEc5_378	0.591196	0.0429193
MEc5_385	0.587656	0.0444993
MEc5_97	0.587656	0.0444993
MEc5_416	0.584116	0.0461199
MEc5_931	0.584116	0.0461199
MEc5_36	-0.584116	0.0461199
MEc5_478	-0.584116	0.0461199
MEc5_396	0.580576	0.0477818
MEc5_100	0.573495	0.0512313
MEc5_9	0.573495	0.0512313
MEc5_1742	-0.573495	0.0512313
MEc5_356	0.569955	0.0530199
MEc5_2	0.562875	0.0567274
MEc5_413	0.562875	0.0567274
MEc5_99	0.562875	0.0567274
MEc5_823	0.562875	0.0567274
MEc5_5	0.552255	0.0626221
MEc5_477	-0.523934	0.080388
MEc5_475	-0.435432	0.157118
MEc5_487	-0.290288	0.360038

## Sheet: Table S13
Supplementary Table S13: Genes identified in significant MEGENA module and overlapped with WGCNA brown module
ID	WGCNA module	MEGENA module	lncRNA	lncRNA targets	DAS
PB.28925.5		c5_454	YES	TraesCS4D02G325700;TraesCS4D02G325800
PB.41552.2		c5_454	YES	TraesCS3A02G105200
PB.23999.2		c5_454	YES	TraesCS2A02G531300
PB.23999.2		c5_975	YES	TraesCS2A02G531300
PB.5298.1		c5_456	YES	TraesCS1D02G317200;TraesCS1D02G317211;TraesCS1D02G317300;TraesCS1D02G317301;TraesCS1D02G317400;TraesCS1D02G317500
PB.9183.1		c5_454	YES	PB.7835;PB.9182;TraesCS2A02G483200;TraesCS2A02G483300;TraesCS2A02G483400;TraesCS2A02G483500;TraesCS2A02G483600;TraesCS2A02G483700
PB.36021.1	brown	c5_454	YES	PB.34715;PB.34716;PB.34717;TraesCS2A02G484400;TraesCS5D02G162800;TraesCS5D02G162900;TraesCS5D02G163000;TraesCS5D02G163100
PB.2006.2	brown	c5_454			Z168N vs. Y13N
PB.14071.3	brown	c5_454
TraesCS2A02G033700.1	brown	c5_454
PB.2006.4	brown	c5_454			Z168N vs. Y13N
PB.10876.1	brown	c5_454
PB.14071.3	brown	c5_1496
PB.30583.2	brown	c5_102			Z168N vs. Y13N
PB.813.1	brown	c5_102
PB.6766.3	brown	c5_102
TraesCS4B02G230600.1	brown	c5_454
PB.16957.1	brown	c5_454
PB.20810.1	brown	c5_454
TraesCS1A02G295600.1	brown	c5_454
TraesCS3B02G461100.1	brown	c5_454
PB.25547.2	brown	c5_454
PB.13441.3	brown	c5_454
PB.28836.2	brown	c5_454
TraesCS1D02G131800.1	brown	c5_454
PB.5153.1	brown	c5_454
TraesCS2A02G386800.1	brown	c5_454
PB.14003.3	brown	c5_454
TraesCS3A02G034000.1	brown	c5_454
PB.47665.1	brown	c5_454
PB.2341.1	brown	c5_454
PB.45672.3	brown	c5_454
PB.27648.1	brown	c5_454
TraesCS5A02G547300.1	brown	c5_454
PB.604.2	brown	c5_454
TraesCS7A02G273600.1	brown	c5_456
TraesCSU02G058300.1	brown	c5_461
PB.44788.1	brown	c5_463
TraesCS1D02G342100.1	brown	c5_463
TraesCS3B02G432800.1	brown	c5_463
PB.813.1	brown	c5_490
PB.27648.1	brown	c5_975
TraesCSU02G058300.1	brown	c5_1035
TraesCS4B02G230600.1	brown	c5_1496
PB.27586.3	brown	c5_454
TraesCS3A02G285900.1	brown	c5_454
PB.4428.6	brown	c5_454
TraesCS5B02G452500.1	brown	c5_463
TraesCS3A02G285900.1	brown	c5_1496
TraesCS6B02G443300.1	brown	c5_1614
PB.33670.1	brown	c5_7
PB.22804.1	brown	c5_7
PB.42557.1	brown	c5_7
PB.31149.1	brown	c5_7
PB.37888.1	brown	c5_7
PB.36837.4	brown	c5_7			Z168N vs. Y13N
PB.22471.1	brown	c5_7			Z168N vs. Y13N
PB.18428.2	brown	c5_7
PB.50460.20	brown	c5_7
PB.2925.2	brown	c5_7
TraesCS2A02G473800.1	brown	c5_7
PB.40079.1	brown	c5_7
PB.38909.131	brown	c5_7
PB.48876.1	brown	c5_7
TraesCS1A02G038800.1	brown	c5_7
PB.24005.1	brown	c5_7
PB.6462.1	brown	c5_7
TraesCS3B02G114300.1	brown	c5_7
TraesCS4B02G390300.1	brown	c5_7
TraesCS4D02G000500.1	brown	c5_7
TraesCS5D02G047565.1	brown	c5_7
TraesCS3B02G384900.1	brown	c5_29
PB.39443.1	brown	c5_29
TraesCS5D02G486100.1	brown	c5_29
TraesCS7A02G479600.1	brown	c5_29
PB.23856.4	brown	c5_29
PB.16054.2	brown	c5_29
PB.35344.4	brown	c5_29
TraesCS2A02G352100.1	brown	c5_29
PB.9454.4	brown	c5_29
PB.46363.1	brown	c5_29
TraesCS7A02G419800.1	brown	c5_102
TraesCS6D02G355600.1	brown	c5_102
TraesCS4A02G104000.1	brown	c5_102
PB.25340.1	brown	c5_102
TraesCS5B02G243400.1	brown	c5_102
PB.25337.1	brown	c5_102
PB.35724.1	brown	c5_102
TraesCS4B02G278100.1	brown	c5_102
PB.39398.1	brown	c5_102
TraesCS6B02G409000.1	brown	c5_102
TraesCS5A02G008800.1	brown	c5_102
PB.19858.1	brown	c5_102
TraesCS3A02G509300.1	brown	c5_102
PB.37462.2	brown	c5_102
PB.2842.1	brown	c5_102
TraesCS2B02G412300.1	brown	c5_102
PB.34927.1	brown	c5_102
TraesCS2A02G504900.1	brown	c5_102
PB.50460.55	brown	c5_102
PB.39520.1	brown	c5_102
PB.7367.1	brown	c5_102
PB.40123.3	brown	c5_102
PB.27958.1	brown	c5_102
PB.24746.1	brown	c5_102
PB.11732.1	brown	c5_102
TraesCS6B02G068400.1	brown	c5_102
PB.21814.1	brown	c5_102
TraesCS6B02G278900.1	brown	c5_102
PB.44552.1	brown	c5_102
PB.27535.1	brown	c5_102
PB.30407.2	brown	c5_102
PB.45885.1	brown	c5_102
TraesCS5B02G267900.1	brown	c5_102
TraesCS5B02G503400.1	brown	c5_102
PB.2300.1	brown	c5_102
TraesCS3B02G506100.1	brown	c5_102
PB.1445.2	brown	c5_102
PB.39055.1	brown	c5_102
PB.50460.4	brown	c5_102
PB.46524.2	brown	c5_102
PB.45705.3	brown	c5_102
TraesCS2B02G424300.1	brown	c5_102
TraesCS2B02G430500.1	brown	c5_102
PB.36553.2	brown	c5_102
TraesCS4B02G011100.1	brown	c5_102
PB.36806.1	brown	c5_102
PB.10638.2	brown	c5_102
PB.20433.1	brown	c5_102
TraesCS1B02G361800.1	brown	c5_102
TraesCS2D02G413100.1	brown	c5_102
PB.48067.3	brown	c5_102
PB.24227.2	brown	c5_102			Z168N vs. Y13N
PB.9605.1	brown	c5_102
TraesCS1B02G168200.1	brown	c5_102
PB.4844.3	brown	c5_102
TraesCS1D02G232100.1	brown	c5_102
TraesCS6B02G143000.1	brown	c5_102
TraesCS7D02G377100.1	brown	c5_102
PB.45286.2	brown	c5_102
TraesCS5A02G106400.5	brown	c5_102
TraesCS4D02G091500.1	brown	c5_102
PB.25707.1	brown	c5_102
PB.2767.1	brown	c5_102
TraesCS1A02G213900.2	brown	c5_102
TraesCS6B02G363700.1	brown	c5_102
TraesCS2A02G505800.2	brown	c5_102
TraesCS3B02G244200.1	brown	c5_102
TraesCS1A02G133800.1	brown	c5_102
TraesCS2A02G294900.1	brown	c5_102
PB.41446.5	brown	c5_102			Z168N vs. Y13N
PB.47661.1	brown	c5_102
TraesCS7D02G179100.1	brown	c5_102
TraesCS2B02G414400.1	brown	c5_102
TraesCS7A02G184800.1	brown	c5_102
PB.15536.5	brown	c5_102
PB.45705.1	brown	c5_102
TraesCS5A02G520200.1	brown	c5_102
PB.11923.1	brown	c5_102
TraesCS6B02G344500.1	brown	c5_102
PB.38908.3	brown	c5_102
PB.11932.1	brown	c5_102
PB.17886.1	brown	c5_102
PB.42419.1	brown	c5_102
TraesCS3B02G474900.1	brown	c5_102
TraesCS6D02G196300.1	brown	c5_102
TraesCS3D02G395000.1	brown	c5_102
PB.37739.4	brown	c5_102
TraesCS6B02G245600.1	brown	c5_102
PB.26059.3	brown	c5_102			Z168N vs. Y13N
PB.20546.3	brown	c5_102
PB.35712.1	brown	c5_102
TraesCS2D02G219400.1	brown	c5_102
TraesCS3D02G510000.1	brown	c5_102
PB.35084.1	brown	c5_107
PB.45097.1	brown	c5_107
PB.47035.1	brown	c5_107
PB.23871.1	brown	c5_107
TraesCS1B02G070700.1	brown	c5_107
PB.39125.1	brown	c5_107
PB.29863.1	brown	c5_107
TraesCS5A02G055200.1	brown	c5_107
PB.46622.1	brown	c5_107
TraesCS1B02G435000.1	brown	c5_107
PB.42721.1	brown	c5_107
PB.42528.1	brown	c5_107
PB.38026.1	brown	c5_107
PB.18427.5	brown	c5_107			Z168N vs. Y13N
PB.13922.1	brown	c5_454
TraesCS2A02G277100.1	brown	c5_454
TraesCS2D02G383600.1	brown	c5_454
TraesCS3B02G049900.1	brown	c5_454
PB.39211.7	brown	c5_454
PB.13441.4	brown	c5_454
TraesCS1A02G395300.1	brown	c5_454
TraesCS1B02G352400.1	brown	c5_454
TraesCS3A02G113000.1	brown	c5_454
TraesCS3D02G114900.1	brown	c5_454
TraesCS3B02G130300.1	brown	c5_454
TraesCS3B02G131000.1	brown	c5_454
TraesCS3B02G130400.1	brown	c5_454
TraesCS3A02G113100.1	brown	c5_454
TraesCS7D02G189400.1	brown	c5_454
TraesCS2A02G424900.1	brown	c5_454
TraesCS3A02G274400.1	brown	c5_454
PB.22072.1	brown	c5_454
TraesCS7B02G083500.1	brown	c5_454
TraesCS2B02G594700.1	brown	c5_454
TraesCS4A02G356200.1	brown	c5_454
PB.9403.1	brown	c5_454
PB.266.3	brown	c5_454
PB.8531.1	brown	c5_454
TraesCS1D02G370400.1	brown	c5_454
TraesCS7A02G177700.1	brown	c5_454
TraesCS2A02G156800.2	brown	c5_454
PB.12621.2	brown	c5_454
TraesCS3D02G076000.1	brown	c5_454
TraesCS7D02G179000.1	brown	c5_454
PB.22621.3	brown	c5_454
PB.15795.1	brown	c5_454
PB.37798.2	brown	c5_454
PB.13441.1	brown	c5_454
PB.211.2	brown	c5_454			Z168N vs. Y13N
PB.29719.1	brown	c5_454
PB.39073.1	brown	c5_454
PB.15804.2	brown	c5_454
PB.26131.1	brown	c5_454
TraesCS1A02G145000.1	brown	c5_454
PB.24008.1	brown	c5_454
PB.3685.3	brown	c5_454
PB.48077.1	brown	c5_454
PB.8462.2	brown	c5_454
TraesCS3B02G123000.1	brown	c5_454
TraesCS3A02G219600.1	brown	c5_454
TraesCS3D02G045700.1	brown	c5_454
PB.3685.2	brown	c5_454
TraesCS3D02G114800.1	brown	c5_454
TraesCS2B02G268600.1	brown	c5_454
TraesCS2B02G578800.1	brown	c5_454
TraesCS7A02G145500.1	brown	c5_454
TraesCS4B02G200000.1	brown	c5_454
PB.11782.1	brown	c5_454
PB.16597.1	brown	c5_454
TraesCS3A02G112900.1	brown	c5_454
TraesCS4B02G023600.1	brown	c5_454
TraesCS4A02G371600.1	brown	c5_454
TraesCS4B02G215200.1	brown	c5_454
PB.46509.2	brown	c5_454
TraesCS3B02G308100.1	brown	c5_454
TraesCS3B02G261400.1	brown	c5_454
PB.39024.1	brown	c5_454
PB.30980.3	brown	c5_454
TraesCS1A02G340100.1	brown	c5_454
TraesCS3D02G045800.1	brown	c5_454
TraesCS4D02G206600.1	brown	c5_454
PB.6561.3	brown	c5_454
TraesCS2D02G162600.1	brown	c5_454
TraesCS3B02G131300.1	brown	c5_454
PB.43260.5	brown	c5_454
TraesCS5D02G258900.2	brown	c5_454
TraesCS6D02G393700.1	brown	c5_454
TraesCS7A02G202200.1	brown	c5_454
PB.4182.1	brown	c5_454
PB.50510.1	brown	c5_454
PB.35384.1	brown	c5_454
PB.267.1	brown	c5_454
PB.15682.1	brown	c5_454
PB.41400.1	brown	c5_454
PB.34396.1	brown	c5_454
TraesCS2D02G399000.1	brown	c5_454
TraesCS3A02G274500.1	brown	c5_454
PB.23675.1	brown	c5_454
PB.29280.1	brown	c5_454
PB.13708.6	brown	c5_454
PB.26412.1	brown	c5_454
PB.25519.5	brown	c5_454			Z168N vs. Y13N
PB.12299.1	brown	c5_454
TraesCS5B02G022900.1	brown	c5_454
PB.6513.7	brown	c5_454			Z168N vs. Y13N
PB.13239.1	brown	c5_454
TraesCS3B02G349500.1	brown	c5_454
PB.22738.1	brown	c5_454
PB.50690.3	brown	c5_454
PB.14563.1	brown	c5_454			Z168N vs. Y13N
TraesCS3D02G366600.1	brown	c5_454
TraesCSU02G111300.1	brown	c5_454
PB.22074.1	brown	c5_454
PB.10886.1	brown	c5_454			Z168N vs. Y13N
PB.26606.1	brown	c5_454
PB.42797.2	brown	c5_454
PB.23875.2	brown	c5_454
PB.48934.1	brown	c5_454
PB.19684.2	brown	c5_454
TraesCS2A02G318800.2	brown	c5_454
PB.40077.2	brown	c5_454
PB.22685.4	brown	c5_454
PB.27761.1	brown	c5_454
PB.23138.5	brown	c5_454
PB.21033.2	brown	c5_454
PB.44934.1	brown	c5_454
PB.45039.1	brown	c5_454
PB.35041.1	brown	c5_454
TraesCS7B02G015500.1	brown	c5_454
PB.38385.2	brown	c5_454
PB.19924.2	brown	c5_454
PB.46914.3	brown	c5_454
TraesCS5D02G190600.1	brown	c5_454
PB.21740.3	brown	c5_454
PB.23215.2	brown	c5_454
PB.7835.4	brown	c5_454
PB.35320.2	brown	c5_454
PB.17.2	brown	c5_454
PB.36998.1	brown	c5_454
PB.37655.1	brown	c5_454
PB.45886.4	brown	c5_454
PB.39809.1	brown	c5_454
TraesCS1B02G423600.1	brown	c5_454
PB.28657.2	brown	c5_454
TraesCS1D02G144000.1	brown	c5_454
TraesCS2A02G050600.1	brown	c5_454
TraesCS2D02G398600.1	brown	c5_454
TraesCS1A02G381400.1	brown	c5_454
PB.211.1	brown	c5_454			Z168N vs. Y13N
TraesCS7B02G031000.1	brown	c5_454
PB.26443.2	brown	c5_454
TraesCS7B02G334700.1	brown	c5_454
PB.24754.1	brown	c5_454
TraesCS4B02G038900.1	brown	c5_454
PB.27753.2	brown	c5_454
TraesCS1B02G068200.1	brown	c5_454
TraesCS3D02G046300.1	brown	c5_454
PB.50656.3	brown	c5_454			Z168N vs. Y13N
TraesCS3B02G390700.1	brown	c5_454
TraesCS3D02G046600.1	brown	c5_454
TraesCS7A02G562600.1	brown	c5_454
TraesCS7D02G211100.1	brown	c5_454
PB.30125.15	brown	c5_454			Z168N vs. Y13N
PB.44664.1	brown	c5_454
PB.46769.3	brown	c5_454			Z168N vs. Y13N
TraesCS4D02G145500.1	brown	c5_454
TraesCS4D02G086200.1	brown	c5_454
TraesCS4D02G035800.1	brown	c5_454
TraesCS1B02G178500.1	brown	c5_454
PB.21241.10	brown	c5_454
TraesCS4A02G228900.1	brown	c5_454
TraesCS4B02G380800.1	brown	c5_454
PB.23875.1	brown	c5_454
PB.48046.2	brown	c5_454
TraesCS6B02G020900.1	brown	c5_454
PB.21716.3	brown	c5_454			Z168N vs. Y13N
PB.31836.1	brown	c5_454
TraesCS7B02G083000.1	brown	c5_454
PB.44474.1	brown	c5_454
PB.36836.1	brown	c5_454
PB.17068.1	brown	c5_454
PB.40872.1	brown	c5_454
TraesCS4D02G276500.1	brown	c5_454
PB.9160.3	brown	c5_454
PB.47740.3	brown	c5_454
PB.755.1	brown	c5_454
TraesCSU02G175200.1	brown	c5_454
PB.12378.3	brown	c5_454
PB.869.2	brown	c5_454
TraesCS1B02G169200.1	brown	c5_454
PB.8129.1	brown	c5_454
PB.6979.1	brown	c5_454
PB.39075.2	brown	c5_454
PB.13034.1	brown	c5_454
TraesCS7A02G053100.1	brown	c5_454
PB.29396.2	brown	c5_454
TraesCS7A02G045900.1	brown	c5_454
PB.33138.1	brown	c5_454
PB.30292.1	brown	c5_454
TraesCS2A02G014000.1	brown	c5_454
PB.31423.2	brown	c5_454
PB.15341.2	brown	c5_454
TraesCS3B02G198300.1	brown	c5_454
TraesCS4A02G196900.1	brown	c5_454
TraesCS4D02G194500.1	brown	c5_454
PB.19282.1	brown	c5_454
TraesCS3B02G460000.1	brown	c5_454
TraesCS3B02G561000.1	brown	c5_454
TraesCS3B02G114500.1	brown	c5_454
TraesCS4A02G092800.1	brown	c5_454
PB.46333.1	brown	c5_454
TraesCS7D02G190000.1	brown	c5_454
TraesCS5D02G260500.1	brown	c5_454
PB.35397.2	brown	c5_454
PB.19432.4	brown	c5_454
PB.33784.1	brown	c5_454
PB.16732.4	brown	c5_454
PB.46537.1	brown	c5_454
PB.13888.7	brown	c5_454			Z168N vs. Y13N
PB.17191.1	brown	c5_454
PB.3466.1	brown	c5_454
PB.32406.3	brown	c5_454
PB.46113.1	brown	c5_454
PB.47576.1	brown	c5_454
TraesCS3D02G046800.1	brown	c5_454
PB.39970.2	brown	c5_454
PB.39961.2	brown	c5_454
TraesCS3B02G063500.1	brown	c5_454
TraesCS3A02G088100.1	brown	c5_454
PB.48091.1	brown	c5_454
TraesCS3D02G033100.1	brown	c5_454
PB.4844.5	brown	c5_454			Z168N vs. Y13N
PB.17743.1	brown	c5_454
PB.26932.2	brown	c5_454
TraesCS1A02G248000.1	brown	c5_454
PB.23045.1	brown	c5_454
PB.35504.2	brown	c5_454
PB.5383.1	brown	c5_454
TraesCS2A02G066800.1	brown	c5_454
PB.28197.1	brown	c5_454
TraesCS1A02G400700.1	brown	c5_454
TraesCS2D02G353100.1	brown	c5_454			Z168N vs. Y13N
PB.35397.1	brown	c5_454
PB.49473.1	brown	c5_454
PB.32973.1	brown	c5_454
PB.50803.1	brown	c5_454
TraesCS1B02G283100.1	brown	c5_454
TraesCS2B02G583300.4	brown	c5_454
PB.45638.1	brown	c5_454
TraesCS1D02G165100.4	brown	c5_454
TraesCS6B02G012800.1	brown	c5_454
PB.4386.4	brown	c5_454
TraesCS5B02G067100.1	brown	c5_454
PB.19792.1	brown	c5_454
PB.5244.1	brown	c5_454
TraesCS2B02G396500.1	brown	c5_454
PB.10506.6	brown	c5_454			Z168N vs. Y13N
TraesCS6A02G302100.2	brown	c5_454
PB.49884.1	brown	c5_454
PB.35508.1	brown	c5_454
PB.31710.1	brown	c5_454
PB.16199.1	brown	c5_454
PB.13924.2	brown	c5_454
TraesCS3D02G115000.1	brown	c5_454
TraesCS3D02G115300.1	brown	c5_454
TraesCS3D02G273600.1	brown	c5_454
TraesCS3D02G351900.1	brown	c5_454
TraesCS4D02G212300.1	brown	c5_454
TraesCS6D02G364400.1	brown	c5_454
TraesCS7A02G188300.1	brown	c5_454
TraesCS7A02G232500.1	brown	c5_454
TraesCS7D02G068800.1	brown	c5_454
TraesCS7D02G232600.1	brown	c5_454
TraesCSU02G116400.1	brown	c5_454
PB.9977.2	brown	c5_454
TraesCS2B02G404400.1	brown	c5_454
TraesCS2D02G034400.1	brown	c5_454
TraesCS2D02G350800.1	brown	c5_454
TraesCS2D02G391600.1	brown	c5_454
TraesCS3D02G115100.1	brown	c5_454
TraesCS4A02G092700.1	brown	c5_454
TraesCS4B02G112700.1	brown	c5_454
TraesCS4B02G116200.1	brown	c5_454
TraesCS4D02G021200.1	brown	c5_454
TraesCS5A02G296200.1	brown	c5_454
TraesCS5B02G257000.1	brown	c5_454
TraesCS5D02G266000.1	brown	c5_454
TraesCS5D02G434100.1	brown	c5_454
TraesCS6B02G247200.1	brown	c5_454
TraesCS6D02G209600.1	brown	c5_454
TraesCS6D02G293800.1	brown	c5_454
TraesCS7A02G257100.1	brown	c5_454
TraesCS7A02G330300.1	brown	c5_454
TraesCS7B02G064100.1	brown	c5_454
TraesCS7B02G149200.1	brown	c5_454
TraesCS7B02G388700.3	brown	c5_454
TraesCSU02G131300.1	brown	c5_454
TraesCSU02G138000.1	brown	c5_454
TraesCS4B02G211900.1	brown	c5_454
TraesCS5D02G337200.1	brown	c5_454
TraesCS7B02G094500.1	brown	c5_454
PB.19432.3	brown	c5_454
PB.32489.1	brown	c5_454
PB.35460.3	brown	c5_454
PB.4035.2	brown	c5_454
PB.45475.7	brown	c5_454
PB.46176.1	brown	c5_454
PB.47334.2	brown	c5_454
PB.9684.1	brown	c5_454
TraesCS2D02G420800.1	brown	c5_454
TraesCS4B02G205700.1	brown	c5_454
TraesCS4B02G366400.1	brown	c5_454
TraesCS4D02G134900.1	brown	c5_454
TraesCS4D02G209700.1	brown	c5_454
TraesCS4D02G213100.1	brown	c5_454
TraesCS4D02G213300.1	brown	c5_454
TraesCS5B02G097600.1	brown	c5_454
TraesCS5B02G428000.1	brown	c5_454
TraesCS6B02G065800.1	brown	c5_454
TraesCS6B02G065856.1	brown	c5_454			Z168N vs. Y13N
TraesCS6B02G174500.1	brown	c5_454
TraesCS7A02G477300.1	brown	c5_454
TraesCS7B02G064000.1	brown	c5_454
TraesCS7D02G353800.1	brown	c5_454
TraesCS6A02G109000.1	brown	c5_454
PB.21241.7	brown	c5_454
PB.28147.1	brown	c5_454
PB.33922.2	brown	c5_454
TraesCS1A02G036200.1	brown	c5_454
TraesCS5D02G158300.1	brown	c5_454
PB.25314.1	brown	c5_454
TraesCS4D02G087800.1	brown	c5_454
PB.7.1	brown	c5_454
TraesCS5B02G563900.2	brown	c5_454
TraesCS6B02G187500.1	brown	c5_454
TraesCS3B02G452700.1	brown	c5_454
TraesCS7D02G078500.1	brown	c5_454
TraesCS6B02G248400.1	brown	c5_454
TraesCS4D02G091600.1	brown	c5_454
TraesCS7B02G492200.1	brown	c5_454
PB.48845.5	brown	c5_454
TraesCS3D02G393600.1	brown	c5_454
PB.28373.1	brown	c5_455
PB.49804.2	brown	c5_455
PB.15855.1	brown	c5_455
PB.47320.3	brown	c5_455
PB.7616.3	brown	c5_455
TraesCS5D02G105900.1	brown	c5_455
PB.33645.2	brown	c5_455
TraesCS7A02G334200.1	brown	c5_455
TraesCS4B02G059200.1	brown	c5_455
TraesCS7D02G326400.2	brown	c5_455
TraesCS3D02G295200.1	brown	c5_455
PB.16303.1	brown	c5_455
PB.21757.12	brown	c5_455			Z168N vs. Y13N
TraesCS3B02G337600.1	brown	c5_455
TraesCS6D02G295900.1	brown	c5_455
PB.14385.1	brown	c5_455
TraesCS6D02G352700.1	brown	c5_455
PB.32603.2	brown	c5_455
TraesCS6D02G104000.1	brown	c5_455
TraesCS5D02G119200.1	brown	c5_455			Z168N vs. Y13N
TraesCS7A02G182600.1	brown	c5_455
PB.50509.1	brown	c5_456
PB.18463.3	brown	c5_456
PB.36574.1	brown	c5_456
PB.23476.1	brown	c5_456
PB.1341.6	brown	c5_456
TraesCS2B02G237100.1	brown	c5_456
TraesCS7D02G179600.1	brown	c5_456
PB.17893.4	brown	c5_456
PB.16177.1	brown	c5_456
TraesCS2D02G274900.1	brown	c5_456
TraesCS1D02G053500.1	brown	c5_456
TraesCS5A02G257700.1	brown	c5_456
PB.16103.1	brown	c5_456
PB.13922.2	brown	c5_456
PB.29170.1	brown	c5_456
PB.49999.1	brown	c5_456
TraesCS6A02G123300.1	brown	c5_456
TraesCS2D02G469400.1	brown	c5_456
TraesCS7B02G373800.1	brown	c5_456
TraesCS1A02G375600.1	brown	c5_456			Z168N vs. Y13N
TraesCS6B02G456700.1	brown	c5_456
TraesCS2A02G401600.1	brown	c5_456
PB.11040.1	brown	c5_456
PB.18039.1	brown	c5_456
TraesCS1B02G403900.1	brown	c5_456
TraesCS2A02G291500.1	brown	c5_456
TraesCS5A02G384100.1	brown	c5_456
PB.21623.1	brown	c5_456
TraesCS1A02G164900.1	brown	c5_456
PB.42380.5	brown	c5_456
TraesCS6A02G266000.1	brown	c5_456
TraesCS7D02G227200.1	brown	c5_456
PB.1832.5	brown	c5_456
TraesCS7B02G083100.1	brown	c5_456
PB.15029.1	brown	c5_456
PB.34354.1	brown	c5_456
PB.20633.1	brown	c5_456
TraesCS1B02G446900.1	brown	c5_456
PB.26217.1	brown	c5_456
PB.14003.1	brown	c5_456
PB.33590.1	brown	c5_456
TraesCS4D02G066600.1	brown	c5_456
PB.47095.1	brown	c5_456
PB.4987.2	brown	c5_456
TraesCS6D02G123700.1	brown	c5_456
PB.13927.1	brown	c5_456
PB.20143.2	brown	c5_456
PB.24491.3	brown	c5_456
PB.14368.7	brown	c5_456
TraesCS4D02G323000.1	brown	c5_456
PB.26443.3	brown	c5_456
PB.34469.1	brown	c5_456
TraesCS1A02G282900.1	brown	c5_456
PB.32058.4	brown	c5_456
TraesCS2A02G417900.3	brown	c5_456
PB.36219.2	brown	c5_456
PB.42348.2	brown	c5_456
TraesCS4A02G128300.1	brown	c5_456
TraesCS1D02G013100.3	brown	c5_456
PB.28175.1	brown	c5_456
PB.40050.1	brown	c5_456
TraesCS5D02G395300.1	brown	c5_456
TraesCS7B02G200400.1	brown	c5_456
TraesCS7B02G226100.1	brown	c5_456
PB.41200.1	brown	c5_456
TraesCS7D02G346000.1	brown	c5_456
PB.3938.3	brown	c5_456			Z168N vs. Y13N
PB.5673.3	brown	c5_456
PB.339.3	brown	c5_456
PB.2704.1	brown	c5_461
TraesCS1A02G108500.1	brown	c5_461
PB.27735.1	brown	c5_461
PB.45695.3	brown	c5_461
TraesCS1D02G121000.1	brown	c5_461
PB.28356.3	brown	c5_461
TraesCS6A02G146400.1	brown	c5_461
TraesCS3B02G390800.1	brown	c5_461
PB.23812.1	brown	c5_461
TraesCS6A02G316200.1	brown	c5_461
TraesCS2B02G049000.1	brown	c5_461
PB.40104.3	brown	c5_461
TraesCS1A02G172600.1	brown	c5_461
PB.21508.2	brown	c5_461
TraesCS5A02G375000.1	brown	c5_461
PB.39074.1	brown	c5_461
TraesCS4A02G110600.1	brown	c5_461
PB.11259.10	brown	c5_461			Z168N vs. Y13N
TraesCS3B02G610000.1	brown	c5_461
TraesCS5A02G251000.1	brown	c5_461
TraesCS1D02G382900.1	brown	c5_461			Z168N vs. Y13N
TraesCS7B02G067200.1	brown	c5_461
PB.50686.1	brown	c5_461
PB.41923.2	brown	c5_461
PB.2160.2	brown	c5_461
PB.30006.1	brown	c5_461			Z168N vs. Y13N
PB.39444.1	brown	c5_461
PB.2199.1	brown	c5_461
PB.18195.1	brown	c5_461
TraesCS6D02G063300.1	brown	c5_461
TraesCS2D02G378800.1	brown	c5_461
PB.50700.1	brown	c5_461			Z168N vs. Y13N
PB.21814.5	brown	c5_461
TraesCS7B02G009400.2	brown	c5_461
PB.5976.1	brown	c5_461
TraesCS5B02G272900.1	brown	c5_461
TraesCSU02G093700.1	brown	c5_461
PB.35318.2	brown	c5_461			Z168N vs. Y13N
TraesCS6D02G135600.1	brown	c5_461
TraesCS5D02G191700.1	brown	c5_461
PB.50659.1	brown	c5_461
TraesCS6D02G293900.1	brown	c5_461
PB.37121.1	brown	c5_461
PB.3220.1	brown	c5_461
PB.47743.1	brown	c5_461
PB.46912.1	brown	c5_461
PB.44294.1	brown	c5_463			Z168N vs. Y13N
PB.38043.1	brown	c5_463
TraesCS7B02G419800.1	brown	c5_463
PB.11265.3	brown	c5_463
PB.13865.3	brown	c5_463
PB.22323.1	brown	c5_463
PB.38054.2	brown	c5_463
PB.7318.1	brown	c5_463
PB.17190.2	brown	c5_463
PB.35248.1	brown	c5_463
TraesCS4A02G116800.1	brown	c5_463
TraesCS1A02G071600.1	brown	c5_463
TraesCS3A02G211200.1	brown	c5_463
TraesCS4A02G165900.1	brown	c5_463
PB.4103.4	brown	c5_463
PB.50771.1	brown	c5_463
PB.19131.1	brown	c5_463
PB.4904.1	brown	c5_463
PB.13538.2	brown	c5_463
PB.5245.2	brown	c5_463
PB.38909.141	brown	c5_463
TraesCS6D02G322300.1	brown	c5_463
PB.12484.6	brown	c5_463			Z168N vs. Y13N
TraesCS2B02G424400.1	brown	c5_463
TraesCS4D02G251700.1	brown	c5_463
PB.29553.1	brown	c5_463
PB.17821.5	brown	c5_463			Z168N vs. Y13N
PB.29751.4	brown	c5_463			Z168N vs. Y13N
PB.50327.1	brown	c5_463
TraesCS2A02G163200.1	brown	c5_463
TraesCS4D02G189200.1	brown	c5_463
TraesCS6D02G356100.2	brown	c5_463
TraesCS2A02G396100.1	brown	c5_463
TraesCS7A02G338800.1	brown	c5_463
TraesCS4D02G145600.1	brown	c5_463
TraesCS5D02G219500.1	brown	c5_463
TraesCS7B02G347100.1	brown	c5_463
TraesCS5A02G273200.1	brown	c5_463
TraesCS2A02G073700.1	brown	c5_463
TraesCS7A02G419800.1	brown	c5_490
TraesCS4A02G104000.1	brown	c5_490
PB.39398.1	brown	c5_490
TraesCS3A02G509300.1	brown	c5_490
PB.37462.2	brown	c5_490
TraesCS2A02G504900.1	brown	c5_490
PB.50460.55	brown	c5_490
PB.39520.1	brown	c5_490
PB.7367.1	brown	c5_490
PB.40123.3	brown	c5_490
PB.27958.1	brown	c5_490
PB.24746.1	brown	c5_490
TraesCS6B02G068400.1	brown	c5_490
PB.21814.1	brown	c5_490
PB.30407.2	brown	c5_490
PB.45885.1	brown	c5_490
TraesCS5B02G267900.1	brown	c5_490
TraesCS5B02G503400.1	brown	c5_490
TraesCS3B02G506100.1	brown	c5_490
PB.1445.2	brown	c5_490
PB.46524.2	brown	c5_490
PB.45705.3	brown	c5_490
TraesCS2B02G424300.1	brown	c5_490
TraesCS2B02G430500.1	brown	c5_490
PB.36553.2	brown	c5_490
TraesCS4B02G011100.1	brown	c5_490
PB.36806.1	brown	c5_490
PB.10638.2	brown	c5_490
TraesCS1B02G361800.1	brown	c5_490
PB.48067.3	brown	c5_490
PB.24227.2	brown	c5_490			Z168N vs. Y13N
PB.9605.1	brown	c5_490
TraesCS1B02G168200.1	brown	c5_490
TraesCS1D02G232100.1	brown	c5_490
TraesCS7D02G179100.1	brown	c5_490
TraesCS5A02G520200.1	brown	c5_490
PB.38908.3	brown	c5_490
PB.42419.1	brown	c5_490
TraesCS6D02G196300.1	brown	c5_490
PB.26059.3	brown	c5_490			Z168N vs. Y13N
TraesCS1D02G370400.1	brown	c5_975
PB.27586.3	brown	c5_975
PB.28836.2	brown	c5_975
PB.4428.6	brown	c5_975
PB.10876.1	brown	c5_975
TraesCS5B02G022900.1	brown	c5_975
PB.6513.7	brown	c5_975			Z168N vs. Y13N
TraesCS3D02G366600.1	brown	c5_975
PB.48934.1	brown	c5_975
TraesCS2A02G318800.2	brown	c5_975
PB.21033.2	brown	c5_975
PB.44934.1	brown	c5_975
PB.45039.1	brown	c5_975
PB.38385.2	brown	c5_975
PB.21740.3	brown	c5_975
PB.30125.15	brown	c5_975			Z168N vs. Y13N
PB.46769.3	brown	c5_975			Z168N vs. Y13N
TraesCSU02G175200.1	brown	c5_975
PB.13034.1	brown	c5_975
TraesCS4D02G194500.1	brown	c5_975
PB.46333.1	brown	c5_975
PB.19432.4	brown	c5_975
PB.17743.1	brown	c5_975
PB.32973.1	brown	c5_975
TraesCS2B02G404400.1	brown	c5_975
PB.32489.1	brown	c5_975
PB.35460.3	brown	c5_975
PB.47334.2	brown	c5_975
PB.9684.1	brown	c5_975
TraesCS5B02G428000.1	brown	c5_975
TraesCS6B02G065800.1	brown	c5_975
PB.28147.1	brown	c5_975
PB.2704.1	brown	c5_1035
TraesCS1A02G108500.1	brown	c5_1035
PB.27735.1	brown	c5_1035
PB.45695.3	brown	c5_1035
TraesCS1D02G121000.1	brown	c5_1035
PB.28356.3	brown	c5_1035
TraesCS6A02G146400.1	brown	c5_1035
TraesCS3B02G390800.1	brown	c5_1035
PB.23812.1	brown	c5_1035
TraesCS6A02G316200.1	brown	c5_1035
TraesCS2B02G049000.1	brown	c5_1035
PB.40104.3	brown	c5_1035
TraesCS1A02G172600.1	brown	c5_1035
PB.21508.2	brown	c5_1035
TraesCS5A02G375000.1	brown	c5_1035
PB.39074.1	brown	c5_1035
TraesCS4A02G110600.1	brown	c5_1035
TraesCS3B02G610000.1	brown	c5_1035
TraesCS5A02G251000.1	brown	c5_1035
TraesCS7B02G067200.1	brown	c5_1035
PB.50686.1	brown	c5_1035
PB.2160.2	brown	c5_1035
PB.39444.1	brown	c5_1035
PB.2199.1	brown	c5_1035
PB.18195.1	brown	c5_1035
TraesCS6D02G063300.1	brown	c5_1035
PB.50700.1	brown	c5_1035			Z168N vs. Y13N
TraesCS7B02G009400.2	brown	c5_1035
PB.5976.1	brown	c5_1035
TraesCS5B02G272900.1	brown	c5_1035
PB.35318.2	brown	c5_1035			Z168N vs. Y13N
TraesCS6D02G135600.1	brown	c5_1035
TraesCS5D02G191700.1	brown	c5_1035
PB.50659.1	brown	c5_1035
TraesCS6D02G293900.1	brown	c5_1035
PB.37121.1	brown	c5_1035
TraesCS4A02G104000.1	brown	c5_1167
PB.39398.1	brown	c5_1167
TraesCS3A02G509300.1	brown	c5_1167
PB.37462.2	brown	c5_1167
TraesCS2A02G504900.1	brown	c5_1167
PB.50460.55	brown	c5_1167
PB.40123.3	brown	c5_1167
PB.24746.1	brown	c5_1167
PB.21814.1	brown	c5_1167
PB.30407.2	brown	c5_1167
PB.45885.1	brown	c5_1167
TraesCS5B02G267900.1	brown	c5_1167
TraesCS5B02G503400.1	brown	c5_1167
TraesCS3B02G506100.1	brown	c5_1167
PB.1445.2	brown	c5_1167
PB.46524.2	brown	c5_1167
PB.45705.3	brown	c5_1167
PB.36553.2	brown	c5_1167
PB.48067.3	brown	c5_1167
PB.24227.2	brown	c5_1167			Z168N vs. Y13N
TraesCS1B02G168200.1	brown	c5_1167
TraesCS1D02G232100.1	brown	c5_1167
PB.42419.1	brown	c5_1167
TraesCS6D02G196300.1	brown	c5_1167
PB.26059.3	brown	c5_1167			Z168N vs. Y13N
PB.2006.2	brown	c5_1496			Z168N vs. Y13N
PB.13922.1	brown	c5_1496
TraesCS2A02G277100.1	brown	c5_1496
TraesCS2D02G383600.1	brown	c5_1496
PB.13441.4	brown	c5_1496
TraesCS1A02G395300.1	brown	c5_1496
TraesCS3B02G130300.1	brown	c5_1496
TraesCS3A02G113100.1	brown	c5_1496
TraesCS3A02G274400.1	brown	c5_1496
PB.22072.1	brown	c5_1496
TraesCS7B02G083500.1	brown	c5_1496
PB.266.3	brown	c5_1496
TraesCS3D02G076000.1	brown	c5_1496
PB.37798.2	brown	c5_1496
PB.29719.1	brown	c5_1496
TraesCS1A02G145000.1	brown	c5_1496
PB.3685.3	brown	c5_1496
TraesCS2A02G386800.1	brown	c5_1496
TraesCS3D02G114800.1	brown	c5_1496
TraesCS2B02G578800.1	brown	c5_1496
TraesCS7A02G145500.1	brown	c5_1496
TraesCS4B02G200000.1	brown	c5_1496
TraesCS4A02G371600.1	brown	c5_1496
TraesCS3B02G261400.1	brown	c5_1496
TraesCS3D02G045800.1	brown	c5_1496
PB.43260.5	brown	c5_1496
TraesCS7A02G202200.1	brown	c5_1496
PB.35384.1	brown	c5_1496
PB.41400.1	brown	c5_1496
TraesCSU02G111300.1	brown	c5_1496
PB.22074.1	brown	c5_1496
PB.27761.1	brown	c5_1496
PB.46914.3	brown	c5_1496
PB.45672.3	brown	c5_1496
PB.23215.2	brown	c5_1496
PB.7835.4	brown	c5_1496
PB.17.2	brown	c5_1496
PB.39809.1	brown	c5_1496
TraesCS1D02G144000.1	brown	c5_1496
TraesCS7B02G334700.1	brown	c5_1496
PB.24754.1	brown	c5_1496
TraesCS4B02G038900.1	brown	c5_1496
TraesCS4D02G086200.1	brown	c5_1496
PB.23875.1	brown	c5_1496
PB.48046.2	brown	c5_1496
TraesCS6B02G020900.1	brown	c5_1496
PB.755.1	brown	c5_1496
PB.39075.2	brown	c5_1496
PB.15341.2	brown	c5_1496
TraesCS7D02G190000.1	brown	c5_1496
PB.32406.3	brown	c5_1496
TraesCS1A02G248000.1	brown	c5_1496
PB.50803.1	brown	c5_1496
TraesCS1B02G283100.1	brown	c5_1496
TraesCS3D02G273600.1	brown	c5_1496
TraesCS6D02G364400.1	brown	c5_1496
TraesCS7D02G068800.1	brown	c5_1496
TraesCS7D02G232600.1	brown	c5_1496
TraesCS2D02G350800.1	brown	c5_1496
TraesCS4B02G112700.1	brown	c5_1496
TraesCS4D02G021200.1	brown	c5_1496
TraesCS5B02G257000.1	brown	c5_1496
TraesCS5D02G266000.1	brown	c5_1496
TraesCS7B02G149200.1	brown	c5_1496
TraesCS7B02G388700.3	brown	c5_1496
TraesCSU02G138000.1	brown	c5_1496
TraesCS4B02G211900.1	brown	c5_1496
TraesCS4B02G366400.1	brown	c5_1496
TraesCS4D02G209700.1	brown	c5_1496
TraesCS4D02G213300.1	brown	c5_1496
PB.21241.7	brown	c5_1496
PB.13441.2	brown	c5_1614
PB.19049.2	brown	c5_1614
PB.36406.6	brown	c5_1614
PB.47771.1	brown	c5_1614
TraesCS2A02G109100.1	brown	c5_1614
TraesCS2D02G289100.1	brown	c5_1614
TraesCS1B02G294300.1	brown	c5_1614
PB.36068.2	brown	c5_1614			Z168N vs. Y13N
PB.18208.1	brown	c5_1614
TraesCS1D02G187700.1	brown	c5_1614
TraesCS1B02G291800.1	brown	c5_1614
TraesCS4B02G087500.1	brown	c5_1614
PB.12661.2	brown	c5_1614
TraesCS4B02G211600.1	brown	c5_1614
PB.2964.2	brown	c5_1614
TraesCS5A02G153400.1	brown	c5_1614
TraesCS2A02G472700.1	brown	c5_1614
TraesCS3B02G130900.1	brown	c5_1614
TraesCS5D02G280700.1	brown	c5_1614
TraesCS5A02G426100.1	brown	c5_1614
TraesCS3B02G315900.1	brown	c5_1614
PB.49131.2		c5_102
PB.40178.1		c5_454			Z168N vs. Y13N
TraesCS3D02G294300.1		c5_454
PB.264.1		c5_454
TraesCS6B02G377100.1		c5_463
TraesCS2B02G223500.1		c5_102
TraesCS5D02G037500.1		c5_102
TraesCS6A02G040900.2		c5_102
TraesCS2A02G561100.1		c5_102
PB.8479.1		c5_102
PB.24791.1		c5_102
PB.29193.3		c5_102
TraesCS3D02G031800.1		c5_102
PB.438.1		c5_107
PB.26574.5		c5_456
PB.14796.20		c5_463
PB.10143.1		c5_7
PB.46563.1		c5_7
PB.9814.2		c5_7
PB.2921.2		c5_7
TraesCS6B02G027300.1		c5_7
TraesCS6B02G075500.1		c5_7
PB.24039.1		c5_7
PB.41206.1		c5_7
PB.2108.1		c5_7
PB.33851.1		c5_7
PB.19806.1		c5_7
PB.3073.3		c5_7
PB.4159.1		c5_7
PB.42837.1		c5_7
PB.28193.2		c5_7
PB.48652.1		c5_7
TraesCS6A02G018100.1		c5_7
PB.47703.1		c5_7
PB.24786.1		c5_7
TraesCS6A02G018300.1		c5_7
PB.22689.1		c5_7
PB.8461.2		c5_7
TraesCS4A02G481200.1		c5_7
TraesCS2B02G083900.2		c5_7
TraesCS7A02G013100.1		c5_7
TraesCS3B02G257300.1		c5_7
PB.17401.1		c5_7
PB.17785.1		c5_7
PB.28193.1		c5_7
PB.23176.1		c5_7
TraesCS2B02G278700.2		c5_7
PB.40284.1		c5_7
PB.40903.1		c5_7
PB.3223.1		c5_7
PB.30578.1		c5_7
PB.9155.5		c5_7
PB.38476.1		c5_7
TraesCS7D02G398300.1		c5_7
TraesCS2A02G442400.1		c5_7
PB.16259.1		c5_7
TraesCS7D02G022100.1		c5_7
PB.9443.1		c5_7
TraesCS2B02G085100.1		c5_7
TraesCS3D02G233200.1		c5_7
PB.39415.2		c5_7
PB.36012.2		c5_7
TraesCS2B02G055500.1		c5_7
PB.9378.1		c5_7
TraesCS6A02G043400.1		c5_7
TraesCS7B02G193400.1		c5_7
PB.33567.1		c5_7
TraesCS5D02G279900.1		c5_7
PB.21646.1		c5_7
PB.20558.1		c5_7
TraesCS2D02G486100.1		c5_7
PB.46536.1		c5_7
PB.495.1		c5_7
TraesCS3B02G107700.1		c5_7
TraesCS7A02G559100.1		c5_7
TraesCS7B02G155400.1		c5_7
PB.42271.1		c5_7
TraesCS2B02G075300.1		c5_7
TraesCS5B02G256700.1		c5_7
TraesCS6A02G152300.1		c5_7
TraesCS3B02G497800.1		c5_7
TraesCS5B02G345400.1		c5_7
TraesCS4A02G462000.1		c5_7
TraesCS4A02G345400.1		c5_7
TraesCS7D02G015200.2		c5_7
PB.1295.1		c5_29
TraesCS6A02G178500.1		c5_29
TraesCS5D02G045700.1		c5_29
TraesCS7D02G230400.1		c5_29
TraesCS3B02G595900.1		c5_29
TraesCS3B02G545300.1		c5_29
PB.10688.1		c5_29
PB.13221.2		c5_29
PB.16926.2		c5_29
PB.12548.3		c5_29
PB.7756.2		c5_29
PB.38909.41		c5_29
TraesCS1A02G076100.1		c5_29
PB.46455.3		c5_29
TraesCS3B02G609800.1		c5_29
PB.5477.5		c5_29			Z168N vs. Y13N
PB.9723.1		c5_29
TraesCS5D02G208300.2		c5_29
PB.12746.4		c5_29			Z168N vs. Y13N
TraesCS2D02G147900.1		c5_29
PB.18979.1		c5_29
PB.37951.3		c5_29
TraesCSU02G036600.1		c5_29
PB.6974.1		c5_29
TraesCS6D02G333000.1		c5_29
TraesCS7D02G317200.1		c5_29
TraesCS1B02G086600.2		c5_29			Z168N vs. Y13N
PB.24686.1		c5_29
PB.7955.1		c5_29			Z168N vs. Y13N
PB.9967.9		c5_29
TraesCS7B02G154800.4		c5_29
TraesCS5D02G529600.1		c5_29
PB.16061.1		c5_29			Z168N vs. Y13N
TraesCS3A02G129600.1		c5_29
TraesCS7B02G041600.1		c5_29
PB.32369.1		c5_29
PB.30652.1		c5_29
TraesCS3D02G224600.1		c5_29
PB.43409.1		c5_29
TraesCS6A02G134500.1		c5_29
TraesCSU02G267761.1		c5_29
PB.38848.1		c5_29
TraesCS2A02G352000.1		c5_29
TraesCS1B02G223100.1		c5_29
TraesCS4A02G258800.2		c5_29
TraesCS3A02G165200.1		c5_29
TraesCS6D02G241400.1		c5_29
PB.34714.1		c5_29
PB.3168.3		c5_29
TraesCS5A02G356900.1		c5_102
TraesCS7B02G035400.1		c5_102
PB.30618.3		c5_102			Z168N vs. Y13N
TraesCS6D02G034400.1		c5_102
TraesCS6D02G010400.1		c5_102
PB.39902.2		c5_102
TraesCS1B02G162100.1		c5_102
PB.2855.1		c5_102
TraesCS3D02G071800.1		c5_102
PB.25305.1		c5_102
TraesCS1B02G357600.1		c5_102
PB.25216.2		c5_102
TraesCS7D02G428200.1		c5_102
PB.38909.145		c5_102
PB.36885.2		c5_102
TraesCS7D02G020100.1		c5_102
PB.39331.1		c5_102
PB.31063.1		c5_102
PB.6738.1		c5_102
TraesCS1D02G447300.1		c5_102
PB.8549.1		c5_102
PB.32610.1		c5_102
TraesCS1B02G298400.2		c5_102
TraesCS5D02G452500.1		c5_102
TraesCS3A02G535700.1		c5_102
TraesCS5A02G125500.1		c5_102
TraesCS1D02G147100.2		c5_102
TraesCS3D02G545000.1		c5_102
TraesCS4B02G220100.1		c5_102
TraesCS3A02G411300.1		c5_102
PB.423.1		c5_102
PB.30328.2		c5_102
PB.35099.1		c5_102			Z168N vs. Y13N
PB.27417.1		c5_102
PB.9855.1		c5_102
PB.49711.1		c5_102
TraesCSU02G175900.1		c5_102
TraesCS7B02G231000.1		c5_102
PB.46550.3		c5_102
TraesCS2A02G051600.1		c5_102
TraesCS2D02G211800.1		c5_102
PB.47714.1		c5_102
TraesCS1D02G226000.1		c5_102
TraesCS3D02G245500.2		c5_102
TraesCS2D02G489900.1		c5_102
TraesCS7A02G337200.1		c5_102
PB.10453.5		c5_102			Z168N vs. Y13N
PB.25607.1		c5_102
PB.44056.1		c5_102
PB.47517.3		c5_102			Z168N vs. Y13N
PB.37893.1		c5_102			Z168N vs. Y13N
PB.31658.1		c5_102
TraesCS2A02G525000.1		c5_102
TraesCS2D02G300100.1		c5_102
TraesCS3D02G393700.1		c5_102
TraesCS5A02G229900.1		c5_102
TraesCS5D02G302000.1		c5_102
TraesCS1B02G376200.1		c5_102
PB.24814.2		c5_102
TraesCS1D02G369500.1		c5_102
TraesCSU02G149938.1		c5_102
TraesCS6B02G408000.1		c5_102
PB.44927.1		c5_102
TraesCS4A02G460800.1		c5_102
TraesCS2D02G125900.1		c5_102
TraesCS7B02G384700.1		c5_102
TraesCS3A02G399600.1		c5_102
PB.43444.1		c5_102
PB.32417.2		c5_102
TraesCS4A02G482100.1		c5_102
TraesCSU02G149400.1		c5_102
PB.22898.1		c5_102
TraesCS1A02G394800.1		c5_102
PB.11255.1		c5_102
TraesCS2B02G358900.1		c5_102
TraesCS6B02G338900.1		c5_102
TraesCS5B02G274800.1		c5_102
PB.45442.2		c5_102
PB.43464.6		c5_102			Z168N vs. Y13N
TraesCS6A02G040900.3		c5_102
PB.34297.1		c5_102
TraesCS3B02G161000.1		c5_102
TraesCS5B02G002700.1		c5_102
TraesCS2B02G178400.2		c5_102
PB.8082.5		c5_102			Z168N vs. Y13N
PB.2667.5		c5_102			Z168N vs. Y13N
TraesCSU02G009400.1		c5_102
PB.45797.1		c5_102
PB.30094.1		c5_102
PB.35073.1		c5_102
TraesCS2D02G287000.1		c5_102
TraesCS1A02G301400.1		c5_102
TraesCS3D02G191300.1		c5_102
PB.45607.1		c5_102
PB.42390.1		c5_102
TraesCS1B02G277000.1		c5_102
PB.38909.173		c5_102
PB.4243.2		c5_102
TraesCS1A02G212000.1		c5_102
PB.29412.2		c5_102
PB.31085.2		c5_102
TraesCS5D02G224000.1		c5_102
TraesCS2D02G155000.1		c5_102
TraesCS7A02G147200.1		c5_102
TraesCS4D02G326100.1		c5_102
PB.6064.3		c5_102
TraesCS5B02G430100.1		c5_102
TraesCS3A02G033900.1		c5_102
TraesCS6B02G097800.1		c5_102
TraesCS5B02G082100.1		c5_102
TraesCS2D02G484000.1		c5_102
PB.4498.11		c5_102
PB.5576.6		c5_102
TraesCS5A02G154500.1		c5_102
PB.46889.10		c5_102
PB.23621.1		c5_102
TraesCS1D02G384000.1		c5_102
TraesCS4D02G356200.1		c5_102
TraesCS3B02G063200.1		c5_102
TraesCS2A02G461200.1		c5_102
PB.45331.1		c5_102
PB.11644.8		c5_102			Z168N vs. Y13N
TraesCS2D02G228500.1		c5_102
PB.46254.2		c5_102
PB.27159.2		c5_102
PB.44646.1		c5_102
PB.1100.1		c5_102
TraesCS2A02G577200.2		c5_102
TraesCS7B02G327300.1		c5_102
PB.19613.1		c5_102
TraesCS7D02G042400.1		c5_102
PB.16054.4		c5_102
PB.813.2		c5_102
TraesCS7B02G377900.1		c5_102
TraesCS5A02G024700.1		c5_102
TraesCS1A02G189500.1		c5_102
TraesCS4D02G000900.1		c5_102
TraesCS2A02G362700.1		c5_102
PB.10629.2		c5_102
PB.17757.1		c5_102
TraesCS6B02G099800.1		c5_102
PB.30246.1		c5_102
TraesCS1A02G219200.1		c5_102
PB.21241.8		c5_102
TraesCS2D02G090400.1		c5_102
PB.14610.2		c5_102
PB.1820.1		c5_102
PB.22988.1		c5_102
TraesCS3A02G354700.1		c5_102
PB.45456.1		c5_102
PB.27540.1		c5_102
PB.38110.2		c5_102
TraesCS7D02G457200.1		c5_102
PB.11278.2		c5_102
TraesCS7B02G232400.1		c5_102
TraesCS6A02G239800.1		c5_102
PB.15876.6		c5_102
PB.16901.1		c5_102
TraesCS2B02G098400.1		c5_102
TraesCS6B02G383800.1		c5_102
TraesCS2B02G453800.1		c5_102
PB.28916.1		c5_102
PB.7982.1		c5_102
PB.40221.1		c5_102
TraesCS6A02G295000.1		c5_102
PB.31131.4		c5_102
PB.15947.2		c5_102
PB.11024.1		c5_102
PB.9740.2		c5_102
TraesCS6A02G155800.1		c5_102
TraesCS1B02G245200.1		c5_102
PB.3382.2		c5_102			Z168N vs. Y13N
PB.39921.1		c5_102
TraesCS2A02G446800.1		c5_102
TraesCS6A02G099700.1		c5_102
TraesCS4B02G030900.1		c5_102
TraesCS1B02G386600.1		c5_102
PB.23377.3		c5_102
TraesCS6D02G046400.1		c5_102
TraesCS2D02G343600.1		c5_102
PB.4105.2		c5_102
PB.45526.2		c5_102			Z168N vs. Y13N
PB.29639.1		c5_102
TraesCS4A02G226700.1		c5_102
TraesCS5B02G307600.1		c5_102
TraesCS5B02G088200.1		c5_102
TraesCS2A02G076100.1		c5_102
PB.28747.2		c5_102
TraesCS3A02G497300.1		c5_102
TraesCS1B02G390900.2		c5_102
PB.46601.3		c5_102
PB.37058.2		c5_102
TraesCS1A02G120100.1		c5_102
TraesCS3D02G283700.1		c5_102
PB.45253.1		c5_102
PB.42949.6		c5_102
PB.31280.2		c5_102
TraesCS5D02G509400.1		c5_102
TraesCS6D02G317200.1		c5_102
TraesCS2A02G561300.1		c5_102
PB.9636.5		c5_102
PB.37984.2		c5_102
PB.819.1		c5_102
TraesCS6D02G363100.1		c5_102
PB.9908.1		c5_102
TraesCS3B02G306000.1		c5_102
TraesCS6D02G349400.1		c5_102
PB.27226.3		c5_102
TraesCS3A02G525500.1		c5_102
PB.43129.4		c5_102
TraesCS7B02G095500.1		c5_102
TraesCS2B02G552800.1		c5_102
PB.48972.2		c5_102
TraesCS1D02G079100.1		c5_102
TraesCS7A02G432600.1		c5_102
TraesCS2D02G225900.1		c5_102
PB.5321.2		c5_102
TraesCS5B02G295400.1		c5_102
PB.27922.7		c5_102
PB.34814.1		c5_102
TraesCS2D02G075100.1		c5_102
PB.23626.5		c5_102
TraesCS5B02G418800.1		c5_102
TraesCS7B02G326200.1		c5_102
TraesCS6A02G238600.1		c5_102
PB.18381.1		c5_102
TraesCS5D02G228900.1		c5_102
PB.49029.1		c5_102
TraesCS1D02G094200.1		c5_102
TraesCS6B02G309700.1		c5_102
PB.45176.1		c5_102
TraesCS1A02G302300.1		c5_102
TraesCS1D02G019400.1		c5_102
PB.16027.1		c5_102
TraesCS5D02G344000.1		c5_102
TraesCS2A02G436300.1		c5_102
PB.26302.2		c5_102
TraesCS3A02G174900.1		c5_102
TraesCS5D02G253200.1		c5_102
PB.582.2		c5_102
TraesCS3D02G264100.1		c5_102
TraesCS3A02G419700.1		c5_102
PB.397.1		c5_102
TraesCS4A02G250400.1		c5_102
PB.34557.1		c5_102
TraesCS2A02G397600.1		c5_102
TraesCS5D02G170000.1		c5_102
TraesCS3D02G464000.1		c5_102
PB.7856.3		c5_102
PB.35161.1		c5_102
TraesCS1B02G070600.1		c5_102
PB.14554.1		c5_102
PB.31887.1		c5_102			Z168N vs. Y13N
PB.46490.2		c5_102
TraesCS7B02G434200.1		c5_102
TraesCS2D02G471500.1		c5_102
TraesCS2A02G082400.1		c5_102
TraesCS3B02G536100.1		c5_102
PB.15981.1		c5_102
TraesCS3B02G562900.1		c5_102
PB.159.1		c5_102
PB.32966.3		c5_102
TraesCS5D02G016200.1		c5_102
TraesCSU02G057200.1		c5_102
PB.41525.2		c5_102
PB.36722.2		c5_102
TraesCS4D02G027000.1		c5_102			Z168N vs. Y13N
TraesCS6B02G240900.1		c5_102
PB.39830.1		c5_102			Z168N vs. Y13N
TraesCS1B02G381800.1		c5_102
TraesCS3D02G535700.1		c5_102
PB.24255.1		c5_102
TraesCS4D02G238600.1		c5_102
TraesCS7A02G434400.1		c5_102
TraesCS5D02G254500.1		c5_102
TraesCS1B02G136000.1		c5_102
TraesCS3D02G279900.1		c5_102
PB.3327.1		c5_102
TraesCS5B02G287600.1		c5_102
PB.8364.11		c5_102			Z168N vs. Y13N
PB.41202.2		c5_102
PB.27922.8		c5_102
TraesCS1A02G359900.1		c5_102
TraesCS3D02G391100.1		c5_102
PB.13257.2		c5_102
TraesCS6A02G055400.1		c5_102
PB.36342.1		c5_102
TraesCS7B02G383000.1		c5_102
TraesCS1B02G364200.2		c5_102
PB.5304.2		c5_102
TraesCS2B02G441000.1		c5_102
PB.36841.1		c5_102
TraesCS7B02G137000.1		c5_102
TraesCS5B02G377600.1		c5_102
TraesCS3A02G359900.1		c5_102
PB.36915.3		c5_102
PB.24825.5		c5_102
TraesCS5B02G481100.1		c5_102
PB.45850.2		c5_102
TraesCS7B02G257700.1		c5_102
TraesCS3D02G202800.2		c5_102			Z168N vs. Y13N
PB.19514.1		c5_102
TraesCS4D02G309000.1		c5_102
PB.4720.3		c5_102
TraesCS7A02G339900.1		c5_102
PB.27070.7		c5_102
PB.24590.3		c5_102
TraesCS5D02G091000.1		c5_102
TraesCS3D02G486800.1		c5_102
PB.39048.1		c5_102
TraesCS4A02G036600.3		c5_102
TraesCS1D02G245200.1		c5_102
TraesCS2D02G226500.1		c5_102
TraesCS2D02G031100.1		c5_102
TraesCS1D02G326400.1		c5_102
PB.2914.3		c5_102
TraesCS5D02G117800.2		c5_102
TraesCS2B02G592500.1		c5_102
TraesCS1A02G210000.1		c5_102
TraesCS7A02G420400.1		c5_102
TraesCS4D02G287800.1		c5_102
PB.35567.1		c5_102
PB.9270.2		c5_102
TraesCS6A02G312900.1		c5_102
PB.21429.1		c5_102
TraesCS2B02G487800.1		c5_102
TraesCS7D02G328500.1		c5_102
TraesCS4D02G199100.3		c5_102
TraesCS7A02G353500.1		c5_102
PB.5359.5		c5_102			Z168N vs. Y13N
PB.7618.1		c5_102			Z168N vs. Y13N
TraesCS3D02G132000.1		c5_102
TraesCS1B02G060200.1		c5_102
PB.7872.1		c5_102
TraesCS7D02G379300.1		c5_102
PB.5421.4		c5_102
TraesCS3D02G464400.1		c5_102
TraesCS2B02G423800.1		c5_102
TraesCS2A02G484100.1		c5_102
PB.18429.5		c5_102			Z168N vs. Y13N
PB.25909.1		c5_102
TraesCS2D02G215000.1		c5_102
TraesCS1B02G261400.1		c5_102
TraesCS3D02G225900.1		c5_102
TraesCS1A02G212300.1		c5_102
PB.38934.2		c5_102
PB.23267.2		c5_102			Z168N vs. Y13N
PB.1098.1		c5_102
TraesCS7A02G103500.1		c5_102
TraesCS2A02G515000.1		c5_102
TraesCSU02G057100.1		c5_102
PB.15102.4		c5_102
TraesCS3A02G334200.1		c5_102
TraesCS2A02G384200.1		c5_102
TraesCS1D02G294400.1		c5_102
PB.9876.4		c5_102			Z168N vs. Y13N
TraesCS2B02G483000.1		c5_102
TraesCS6A02G307800.1		c5_102
TraesCS7D02G097600.1		c5_102
TraesCSU02G023500.3		c5_102
PB.45356.1		c5_102			Z168N vs. Y13N
PB.45886.1		c5_102
TraesCS4A02G341500.1		c5_102
TraesCS4B02G396100.1		c5_102
TraesCS5D02G136600.1		c5_102
TraesCSU02G149951.1		c5_102
TraesCS3B02G264900.1		c5_102
TraesCS3A02G317100.1		c5_102
TraesCS1D02G243100.1		c5_102
TraesCS2B02G208200.1		c5_102
TraesCS4D02G030000.1		c5_102
TraesCS7D02G053700.1		c5_102
TraesCS7D02G118200.1		c5_102
TraesCS1B02G276800.1		c5_102
TraesCS5D02G492300.1		c5_102
PB.46480.6		c5_102			Z168N vs. Y13N
PB.50460.42		c5_102
TraesCS1A02G157600.1		c5_102
TraesCS6A02G153600.1		c5_102
TraesCS6B02G333100.1		c5_102
TraesCS7A02G537500.1		c5_102
TraesCS7D02G421800.1		c5_102
TraesCS7A02G177500.1		c5_102
TraesCS7B02G282400.1		c5_102
PB.49228.2		c5_102
PB.45764.1		c5_102
PB.42884.1		c5_102
TraesCS5D02G089200.1		c5_102
TraesCS7B02G130200.1		c5_102
TraesCS6A02G268900.1		c5_102
PB.26288.2		c5_102
PB.38691.3		c5_102
TraesCS4A02G333600.1		c5_102
TraesCS5D02G014400.1		c5_102
TraesCS5D02G177900.1		c5_102
TraesCS7A02G035300.1		c5_102
TraesCS3D02G206600.1		c5_102
TraesCS6B02G116700.1		c5_102
PB.24503.4		c5_102
PB.25001.2		c5_102
TraesCS5B02G423000.1		c5_102
PB.40588.6		c5_102			Z168N vs. Y13N
TraesCS5D02G419800.1		c5_102
TraesCS2B02G152300.1		c5_102
TraesCS3D02G344900.1		c5_102
PB.29325.1		c5_102
TraesCS4A02G304100.1		c5_102
TraesCS4D02G013500.1		c5_102
TraesCS5B02G353200.1		c5_102
TraesCS2A02G409800.1		c5_102
TraesCS5D02G450100.1		c5_102
TraesCS6B02G237100.1		c5_102
TraesCS1B02G198400.1		c5_102
TraesCS2B02G249800.3		c5_102
TraesCS5A02G126600.1		c5_102
PB.38814.14		c5_102			Z168N vs. Y13N
TraesCS5B02G138300.1		c5_102
PB.2167.1		c5_102
PB.3341.296		c5_102
PB.584.2		c5_102			Z168N vs. Y13N
TraesCS6B02G143100.1		c5_102
TraesCS6D02G167200.1		c5_102
PB.47790.2		c5_102
TraesCS5A02G548000.5		c5_102
PB.33945.1		c5_102
PB.7511.2		c5_102
TraesCS4A02G116400.1		c5_102
TraesCS4D02G066400.1		c5_102
PB.34472.2		c5_102
TraesCS7A02G115400.1		c5_102
PB.3292.1		c5_102
PB.33989.2		c5_102
TraesCS1D02G364400.1		c5_102
TraesCS1B02G203300.1		c5_102
PB.3292.2		c5_102
TraesCS2D02G210700.1		c5_102
TraesCS7B02G354000.2		c5_102
PB.48071.5		c5_102
PB.48746.5		c5_102
PB.44334.1		c5_102
PB.44753.1		c5_102
TraesCS7D02G094800.1		c5_102
PB.12114.1		c5_102
TraesCS4A02G057500.1		c5_102
TraesCS5A02G548000.2		c5_102
TraesCS6A02G247900.2		c5_102
PB.20538.1		c5_102
PB.22885.4		c5_102
PB.14417.2		c5_102
PB.40407.1		c5_102
TraesCS5B02G384100.1		c5_107
PB.12334.2		c5_107
PB.17804.1		c5_107
TraesCS2B02G023400.2		c5_107
PB.1513.1		c5_107
PB.46241.1		c5_107
PB.1407.1		c5_107
PB.25894.1		c5_107			Z168N vs. Y13N
PB.3538.1		c5_107
TraesCS2B02G114700.2		c5_107
TraesCS2A02G491200.1		c5_107
PB.47844.1		c5_107
TraesCS5B02G005300.1		c5_107
TraesCS7A02G171500.1		c5_107
TraesCS6D02G272100.1		c5_107
PB.28130.1		c5_107
PB.19343.2		c5_107
TraesCS2D02G024400.1		c5_107
PB.30933.2		c5_107
PB.32974.1		c5_107
PB.8267.1		c5_107
TraesCS3D02G539500.1		c5_107
PB.11414.1		c5_107
PB.15567.1		c5_107
PB.8539.1		c5_107
PB.2361.1		c5_107
PB.39135.2		c5_107
PB.24636.1		c5_107
PB.18837.1		c5_107
PB.37947.1		c5_107
TraesCS5B02G373300.1		c5_107
PB.36406.3		c5_107
PB.40136.1		c5_107
PB.47147.2		c5_107
PB.49490.1		c5_107
PB.9438.2		c5_107
PB.11020.1		c5_107
PB.43486.5		c5_107
TraesCS3B02G535500.1		c5_107
TraesCS4A02G340300.1		c5_107
TraesCS6A02G015800.2		c5_107
TraesCS7B02G119800.1		c5_107
TraesCS3B02G283100.1		c5_107
TraesCS6B02G066000.1		c5_107
PB.9781.1		c5_107
PB.10509.1		c5_107
TraesCS6D02G366500.1		c5_107
TraesCS6D02G376800.1		c5_107
TraesCS7B02G265100.1		c5_454
TraesCS5D02G011900.1		c5_454
PB.32642.2		c5_454
TraesCS4A02G092900.1		c5_454
PB.18449.1		c5_454
TraesCS7D02G549900.1		c5_454
PB.6808.1		c5_454
PB.993.1		c5_454
TraesCS1D02G000100.1		c5_454
PB.8248.3		c5_454
PB.23112.2		c5_454
PB.8421.1		c5_454
TraesCS1B02G034300.1		c5_454
TraesCS4A02G225100.1		c5_454
TraesCS5A02G081900.1		c5_454
TraesCS3B02G435500.1		c5_454
PB.20404.1		c5_454			Z168N vs. Y13N
PB.24732.2		c5_454
TraesCS2D02G501100.1		c5_454
TraesCS7D02G154200.1		c5_454
TraesCS1B02G228500.1		c5_454
TraesCS3A02G424000.1		c5_454
TraesCSU02G108000.1		c5_454
TraesCS2D02G187400.1		c5_454
PB.10279.1		c5_454
PB.39961.1		c5_454
PB.19543.1		c5_454
PB.38909.179		c5_454
TraesCS5B02G016400.1		c5_454
PB.45533.1		c5_454
TraesCS4A02G414700.1		c5_454
PB.10354.1		c5_454
TraesCS3B02G169300.1		c5_454
TraesCS5A02G262100.1		c5_454
PB.24124.1		c5_454
PB.2829.1		c5_454
PB.22993.1		c5_454
PB.40929.1		c5_454
PB.45886.3		c5_454
PB.6607.4		c5_454
PB.4490.1		c5_454
TraesCS3D02G246800.1		c5_454
PB.10130.2		c5_454
TraesCS2A02G540400.1		c5_454
TraesCS7B02G393400.1		c5_454
TraesCS5B02G252100.1		c5_454
PB.50520.1		c5_454
TraesCS2B02G082800.1		c5_454
PB.47986.1		c5_454
PB.50516.1		c5_454
PB.21029.1		c5_454
PB.14762.1		c5_454
PB.6607.8		c5_454
TraesCS7D02G149800.1		c5_454
PB.44058.1		c5_454
PB.38788.4		c5_454
PB.47052.3		c5_454			Z168N vs. Y13N
TraesCS6A02G051600.1		c5_454
TraesCS2D02G150600.1		c5_454
PB.44341.1		c5_454
PB.46881.1		c5_454
PB.76.3		c5_454
PB.26164.2		c5_454
TraesCS5A02G268100.1		c5_454
TraesCS3B02G518700.1		c5_454
TraesCS2D02G523400.1		c5_454
PB.15597.1		c5_454
PB.40533.1		c5_454
TraesCS3B02G380500.1		c5_454
TraesCS5D02G045100.1		c5_454
TraesCS2B02G497700.1		c5_454
PB.46459.1		c5_454
PB.46423.1		c5_454
PB.23357.1		c5_454
TraesCS3B02G264000.1		c5_454
PB.47570.1		c5_454
TraesCS4B02G383800.1		c5_454
TraesCS6A02G411800.1		c5_454
TraesCS1A02G221300.1		c5_454
TraesCS3B02G507100.1		c5_454
TraesCS3A02G029600.1		c5_454
TraesCS2B02G165300.1		c5_454
TraesCS2D02G531400.1		c5_454
TraesCS6B02G363500.1		c5_454
TraesCS2B02G553500.1		c5_454
PB.46538.4		c5_454			Z168N vs. Y13N
TraesCS3D02G428600.1		c5_454
TraesCS3D02G374200.1		c5_454
PB.46417.2		c5_454
TraesCS1B02G442000.1		c5_454
PB.32965.2		c5_454
TraesCS3B02G110600.1		c5_454
PB.50363.1		c5_454
PB.25032.1		c5_454
PB.24956.2		c5_454
TraesCS6D02G298300.1		c5_454
TraesCS3B02G422300.1		c5_454
PB.24438.1		c5_454
PB.3616.2		c5_454			Z168N vs. Y13N
PB.15341.1		c5_454
PB.26574.3		c5_454
PB.6778.1		c5_454
PB.29717.1		c5_454
PB.48959.1		c5_454
TraesCS5D02G056600.1		c5_454
PB.39008.2		c5_454			Z168N vs. Y13N
PB.7318.4		c5_454
TraesCS2D02G493700.1		c5_454
PB.38906.1		c5_454
PB.40095.1		c5_454
PB.48312.1		c5_454
PB.8314.2		c5_454			Z168N vs. Y13N
TraesCS5A02G275400.1		c5_454
PB.23391.1		c5_454
PB.4752.3		c5_454
TraesCS3D02G115400.1		c5_454
TraesCS4A02G409100.1		c5_454
PB.29835.1		c5_454
TraesCS3A02G436800.1		c5_454
PB.2899.2		c5_454
TraesCS7B02G062400.1		c5_454
TraesCS7A02G428100.1		c5_454
PB.7942.1		c5_454
TraesCS3A02G357600.1		c5_454
PB.20526.2		c5_454
TraesCS7B02G486800.1		c5_454
TraesCS4A02G036900.1		c5_454
PB.48943.1		c5_454
PB.9857.1		c5_454
PB.50813.2		c5_454
PB.31880.1		c5_454
PB.50462.1		c5_454
TraesCS3B02G093000.1		c5_454
PB.31965.1		c5_454
TraesCS7B02G293200.1		c5_454
PB.49855.1		c5_454
PB.17854.1		c5_454
PB.23729.3		c5_454
PB.48222.1		c5_454
TraesCS1A02G404600.1		c5_454
TraesCS7B02G238800.1		c5_454
TraesCS5A02G018900.1		c5_454
PB.12543.3		c5_454
PB.658.1		c5_454
TraesCS3D02G058900.1		c5_454
TraesCS2A02G199500.1		c5_454
TraesCS4A02G207900.1		c5_454
PB.12107.1		c5_454
PB.4308.4		c5_454
PB.47476.1		c5_454
TraesCS1D02G249800.1		c5_454
TraesCS7A02G147000.1		c5_454
TraesCS3B02G059300.1		c5_454
PB.36471.1		c5_454
PB.11752.1		c5_454
PB.11079.3		c5_454
PB.23957.2		c5_454
TraesCS1B02G043200.1		c5_454
TraesCS5D02G378200.1		c5_454
PB.46780.4		c5_454			Z168N vs. Y13N
TraesCS3B02G167100.1		c5_454
PB.18167.2		c5_454
PB.22695.1		c5_454
PB.9732.1		c5_454
PB.29693.1		c5_454
PB.10413.3		c5_454
PB.4362.3		c5_454
PB.3562.1		c5_454
TraesCS3B02G597700.1		c5_454
TraesCS7D02G179200.1		c5_454
TraesCS2D02G264200.1		c5_454
PB.41640.3		c5_454
PB.37093.1		c5_454
TraesCS1A02G307700.1		c5_454
TraesCS3D02G078500.1		c5_454
TraesCS2D02G065100.2		c5_454
TraesCS5A02G385700.1		c5_454
TraesCS3A02G141800.1		c5_454
PB.15951.1		c5_454
TraesCS3B02G474700.1		c5_454
TraesCS5B02G378400.3		c5_454
PB.13394.1		c5_454
PB.7984.1		c5_454
TraesCS7B02G121800.1		c5_454
TraesCS1B02G294900.1		c5_454
PB.47071.2		c5_454
PB.29577.1		c5_454
PB.37898.1		c5_454
PB.7929.2		c5_454
TraesCS7B02G441100.1		c5_454
TraesCS7B02G283000.1		c5_454
PB.45670.1		c5_454
TraesCS7A02G248800.1		c5_454
TraesCS7A02G272800.1		c5_454
PB.29811.3		c5_454
TraesCS2D02G426700.1		c5_454
PB.48080.3		c5_454
TraesCS4B02G090100.1		c5_454
PB.14810.1		c5_454
TraesCS6D02G295500.1		c5_454
PB.42776.4		c5_454
PB.33991.8		c5_454
TraesCS5D02G273700.1		c5_454
PB.44307.1		c5_454
PB.17805.2		c5_454			Z168N vs. Y13N
TraesCS5B02G384000.1		c5_454
TraesCS3A02G483100.1		c5_454
TraesCS1B02G047000.1		c5_454
TraesCS2D02G448900.1		c5_454
PB.13236.2		c5_454
TraesCS5A02G360700.1		c5_454
PB.36077.1		c5_454
PB.40023.1		c5_454
PB.20738.2		c5_454
PB.10999.1		c5_454
TraesCS6D02G290100.3		c5_454
TraesCS1A02G051600.1		c5_454
PB.11302.1		c5_454			Z168N vs. Y13N
PB.10190.2		c5_454
TraesCS7D02G128300.1		c5_454
TraesCS2D02G394100.1		c5_454
TraesCS6A02G379300.1		c5_454
PB.5034.1		c5_454
TraesCS6A02G008700.1		c5_454
PB.21814.2		c5_454
PB.32629.2		c5_454
TraesCS3B02G414200.1		c5_454
TraesCS2B02G398400.1		c5_454
PB.19299.2		c5_454
TraesCS1D02G067351.1		c5_454
PB.34510.4		c5_454			Z168N vs. Y13N
TraesCS1B02G334600.2		c5_454			Z168N vs. Y13N
TraesCS5B02G075600.1		c5_454
TraesCS1B02G285900.1		c5_454
TraesCS7A02G357200.1		c5_454
PB.22324.1		c5_454
PB.28078.1		c5_454
TraesCS5D02G013300.1		c5_454
PB.48983.1		c5_454
TraesCS2D02G440500.1		c5_454
PB.2824.4		c5_454			Z168N vs. Y13N
TraesCS3B02G300000.1		c5_454			Z168N vs. Y13N
PB.20014.2		c5_454
TraesCS5D02G056800.1		c5_454
PB.15688.1		c5_454			Z168N vs. Y13N
PB.2365.2		c5_454
TraesCS1A02G219000.1		c5_454
TraesCS7A02G213700.1		c5_454
PB.33946.8		c5_454			Z168N vs. Y13N
TraesCS6A02G113600.1		c5_454
PB.4202.1		c5_454
TraesCS5B02G268600.1		c5_454
PB.44417.2		c5_454
TraesCSU02G247100.1		c5_454
TraesCS1B02G168200.2		c5_454
PB.14573.2		c5_454
TraesCS4D02G191200.1		c5_454
PB.9156.12		c5_454			Z168N vs. Y13N
TraesCS1B02G452400.1		c5_454
TraesCS3B02G092400.1		c5_454
PB.35504.1		c5_454
TraesCS7B02G365100.1		c5_454
TraesCS6D02G347700.1		c5_454
PB.12314.1		c5_454
TraesCS6B02G128600.1		c5_454
PB.36990.1		c5_454
PB.11568.2		c5_454
PB.37739.2		c5_454
PB.43129.3		c5_454
PB.48046.1		c5_454
PB.6607.7		c5_454
PB.31218.1		c5_454
PB.16370.1		c5_454
PB.27245.1		c5_454
PB.14589.1		c5_454
TraesCS5D02G464000.1		c5_454
TraesCS6A02G034200.1		c5_454
PB.27436.1		c5_454
TraesCS7B02G138900.2		c5_454
TraesCS4B02G202100.1		c5_454
PB.34700.1		c5_454
TraesCS2D02G524200.1		c5_454
PB.34245.1		c5_454
PB.35234.3		c5_454
TraesCS2D02G271400.1		c5_454
TraesCS7D02G217100.1		c5_454
TraesCS1D02G434100.2		c5_454
TraesCS4A02G350900.1		c5_454
TraesCS2B02G385700.1		c5_454
TraesCS5A02G540900.1		c5_454
PB.25911.1		c5_454
TraesCS6D02G288000.1		c5_454
TraesCS4B02G274700.1		c5_454
PB.22024.1		c5_454
TraesCS5A02G294600.1		c5_454
TraesCS5B02G405400.1		c5_454
TraesCS4D02G212900.1		c5_454
PB.43126.1		c5_454
PB.17246.1		c5_454
PB.13646.2		c5_454
PB.40017.2		c5_454
TraesCS6B02G049100.1		c5_454
TraesCS7A02G465300.1		c5_454
PB.418.2		c5_454
PB.48270.1		c5_454
PB.10139.2		c5_454
TraesCS5A02G404500.1		c5_454
TraesCS1D02G028500.1		c5_454
TraesCS5A02G095400.1		c5_454
TraesCS7B02G035100.1		c5_454
PB.2560.1		c5_454
TraesCS2B02G232500.1		c5_454
TraesCS5A02G468600.2		c5_454
PB.24895.1		c5_454
PB.48685.3		c5_454
PB.27472.1		c5_454
PB.17799.4		c5_454			Z168N vs. Y13N
PB.19568.3		c5_454
PB.10192.2		c5_454
TraesCS3A02G381500.1		c5_454
TraesCS6B02G120300.1		c5_454
TraesCS7B02G063500.5		c5_454
TraesCS2D02G426000.1		c5_454
TraesCS6A02G312000.2		c5_454
TraesCS3D02G413800.1		c5_454
TraesCS7D02G494200.1		c5_454
PB.12603.1		c5_454
PB.39196.2		c5_454
TraesCS4D02G063200.1		c5_454
PB.33445.3		c5_454			Z168N vs. Y13N
TraesCS5D02G491000.1		c5_454
PB.28173.1		c5_454			Z168N vs. Y13N
PB.30408.2		c5_454
PB.25430.1		c5_454			Z168N vs. Y13N
PB.13170.3		c5_454
TraesCS6A02G099313.1		c5_454
TraesCS7B02G053400.1		c5_454
TraesCS5D02G332600.1		c5_454
TraesCS5B02G356300.1		c5_454
TraesCS5A02G004300.2		c5_454
TraesCS2A02G389400.1		c5_454
PB.8552.1		c5_454
TraesCS3D02G353200.1		c5_454
PB.40033.1		c5_454
PB.31489.1		c5_454
PB.31350.7		c5_454
PB.48720.2		c5_454
TraesCS2A02G096500.1		c5_454
TraesCS2B02G063900.1		c5_454
TraesCS6A02G343600.1		c5_454
TraesCS6A02G379800.1		c5_454
TraesCS7A02G379800.1		c5_454
TraesCS3B02G322900.1		c5_454
PB.46538.9		c5_454			Z168N vs. Y13N
TraesCS7B02G366500.1		c5_454
PB.41420.2		c5_454
TraesCS5D02G403700.1		c5_454
TraesCS7A02G549300.2		c5_454
TraesCS7D02G132600.1		c5_454
PB.27734.6		c5_454
PB.37515.1		c5_454
PB.40905.1		c5_454
PB.49449.1		c5_454
PB.8745.4		c5_454
TraesCS2A02G482400.1		c5_454
TraesCS3A02G167000.1		c5_454
TraesCS3D02G221100.1		c5_454
TraesCS5D02G328200.1		c5_454
TraesCS5D02G504200.1		c5_454
TraesCS7A02G407300.1		c5_454
TraesCS2D02G572300.1		c5_454
PB.35677.6		c5_454			Z168N vs. Y13N
TraesCS1A02G356000.1		c5_454
PB.12075.1		c5_454
TraesCS7A02G119400.1		c5_454
PB.1666.2		c5_454			Z168N vs. Y13N
PB.28803.4		c5_454
PB.36388.1		c5_454
TraesCS1D02G194700.1		c5_454
TraesCS4A02G091300.1		c5_454
TraesCS6B02G161300.1		c5_454
TraesCS3B02G369200.1		c5_454
PB.5626.1		c5_454
TraesCS3A02G358200.1		c5_454
PB.32834.2		c5_454
PB.15442.3		c5_454
TraesCS2B02G079100.1		c5_454
PB.16343.2		c5_454
PB.34760.2		c5_454
TraesCS5B02G134200.1		c5_454
PB.23118.6		c5_454
PB.12150.1		c5_454
PB.49431.2		c5_454
TraesCS2A02G360000.1		c5_454
TraesCS4B02G067500.1		c5_454
TraesCS7A02G427200.1		c5_454
TraesCS3B02G217000.1		c5_454
PB.21661.1		c5_454
TraesCS3A02G442500.1		c5_454
TraesCS6B02G439400.1		c5_454
TraesCS6B02G027800.1		c5_454
TraesCS2B02G428200.1		c5_454
PB.20416.1		c5_454
TraesCS6D02G040700.1		c5_454
TraesCS7D02G243400.1		c5_454
TraesCS2D02G581700.1		c5_454
TraesCS5D02G486600.1		c5_454
TraesCS6A02G198200.1		c5_454
TraesCS5A02G373500.1		c5_454
PB.25969.2		c5_454
PB.30335.2		c5_454
PB.48920.1		c5_454
TraesCS3A02G209300.1		c5_454
PB.11350.3		c5_454
PB.36760.2		c5_454
PB.42286.1		c5_454
PB.23216.3		c5_454
PB.7903.1		c5_454
PB.46462.2		c5_455
TraesCS7D02G024300.1		c5_455
TraesCS5A02G059300.1		c5_455
TraesCS2B02G340800.2		c5_455
PB.16011.1		c5_455
PB.47078.1		c5_455
PB.13401.1		c5_455
TraesCSU02G081300.1		c5_455
PB.17504.5		c5_455
TraesCS1D02G361200.1		c5_455
PB.23544.2		c5_455
TraesCS1B02G070500.1		c5_455
TraesCS6D02G104500.1		c5_455
TraesCS2D02G274200.4		c5_455
PB.25290.1		c5_455			Z168N vs. Y13N
TraesCS6A02G328300.1		c5_455
PB.36896.1		c5_455
TraesCS5B02G440500.1		c5_455
PB.42797.4		c5_455
TraesCS1B02G035000.1		c5_455
PB.18937.1		c5_455			Z168N vs. Y13N
PB.45889.1		c5_455
PB.2155.1		c5_455
PB.35878.1		c5_455
TraesCS3D02G196000.1		c5_455
TraesCS1A02G053800.1		c5_455
TraesCS6B02G110100.3		c5_455
TraesCS7D02G393100.1		c5_455
PB.33729.2		c5_455
PB.41153.2		c5_455
PB.7370.1		c5_455
TraesCS7B02G342700.1		c5_455
[truncated: 627 more rows]

## Sheet: Table S14
Supplementary Table S14: Enriched GO terms of genes in MEGENA significant modules under Z168N versus Y13N comparison
ID	WGCNA_brown_GO	DETs_GO	enrichmentScore	NES	pvalue	p.adjust	qvalues
BP: protein folding (GO:0006457)	YES	YES	0.598136	3.0372	1e-10	5.17e-09	3.93e-09
BP: response to heat (GO:0009408)	YES	YES	0.635882	3.26115	1e-10	5.17e-09	3.93e-09
MF: unfolded protein binding (GO:0051082)	YES	YES	0.656341	3.05168	1e-10	5.17e-09	3.93e-09
MF: nutrient reservoir activity (GO:0045735)	YES	YES	0.678544	2.86298	2.99e-09	1.16e-07	8.81e-08
BP: response to temperature stimulus (GO:0009266)	YES	YES	0.611988	2.70653	2.52e-08	7.81e-07	5.94e-07
BP: response to stress (GO:0006950)	YES	YES	0.50381	2.55824	5.66e-08	1.46e-06	1.11e-06
CC: nucleosome (GO:0000786)	YES	YES	-0.571208	-2.89793	7.82e-07	1.73e-05	1.32e-05
BP: response to hydrogen peroxide (GO:0042542)	YES	YES	0.659541	2.41275	4.67e-06	9.05e-05	6.89e-05
BP: response to abiotic stimulus (GO:0009628)	YES	YES	0.493101	2.32182	9.23e-06	0.000158959	0.000120906
MF: protein heterodimerization activity (GO:0046982)	YES	YES	-0.507797	-2.58861	1.24e-05	0.000192215	0.000146201
BP: protein complex oligomerization (GO:0051259)	YES	YES	0.656778	2.36267	1.38e-05	0.000194283	0.000147774
BP: response to metal ion (GO:0010038)	YES	YES	0.671169	2.1893	0.000116626	0.00150641	0.0011458
BP: protein-containing complex assembly (GO:0065003)	YES	YES	0.675439	2.13729	0.000197992	0.00204592	0.00155615
BP: protein-containing complex subunit organization (GO:0043933)	YES	YES	0.675439	2.13729	0.000197992	0.00204592	0.00155615
BP: response to cadmium ion (GO:0046686)	YES	YES	0.613292	2.11088	0.000352144	0.00341139	0.00259474
BP: CC organization (GO:0016043)	YES	YES	0.517909	2.08097	0.000958604	0.00749749	0.00570267
BP: CC assembly (GO:0022607)	YES	YES	0.59723	2.01155	0.00131803	0.00888235	0.00675601
BP: CC biogenesis (GO:0044085)	YES	YES	0.59723	2.01155	0.00131803	0.00888235	0.00675601
MF: serine-type endopeptidase inhibitor activity (GO:0004867)	NO	YES	-0.673933	-2.40769	0.00015466	0.00184402	0.00140259
BP: starch biosynthetic process (GO:0019252)	NO	YES	-0.619143	-2.21195	0.000717586	0.00617922	0.00469998
BP: CC organization or biogenesis (GO:0071840)	NO	YES	0.502481	1.98987	0.0015827	0.00981272	0.00746366
BP: response to wounding (GO:0009611)	NO	YES	-0.561178	-2.0891	0.00427092	0.0245183	0.0186489
BP: response to high light intensity (GO:0009644)	NO	YES	0.562545	1.78006	0.00813077	0.0393834	0.0299555
BP: response to inorganic substance (GO:0010035)	YES	NO	0.571769	2.00051	0.000987995	0.00749749	0.00570267
CC: plastid (GO:0009536)	YES	NO	0.409878	1.95184	0.00101579	0.00749749	0.00570267
BP: biological_process (GO:0008150)	YES	NO	0.508624	2.04366	0.00139779	0.00902742	0.00686635
CC: obsolete cell part (GO:0044464)	YES	NO	0.476229	1.91349	0.00442919	0.0245187	0.0186492
MF: sequence-specific DNA binding (GO:0043565)	YES	NO	0.40277	1.75478	0.00752181	0.0376091	0.0286059
BP: response to chemical (GO:0042221)	NO	NO	0.50381	2.09269	0.000494585	0.00450945	0.00342994
BP: response to stimulus (GO:0050896)	NO	NO	0.402135	1.85067	0.00354382	0.0211266	0.0160691
BP: protein refolding (GO:0042026)	NO	NO	0.614616	1.83841	0.00472278	0.0252424	0.0191997
MF: hydrolase activity//acting on ester bonds (GO:0016788)	NO	NO	-0.501628	-1.97161	0.00507253	0.0262081	0.0199342
CC: intracellular (GO:0005622)	NO	NO	0.457346	1.81113	0.00888843	0.0417487	0.0317545
YES: overlapped; NO: not overlapped

## Sheet: Table S15
Supplementary Table S15: Enriched Pfam of genes in MEGENA significant modules under Z168N versus Y13N comparison
ID	WGCNA_brown_Pfam	DETs_Pfam	enrichmentScore	NES	pvalue	p.adjust	qvalues
PF00011: Hsp20/alpha crystallin family	YES	YES	0.644965	3.2091	1e-10	2.65e-09	1.16e-09
PF17886: HSP20-like domain found in ArsA	YES	YES	0.69453	3.27056	1e-10	2.65e-09	1.16e-09
PF00234: Protease inhibitor/seed storage/LTP family	YES	YES	0.646122	2.57362	1.51e-07	2.66e-06	1.16e-06
PF00012: Hsp70 protein	YES	YES	0.660926	2.53518	5.97e-07	7.91e-06	3.46e-06
PF06723: MreB/Mbl protein	YES	YES	0.649182	2.40032	9.58e-06	8.46e-05	3.7e-05
PF05496: Holliday junction DNA helicase RuvB P-loop domain	YES	YES	0.695	2.21142	3.85e-05	0.000291771	0.000127487
PF00183: Hsp90 protein	YES	YES	0.764866	2.27332	4.44e-05	0.000294279	0.000128583
PF13173: AAA domain	YES	YES	0.671538	2.13677	8.9e-05	0.000523872	0.000228901
PF17871: AAA lid domain	YES	YES	0.657154	2.12411	0.000124937	0.00060197	0.000263026
PF00226: DnaJ domain	YES	YES	0.538485	2.10215	0.000193547	0.000854835	0.000373513
PF02861: Clp amino terminal domain	YES	YES	0.653006	2.0778	0.000223484	0.000911128	0.00039811
PF00447: HSF-type DNA-binding	YES	YES	0.641239	2.07266	0.000257673	0.000929217	0.000406013
PF00158: Sigma-54 interaction domain	YES	YES	0.622631	2.05908	0.000262986	0.000929217	0.000406013
PF00910: RNA helicase	YES	YES	0.649731	2.01992	0.000594519	0.00175053	0.000764878
PF10431: C-terminal	YES	YES	0.59746	2.05101	0.000673501	0.00187871	0.000820887
PF13401: AAA domain	YES	YES	0.569264	1.99171	0.00101228	0.0025548	0.0011163
PF13016: Cys-rich Gliadin N-terminal	NO	YES	0.713504	2.30624	8.96e-06	8.46e-05	3.7e-05
PF00125: Core histone H2A/H2B/H3/H4	NO	YES	-0.516977	-2.14056	0.000969685	0.0025548	0.0011163
PF01695: IstB-like ATP binding protein	NO	YES	0.595541	1.83256	0.00574642	0.0127791	0.0055837
PF13181: Tetratricopeptide repeat	NO	YES	0.541841	1.75138	0.00888177	0.0181051	0.00791089
PF10551: MULE transposase domain	NO	YES	-0.524881	-1.76561	0.0124796	0.023611	0.0103166
PF00004: ATPase family associated with various cellular activities (AAA)	NO	NO	0.552651	2.15745	0.000113522	0.000601666	0.000262893
PF07724: AAA domain (Cdc48 subfamily)	NO	NO	0.609354	2.09184	0.0004392	0.00136927	0.000598291
PF07728: AAA domain (dynein-related subfamily)	NO	NO	0.609354	2.09184	0.0004392	0.00136927	0.000598291
PF13191: AAA ATPase domain	NO	NO	0.533747	1.86744	0.00403712	0.00972579	0.0042496
PF07719: Tetratricopeptide repeat	NO	NO	0.536449	1.84156	0.00578675	0.0127791	0.0055837
PF00931: NB-ARC domain	NO	NO	-0.472498	-1.87903	0.00634191	0.0134448	0.00587461
PF00232: Glycosyl hydrolase family 1	NO	NO	-0.508806	-1.76501	0.0124745	0.023611	0.0103166
PF00515: Tetratricopeptide repeat	NO	NO	0.515758	1.70564	0.0129192	0.023611	0.0103166
PF00400: WD domain	NO	NO	-0.479746	-1.6642	0.0211239	0.0373188	0.0163061
YES: overlapped; NO: not overlapped
