# Supplementary material for: The Landscapes of Gluten Regulatory Network in Elite Wheat Cultivars Contrasting in Gluten Strength
Source: Int J Mol Sci. 2023 May 29;24(11):9447. doi: 10.3390/ijms24119447 (PMC10253585; doi:10.3390/ijms24119447)
Supplement: Supplementary file 1 [file ijms-24-09447-s001.zip › Table S16.xlsx]

## Sheet: Table S14
Supplementary Table S16: LncRNA and corresponding targets
lncRNA_ID	Gene_ID
PB.13428.4	TraesCS2D02G018000;TraesCS2D02G018200;TraesCS2D02G018300;TraesCS2D02G018400;TraesCS2D02G018500;TraesCS2D02G018600
PB.27394.1	TraesCS4D02G147500;TraesCS4D02G269400
PB.40104.5	TraesCS6B02G076300;TraesCS6B02G076400;TraesCS6B02G076500
PB.23997.1	PB.23998;TraesCS2B02G594500;TraesCS2D02G564800;TraesCS3A02G276200;TraesCS3A02G397900;TraesCS3B02G310000;TraesCS3D02G276200;TraesCS4A02G139100;TraesCS6A02G302700;TraesCS6A02G385900;TraesCS6D02G370600;TraesCS7A02G446200;TraesCS7B02G345700;TraesCS7D02G435800
PB.22694.1	TraesCS4A02G091400
PB.46759.1	PB.46760;TraesCS1D02G447400
PB.39408.1	PB.39407;PB.40519;TraesCS6B02G231000
PB.21666.3	PB.7269;TraesCS3D02G210100;TraesCS3D02G210200;TraesCS3D02G210300
PB.24096.4	PB.22967;PB.24097;TraesCS4A02G164200;TraesCS6B02G416000
PB.39439.3	PB.2090
PB.11300.1	PB.11298;PB.11301;TraesCS2B02G258500
PB.23732.5	TraesCS2B02G413800;TraesCS3D02G179800;TraesCS4A02G038500;TraesCS4A02G056600;TraesCS4B02G267200;TraesCS4D02G266700;TraesCS5A02G429400;TraesCS5B02G431400;TraesCS5D02G119600;TraesCS5D02G211700;TraesCS7A02G486000;TraesCS7A02G493700;TraesCS7B02G389500
PB.2190.1	PB.15834;TraesCS1B02G037000;TraesCS1B02G037100;TraesCS1B02G037200;TraesCS1B02G037300;TraesCS1B02G037400;TraesCS1B02G037600;TraesCS1B02G037700;TraesCS1B02G037800;TraesCS1B02G037900;TraesCS1B02G038000
PB.29153.3	PB.50648;TraesCS5D02G382000
PB.17671.1	TraesCS3B02G206000
PB.2513.2	PB.2511;PB.2512;PB.3681;TraesCS5D02G274900
PB.42842.1	PB.42840;TraesCS6D02G321900;TraesCS6D02G322000;TraesCS6D02G322100;TraesCS6D02G322200;TraesCS6D02G322300
PB.16246.1	PB.16247;PB.18932;PB.2019;PB.23123;PB.25889;PB.26800;PB.39184;PB.41463;PB.46603;TraesCS3A02G121300;TraesCS3A02G121400;TraesCS3A02G121500;TraesCS3A02G121600;TraesCS3A02G121700;TraesCS3A02G121800
PB.1386.1	PB.1384;PB.1385;TraesCS1A02G142700;TraesCS1A02G142800;TraesCS4D02G306600
PB.40608.1	PB.40609
PB.12193.1	TraesCS2D02G090200
PB.1740.1	TraesCS1A02G259700;TraesCS1A02G259800;TraesCS1B02G270100;TraesCS1D02G259600;TraesCS3A02G338000;TraesCS3A02G401600;TraesCS5A02G191200;TraesCS5A02G513900;TraesCS5B02G097200;TraesCS5B02G192000;TraesCS5D02G199900;TraesCS7A02G474200;TraesCS7B02G375600;TraesCS7D02G132643;TraesCS7D02G461200
PB.35915.1	PB.35914;TraesCS5D02G122900
PB.47176.6	PB.47177
PB.41250.2	PB.41248;PB.42198;PB.45804;PB.485;PB.95;TraesCS1A02G090500;TraesCS1A02G095700;TraesCS1B02G332500;TraesCS5A02G068200;TraesCS6D02G083200;TraesCS6D02G083300;TraesCS6D02G083400;TraesCS6D02G083500
PB.35670.1	PB.34334;PB.35669;TraesCS5D02G033200
PB.20624.1	TraesCS3D02G260500;TraesCS3D02G260600
PB.11268.1	PB.9847;TraesCS2B02G253900
PB.5764.1	PB.4675;PB.5763;TraesCS1D02G091700;TraesCS1D02G091800
PB.4479.1	TraesCS1B02G478900;TraesCS1B02G479000;TraesCS1B02G479100;TraesCS1D02G452600
PB.42862.3	TraesCS6D02G336200;TraesCS6D02G336300;TraesCS6D02G336400;TraesCS6D02G336500
PB.2667.8	TraesCS1B02G193500;TraesCS1B02G193600;TraesCS5A02G205300;TraesCS5A02G372500;TraesCS7A02G424800;TraesCS7D02G416800
PB.37368.1	PB.22807;PB.33373;PB.37367
PB.36953.5	TraesCS6A02G055900;TraesCS6A02G056000;TraesCS6A02G056100;TraesCS6A02G056200;TraesCS6A02G056300
PB.32132.3	TraesCS5B02G186300
PB.21874.1	TraesCS3D02G284600;TraesCS3D02G284700;TraesCS3D02G284800;TraesCS3D02G531900;TraesCS4A02G017800;TraesCS6A02G170100;TraesCS7D02G531200
PB.49239.2	TraesCS4A02G202000;TraesCS7D02G160200;TraesCS7D02G160300
PB.7558.1	TraesCS2A02G361800
PB.46116.3	TraesCS7B02G265100
PB.4533.1	TraesCS1D02G030600;TraesCS1D02G030700;TraesCS1D02G030800;TraesCS1D02G030900
PB.2159.97	PB.19;PB.2159;PB.3341;PB.4488;PB.4491;PB.50771;TraesCS1B02G010200;TraesCS1B02G010300;TraesCS1B02G010500
PB.15515.1	TraesCS1A02G247500;TraesCS3A02G302800;TraesCS6A02G161700;TraesCS6D02G150500
PB.38100.4	TraesCS6A02G140300;TraesCS6A02G140400
PB.16582.1	TraesCS3A02G225200
PB.3419.3	PB.22984;TraesCS1B02G059500;TraesCS1B02G059600
PB.34532.1	PB.29017
PB.2639.1	TraesCS1B02G187000;TraesCS1B02G187100
PB.284.4	TraesCS1A02G125000;TraesCS7A02G424800;TraesCS7D02G416800
PB.9183.1	PB.7835;PB.9182;TraesCS2A02G483200;TraesCS2A02G483300;TraesCS2A02G483400;TraesCS2A02G483500;TraesCS2A02G483600;TraesCS2A02G483700
PB.23418.1	TraesCS4A02G360700;TraesCS4A02G360800
PB.14381.3	PB.14382;TraesCSU02G149938
PB.30660.1	PB.39449;TraesCS1A02G118900
PB.18908.1	PB.18907;TraesCS3B02G160800
PB.6143.8	TraesCS1D02G230800
PB.22635.1	PB.9709;TraesCS4A02G072400;TraesCS4A02G072500;TraesCS4B02G228300;TraesCS4D02G229200
PB.25505.1	TraesCS4B02G210100;TraesCS4B02G210200
PB.21549.4	TraesCS1A02G005368;TraesCS1A02G007300;TraesCS1A02G007344;TraesCS1A02G007400;TraesCS1A02G007405;TraesCS1B02G010400;TraesCS1B02G010500;TraesCS1B02G010700;TraesCS1B02G010800;TraesCS1B02G010900;TraesCS1B02G011000;TraesCS1D02G000567;TraesCS1D02G000582;TraesCS1D02G001000;TraesCS1D02G001100;TraesCS1D02G001200;TraesCS1D02G001400;TraesCS1D02G002063;TraesCS3D02G181500;TraesCSU02G165233;TraesCSU02G210181;Tr…
PB.26792.1	PB.25672;TraesCS4B02G272100;TraesCS4B02G272200
PB.3341.423	PB.19;PB.2159;TraesCS1A02G005315;TraesCS1A02G005368;TraesCS1A02G005387;TraesCS1A02G007300;TraesCS1A02G007344;TraesCS1A02G007400;TraesCS1A02G007405;TraesCS1A02G033288;TraesCS1A02G033501;TraesCS1B02G010200;TraesCS1B02G010300;TraesCS1B02G010400;TraesCS1B02G010500;TraesCS1B02G010700;TraesCS1B02G010800;TraesCS1B02G010900;TraesCS1B02G011000;TraesCS1B02G011300;TraesCS1B02G011400;TraesCS1B02G011439;Traes…
PB.47008.1	PB.45787;PB.47007
PB.33494.2	TraesCS1B02G335100;TraesCS2A02G337800;TraesCS2B02G344200;TraesCS2D02G398700;TraesCS3A02G513000;TraesCS4A02G032100;TraesCS4A02G433200;TraesCS4A02G433300;TraesCS4B02G273500;TraesCS4D02G272500;TraesCS5B02G185600;TraesCS5B02G185700;TraesCS5B02G311400;TraesCS5B02G471700;TraesCS5D02G474200;TraesCS6B02G089400;TraesCS6B02G100500;TraesCS6B02G356300;TraesCS7A02G057700;TraesCS7A02G057800;TraesCS7D02G052500;…
PB.47901.1	TraesCS7D02G116900;TraesCS7D02G117000;TraesCS7D02G117100
PB.42746.1	PB.41834;TraesCS1D02G229700;TraesCS6D02G284700;TraesCS6D02G284800
PB.39190.1	TraesCS6B02G179300;TraesCS6B02G179400;TraesCS6B02G179500;TraesCS6B02G179600
PB.50437.6	TraesCS7A02G299000;TraesCSU02G136300;TraesCSU02G136400
PB.19756.1	TraesCS4A02G213100
PB.35740.1	TraesCS1A02G413800;TraesCS4A02G436900;TraesCS5A02G078400;TraesCS5D02G071000;TraesCS5D02G071100;TraesCS5D02G071200;TraesCS5D02G381400;TraesCS7A02G050300;TraesCS7A02G376500;TraesCS7B02G277900;TraesCS7D02G045500;TraesCS7D02G045700;TraesCS7D02G372800;TraesCSU02G102300;TraesCSU02G102400
PB.41250.1	PB.41248;PB.42198;PB.45804;PB.485;PB.95;TraesCS1A02G095700;TraesCS5A02G068200;TraesCS6D02G083200;TraesCS6D02G083300;TraesCS6D02G083400;TraesCS6D02G083500
PB.45919.3	TraesCS7B02G207900;TraesCS7B02G208000
PB.5707.2	TraesCS1D02G069600
PB.5173.2	TraesCS1D02G261700;TraesCS1D02G261800
PB.30627.1	TraesCS3A02G219700;TraesCS4A02G120200;TraesCS6A02G262800;TraesCS6D02G043100;TraesCS7A02G108500;TraesCS7A02G137600
PB.25213.1	TraesCS4B02G139700;TraesCS6A02G170100;TraesCS7A02G030400
PB.4167.5	TraesCS1B02G323800
PB.276.1	PB.1315;TraesCS7A02G141900
PB.14354.6	PB.12978;PB.14355;TraesCS2D02G373000;TraesCS2D02G373100;TraesCS2D02G373200;TraesCS2D02G373300
PB.18857.2	PB.17504;TraesCS3B02G141900;TraesCS3B02G142000;TraesCS3B02G142100;TraesCS3B02G142200;TraesCS3B02G256800
PB.45400.2	TraesCS1A02G228200;TraesCS1A02G259100;TraesCS1B02G186200;TraesCS1B02G242400;TraesCS4A02G318000;TraesCS5A02G381700;TraesCS5B02G116500;TraesCS5B02G424100;TraesCS6D02G278800;TraesCS6D02G300200;TraesCS7A02G155000;TraesCS7B02G017000;TraesCS7B02G017100;TraesCS7B02G017200;TraesCS7B02G017300;TraesCS7B02G017400;TraesCS7B02G025000;TraesCS7B02G177400;TraesCS7B02G404600;TraesCS7D02G155300;TraesCS7D02G155400
PB.44656.1	TraesCS7A02G246100;TraesCS7A02G246200
PB.23556.1	TraesCS4A02G428400
PB.1055.7	PB.13915;PB.15458;PB.19692;PB.21646;PB.22552;PB.23617;PB.24092;PB.26788;PB.29358;PB.29769;PB.3379;PB.36917;PB.37242;PB.40076;PB.40258;PB.42380;PB.42831;PB.4491;PB.4492;PB.45402;PB.47996;PB.48350;PB.4980;PB.50764;PB.50853;PB.5589;TraesCS1A02G004800;TraesCS1A02G004900;TraesCS1A02G005000;TraesCS1A02G005100;TraesCS1A02G005200;TraesCS1A02G005300;TraesCS1A02G005387;TraesCS1A02G005400;TraesCS1A02G005500…
PB.20331.2	TraesCS3D02G174900;TraesCS3D02G175000
PB.25259.1	PB.25258
PB.22880.2	TraesCS3A02G538100;TraesCS3B02G603500;TraesCS3D02G543500;TraesCS4A02G142300;TraesCS5A02G450000;TraesCS5D02G146000;TraesCS5D02G151200;TraesCS7B02G384300;TraesCS7D02G469000
PB.2882.2	TraesCS1B02G262100;TraesCS1B02G262200;TraesCS6B02G424200;TraesCS7D02G506000
PB.37473.1	PB.37469;PB.37470;TraesCS6A02G242800;TraesCS6A02G242900;TraesCS6A02G243000;TraesCS6A02G243100;TraesCS6A02G243200;TraesCS6A02G243300
PB.41552.2	TraesCS3A02G105200
PB.46058.2	PB.46059;TraesCS7B02G245900
PB.43634.2	TraesCS7A02G299400;TraesCS7A02G299500
PB.27457.3	PB.27456;TraesCS4D02G157600
PB.26368.2	TraesCS4B02G153200
PB.3341.453	PB.2159;PB.4491;TraesCS1A02G005315;TraesCS1A02G005368;TraesCS1A02G005387;TraesCS1A02G007300;TraesCS1A02G007344;TraesCS1A02G007400;TraesCS1A02G007405;TraesCS1A02G033288;TraesCS1A02G033501;TraesCS1B02G010200;TraesCS1B02G010300;TraesCS1B02G010400;TraesCS1B02G010500;TraesCS1B02G010700;TraesCS1B02G010800;TraesCS1B02G010900;TraesCS1B02G011000;TraesCS1B02G011300;TraesCS1B02G011400;TraesCS1B02G011487;Tra…
PB.25666.1	PB.25667;TraesCS4B02G268900;TraesCS4B02G269000;TraesCS4B02G269100;TraesCS4B02G269200;TraesCS7A02G364700
PB.14362.1	TraesCS2D02G375500;TraesCS2D02G375600;TraesCS2D02G375700;TraesCS2D02G375800;TraesCS2D02G376000;TraesCS4D02G241100;TraesCS5B02G457000;TraesCS5D02G141600;TraesCS7A02G443500;TraesCS7B02G342300;TraesCS7D02G432700
PB.31697.1	PB.30612;PB.31696;PB.31698;PB.36310;TraesCS5B02G044200;TraesCS5B02G044300
PB.5219.1	TraesCS1D02G277900
PB.28389.1	PB.28388;TraesCS3A02G108400;TraesCS3A02G143000;TraesCS3A02G367200;TraesCS3D02G110200;TraesCS3D02G360100;TraesCS5B02G223100;TraesCS5B02G428400
PB.3835.1	TraesCS4B02G393600
PB.3496.4	PB.3497
PB.40214.2	TraesCS6B02G129400
PB.43347.1	PB.43346;PB.43348;TraesCS7A02G195300;TraesCS7A02G195400
PB.18803.5	TraesCS2A02G558100;TraesCS2B02G622300;TraesCS3B02G117400;TraesCS3B02G117500;TraesCS3D02G019700;TraesCS6B02G159500;TraesCS6B02G291900;TraesCS7B02G202000;TraesCS7D02G079500;TraesCS7D02G156600
PB.48435.1	TraesCS7B02G072700;TraesCS7D02G320900;TraesCS7D02G321000
PB.8544.1	TraesCS5B02G011000;TraesCS5D02G018200
PB.254.2	TraesCS1A02G116700;TraesCS1A02G116800
PB.43584.3	TraesCS1A02G418500;TraesCS1B02G175200;TraesCS1B02G448500;TraesCS1D02G426200;TraesCS3B02G600300;TraesCS6D02G143100;TraesCS6D02G275800;TraesCS7A02G442100
PB.597.4	PB.598;TraesCS1A02G231400
PB.18572.2	PB.18571;TraesCS3B02G588500;TraesCS3B02G588600;TraesCS3B02G588700;TraesCS3B02G588800;TraesCS3B02G588900;TraesCS3B02G589000
PB.21026.1	PB.21027;TraesCS3D02G436300;TraesCS3D02G436400;TraesCS3D02G436500;TraesCS3D02G436600;TraesCS3D02G436700;TraesCS3D02G436900;TraesCS3D02G437000;TraesCS3D02G437100;TraesCS3D02G437200;TraesCS4A02G462400;TraesCS4B02G380200;TraesCS5D02G336900;TraesCS7A02G027100;TraesCS7D02G127300
PB.49321.1	PB.49322;TraesCS7D02G196700
PB.21161.3	PB.21160;PB.22427;TraesCS2D02G459600
PB.26662.6	TraesCS4B02G227200;TraesCS4B02G227300
PB.4805.1	TraesCS1B02G162900
PB.10658.1	TraesCS1D02G123100;TraesCS2B02G203600;TraesCS2B02G571000;TraesCS2B02G571100;TraesCS2B02G571200;TraesCS3A02G189200;TraesCS3B02G218400;TraesCS4B02G031300;TraesCS4D02G028900;TraesCS5A02G384200;TraesCS7D02G415800;TraesCS7D02G451500
PB.15218.3	TraesCS3A02G200000
PB.36253.1	TraesCS5D02G257600;TraesCS5D02G257700;TraesCS5D02G257800
PB.3341.382	PB.12303;PB.2162;PB.35820;TraesCS1A02G007934;TraesCS1B02G011500;TraesCS1B02G011523
PB.16719.1	TraesCS3A02G267000;TraesCS3A02G271300
PB.50687.8	PB.50686;PB.50688;TraesCSU02G096900;TraesCSU02G097000;TraesCSU02G097100;TraesCSU02G097200
PB.34273.6	PB.35599;TraesCS5D02G000300;TraesCS5D02G000400
PB.39357.2	PB.39358;TraesCS4B02G175200;TraesCS6A02G026700;TraesCS6B02G223400;TraesCS6D02G030500
PB.30151.1	TraesCS5A02G465400;TraesCS5A02G465500;TraesCS5A02G465600;TraesCS5A02G465700;TraesCS5A02G465800;TraesCS5A02G465900
PB.25232.3	PB.25231;TraesCS3B02G173400;TraesCS3D02G155200;TraesCS5A02G354500
PB.45930.1	TraesCS7B02G212800;TraesCS7B02G213000
PB.6064.4	PB.5004;TraesCS1D02G199000;TraesCS1D02G199100;TraesCS1D02G199200
PB.2373.2	PB.2372;PB.2374;PB.2375
PB.2159.113	PB.4491;TraesCS1B02G011300;TraesCS1B02G011400
PB.22652.6	PB.22653
PB.37242.3	PB.37241;TraesCS6A02G175000
PB.1593.2	PB.10995;PB.11298;PB.11992;PB.15795;PB.17954;PB.18635;PB.19492;PB.20657;PB.21493;PB.21622;PB.25488;PB.26800;PB.28247;PB.33373;PB.38269;PB.40770;PB.4089;PB.41463;PB.41834;PB.4426;PB.46152;PB.46603;PB.47105;PB.48038;PB.5702;PB.6418;PB.7254;PB.9716
PB.3740.1	PB.3741
PB.22874.2	TraesCS4A02G141400
PB.27475.4	TraesCS3A02G231800;TraesCS4B02G323400;TraesCS4D02G159700;TraesCS5A02G495400;TraesCS5D02G066400
PB.17688.2	TraesCS3B02G210800
PB.38466.1	TraesCS1B02G036900;TraesCS1D02G030300;TraesCS2A02G461800;TraesCS2B02G319600;TraesCS3A02G214400;TraesCS3B02G600117;TraesCS3D02G242400;TraesCS6A02G256600;TraesCS6A02G368800;TraesCS7D02G348400
PB.31861.1	TraesCS2A02G165400
PB.26515.1	PB.26516;TraesCS4B02G182400
PB.38228.2	TraesCS6A02G181500
PB.16495.1	TraesCS1A02G043400;TraesCS1A02G095400;TraesCS2A02G239000;TraesCS2A02G489800;TraesCS2B02G078400;TraesCS2B02G185500;TraesCS2B02G267200;TraesCS2B02G305800;TraesCS3A02G150200;TraesCS3A02G405500;TraesCS3B02G369700;TraesCS3B02G481800;TraesCS4A02G184600;TraesCS4B02G195700;TraesCS6B02G024800;TraesCS6B02G134100;TraesCS7A02G046700;TraesCS7B02G378900
PB.10417.4	TraesCS2B02G450000;TraesCS2B02G450100;TraesCS2B02G450200
PB.13329.1	TraesCS2A02G553700;TraesCS2A02G553900;TraesCS2A02G557200;TraesCS2A02G557300;TraesCS2B02G585600;TraesCS2D02G555200;TraesCS2D02G555300;TraesCS2D02G555400;TraesCS2D02G555500;TraesCS2D02G555600;TraesCS2D02G555700;TraesCS2D02G555800;TraesCS2D02G555900;TraesCSU02G210000
PB.2159.102	PB.4491;TraesCS1A02G007300;TraesCS1B02G010200;TraesCS1B02G010300;TraesCS1B02G010400;TraesCS1B02G010700;TraesCS1B02G010800;TraesCS1B02G010900;TraesCS1B02G011000;TraesCS1B02G011300;TraesCS1B02G011400;TraesCS1D02G001400;TraesCS2D02G102400
PB.4826.1	PB.4825;PB.4827;TraesCS1D02G135900
PB.37250.2	TraesCS6A02G177700
PB.31855.1	PB.17639;PB.26311;PB.34738;PB.36100;PB.3877;PB.40124;PB.41196;PB.46829;TraesCS3D02G535400;TraesCS5B02G106300;TraesCS5B02G106400;TraesCS7D02G458300
PB.21143.2	TraesCS3D02G511700;TraesCS3D02G511800;TraesCS3D02G511900;TraesCS3D02G512000;TraesCS4D02G318800
PB.38649.1	TraesCS6A02G324300
PB.38046.1	TraesCS6A02G110800;TraesCS6A02G110900
PB.16461.2	TraesCS5A02G306500;TraesCS5D02G313500
PB.43487.2	TraesCS7A02G257200
PB.25232.2	PB.25231;TraesCS1A02G065800;TraesCS3A02G457100
PB.7836.2	TraesCS2A02G483700;TraesCS2A02G483900;TraesCS2A02G484000;TraesCS2A02G484100;TraesCS2A02G484200;TraesCS2A02G484300;TraesCS2A02G484400;TraesCS2A02G484500
PB.41649.1	TraesCS4A02G255300;TraesCS4A02G259300;TraesCS4B02G059600;TraesCS4D02G055700;TraesCS4D02G059400;TraesCS5B02G473000;TraesCS6A02G024900;TraesCS6B02G375400;TraesCS6D02G214500;TraesCS6D02G324200
PB.23999.2	TraesCS2A02G531300
PB.15056.1	PB.16324;TraesCS1A02G208700;TraesCS1B02G222700;TraesCS1B02G289900;TraesCS1D02G280000;TraesCS2A02G408100;TraesCS2D02G405400;TraesCS3A02G156000;TraesCS3A02G364400;TraesCS3D02G438900;TraesCS5D02G346100;TraesCS6D02G183300
PB.19454.1	PB.5317;TraesCS3B02G341600
PB.8902.1	TraesCS2A02G352000;TraesCS2A02G352100;TraesCS2A02G352300
PB.26048.3	TraesCS4B02G060800;TraesCS4B02G060900;TraesCS4B02G061000;TraesCS4B02G061100
PB.8167.2	TraesCS2A02G100900;TraesCS2A02G101000
PB.36953.3	TraesCS6A02G055900;TraesCS6A02G056000;TraesCS6A02G056100;TraesCS6A02G056200;TraesCS6A02G056300
PB.36948.118	PB.37940;PB.37941;PB.40077;PB.50704;PB.50771;PB.50833;TraesCS6A02G049100
PB.31308.3	TraesCS5A02G407500;TraesCS5A02G407600;TraesCS7A02G464400;TraesCS7B02G364900;TraesCS7D02G452000
PB.19226.1	TraesCS3B02G263800;TraesCS3B02G263900;TraesCS3B02G264000
PB.22390.1	TraesCS3D02G502500;TraesCS3D02G502600;TraesCS3D02G502700
PB.26368.1	TraesCS4B02G153200
PB.50091.1	TraesCS7D02G484400
PB.32011.3	PB.29277;TraesCS1A02G324900;TraesCS5B02G145600;TraesCS6A02G096700
PB.49336.1	TraesCS7D02G205100;TraesCS7D02G205200;TraesCS7D02G205300;TraesCS7D02G205400
PB.9925.5	TraesCS2B02G269200
PB.17434.10	PB.18795;PB.20122;PB.42072;TraesCS1B02G050200;TraesCS1D02G035300;TraesCS3B02G111300;TraesCS4B02G189800;TraesCS5B02G492500;TraesCS6D02G382400
PB.48625.1	PB.49865;TraesCS2A02G188900;TraesCS2A02G211700;TraesCS5B02G140600;TraesCS5D02G046900;TraesCS7D02G386700;TraesCS7D02G386800;TraesCS7D02G386900;TraesCS7D02G387000;TraesCS7D02G387100;TraesCS7D02G387200;TraesCS7D02G387300;TraesCS7D02G387400
PB.7770.1	TraesCS1A02G043400;TraesCS1A02G095400;TraesCS2A02G449400;TraesCS2A02G449500;TraesCS2B02G078400;TraesCS2B02G185500;TraesCS3A02G405500;TraesCS4A02G184600;TraesCS4B02G195700
PB.49072.2	TraesCS7D02G069100;TraesCS7D02G069200;TraesCS7D02G069300
PB.3675.1	PB.3676
PB.44812.3	PB.17639;PB.26311;PB.31680;PB.34738;PB.36100;PB.3877;PB.39065;PB.40027;PB.40124;PB.41196;PB.42182;PB.46829;TraesCS1A02G424700
PB.24096.2	PB.22967;PB.24097;TraesCS4A02G164200;TraesCS6B02G416000
PB.5543.1	TraesCS1D02G443900;TraesCS1D02G444000;TraesCS1D02G444100
PB.25213.3	TraesCS2D02G350500;TraesCS3A02G270800;TraesCS3A02G344600;TraesCS3A02G374500;TraesCS3B02G304600;TraesCS3B02G376500;TraesCS3D02G270500;TraesCS3D02G531900;TraesCS4A02G017800;TraesCS4A02G129100;TraesCS4A02G212100;TraesCS4A02G459400;TraesCS4B02G042300;TraesCS4B02G139700;TraesCS4B02G172100;TraesCS4B02G175600;TraesCS5A02G488100;TraesCS5D02G206200;TraesCS6A02G153700;TraesCS6A02G170100;TraesCS6B02G181400;…
PB.11225.1	PB.22526;PB.46829;TraesCS2B02G241500;TraesCS2B02G241600;TraesCS2B02G241700;TraesCS2B02G241800;TraesCS2B02G241900;TraesCS3A02G371200;TraesCS3B02G403400;TraesCS3D02G364300;TraesCS7B02G221100
PB.15031.3	PB.16312;TraesCS3A02G149800
PB.22994.2	TraesCS4A02G171600
PB.3501.1	TraesCS1B02G100600;TraesCS5A02G288800;TraesCS5B02G288200;TraesCS5D02G296600;TraesCS7D02G499700
PB.37473.2	PB.37469;PB.37470;PB.40027;PB.46829;TraesCS6A02G242800;TraesCS6A02G242900;TraesCS6A02G243000;TraesCS6A02G243100;TraesCS6A02G243200;TraesCS6A02G243300
PB.17457.2	PB.13504;PB.17639;PB.26311;PB.31680;PB.34738;PB.36100;PB.3877;PB.39065;PB.40027;PB.40124;PB.41196;PB.42182;PB.46829;TraesCS3B02G122500;TraesCS3B02G122600;TraesCS3B02G122700
PB.3388.1	PB.3387;TraesCS1B02G044100;TraesCS1B02G044200
PB.42862.4	TraesCS6D02G336200;TraesCS6D02G336300;TraesCS6D02G336400;TraesCS6D02G336500
PB.33330.2	PB.33327;PB.33328;PB.33329
PB.23357.4	TraesCS4A02G321200
PB.24162.1	PB.26381;TraesCS4A02G179800;TraesCS4A02G179900;TraesCS4A02G180000;TraesCS7A02G297400;TraesCS7A02G402800
PB.29066.2	PB.30400;TraesCS1B02G201800;TraesCS1D02G177000;TraesCS3D02G522800;TraesCS5A02G034200;TraesCS5A02G034300;TraesCS5A02G034400
PB.10082.1	TraesCS1A02G261200;TraesCS1A02G312200;TraesCS1D02G346400;TraesCS2B02G314600
PB.17122.7	TraesCS1A02G198900;TraesCS1B02G213900;TraesCS1D02G202700;TraesCS3A02G435100;TraesCS5A02G189700;TraesCS5A02G389100;TraesCS5D02G201200;TraesCS7D02G003500
PB.43576.1	TraesCS7A02G283700
PB.35864.2	PB.40182;TraesCS5D02G112200
PB.13454.2	PB.12129;TraesCS2D02G038700;TraesCS2D02G038800;TraesCS2D02G038900;TraesCS2D02G039000;TraesCS2D02G039100;TraesCS2D02G039300;TraesCS2D02G039400;TraesCS2D02G039500;TraesCS2D02G039600
PB.6143.10	TraesCS1D02G230800;TraesCS2A02G268000
PB.24049.4	TraesCS4A02G150500
PB.21161.2	PB.21160;PB.22427;TraesCS1B02G201800;TraesCS1D02G177000;TraesCS1D02G292900;TraesCS2A02G591500;TraesCS2D02G295200;TraesCS2D02G459600;TraesCS4D02G039500;TraesCS4D02G221000;TraesCS6A02G172000;TraesCS6D02G161400;TraesCS6D02G332300;TraesCS6D02G404400;TraesCSU02G001200
PB.8622.1	PB.26502;TraesCS2A02G252100;TraesCS2A02G252200;TraesCS2A02G252300;TraesCS2A02G252400
PB.23121.2	TraesCS4A02G220900;TraesCS4A02G221000
PB.26142.2	PB.35706;TraesCS4B02G093600;TraesCS5B02G333400
PB.49049.4	PB.47813;TraesCS7D02G060600;TraesCS7D02G060700;TraesCS7D02G060800;TraesCS7D02G060900;TraesCS7D02G061000;TraesCS7D02G061100;TraesCS7D02G061200;TraesCS7D02G061300;TraesCS7D02G061400
PB.14853.1	PB.16137;PB.20533;TraesCS3A02G074300;TraesCS3A02G074400;TraesCS3A02G074500;TraesCS3A02G074600;TraesCS3A02G074700;TraesCS3A02G074800;TraesCS3A02G074900
PB.40514.5	TraesCS1B02G050200;TraesCS1B02G172700;TraesCS3A02G106400;TraesCS3D02G042500;TraesCS3D02G108400;TraesCS7B02G351400
PB.40563.2	PB.39446;PB.39447;TraesCS6B02G240400
PB.26116.2	TraesCS1A02G043400;TraesCS1A02G095400;TraesCS2A02G239000;TraesCS2B02G078400;TraesCS2B02G185500;TraesCS2B02G267200;TraesCS2B02G305800;TraesCS3A02G405500;TraesCS3B02G369700;TraesCS4A02G067200;TraesCS4A02G184600;TraesCS4B02G085200;TraesCS4B02G085300;TraesCS4B02G195700;TraesCS6B02G024800;TraesCS6B02G134100;TraesCS7A02G046700;TraesCS7B02G378900
PB.41511.2	PB.17639;PB.26311;PB.34738;PB.36100;PB.3877;PB.39065;PB.40027;PB.40124;PB.41196;PB.42182;PB.46829
PB.7201.3	TraesCS2A02G245700
PB.17629.1	TraesCS3B02G189700;TraesCS3B02G189800
PB.41387.3	PB.42306;TraesCS6D02G135600;TraesCS6D02G135800;TraesCS6D02G135900;TraesCS6D02G136000
PB.23123.4	PB.23122;PB.23124;TraesCS4A02G221900;TraesCS5A02G148400;TraesCS5A02G153400;TraesCS7A02G393900;TraesCS7D02G389300
PB.3341.416	PB.12303;PB.5591;TraesCS1A02G007934;TraesCS1B02G011800;TraesCS1B02G011900
PB.7626.2	TraesCS2A02G390400;TraesCS2A02G390500;TraesCS2B02G041600;TraesCS3D02G067500
PB.2882.1	TraesCS1B02G262100;TraesCS1B02G262200;TraesCS7D02G506000
PB.46184.1	TraesCS3A02G407200;TraesCS3B02G486600;TraesCS5A02G026300;TraesCS5B02G212100;TraesCS6A02G100700;TraesCSU02G033100;TraesCSU02G098500
PB.4010.3	PB.4011;PB.4012;TraesCS1B02G263400
PB.32047.3	TraesCS5B02G156900;TraesCS5B02G157000;TraesCS5B02G157100
PB.50095.2	PB.50095;TraesCS7D02G486300;TraesCS7D02G486400;TraesCS7D02G486500
PB.14579.1	PB.14578;TraesCS2D02G487000;TraesCS2D02G487100;TraesCS2D02G487200;TraesCS2D02G487300;TraesCS2D02G487400;TraesCS2D02G487500;TraesCS2D02G487600;TraesCS7B02G380300
PB.36298.3	TraesCS5D02G276400
PB.15965.3	TraesCS2A02G444000;TraesCS2B02G465200;TraesCS2D02G020100;TraesCS2D02G443200;TraesCS3A02G245300;TraesCS3A02G497200;TraesCS3B02G274600;TraesCS3D02G246200;TraesCS4A02G361900;TraesCS4B02G227400;TraesCS4D02G321800;TraesCS5A02G269800;TraesCS5A02G402000;TraesCS5B02G383500;TraesCS5B02G510900;TraesCS5B02G513900;TraesCS5D02G277900;TraesCS5D02G412200;TraesCS5D02G511200;TraesCS6B02G356900;TraesCS6D02G306100;…
PB.27836.1	TraesCS1B02G320100
PB.48749.1	PB.50006;TraesCS7D02G442300;TraesCS7D02G442400
PB.47501.1	TraesCS7B02G347400;TraesCS7B02G347500
PB.15055.1	TraesCS2A02G514300;TraesCS2D02G515900;TraesCS3A02G048000;TraesCS3A02G155900;TraesCS3B02G034100;TraesCS3B02G456500;TraesCS3D02G416500;TraesCS4A02G207500;TraesCS5A02G535400;TraesCS5D02G218200
PB.10271.2	TraesCS2B02G393100;TraesCS2B02G393200
PB.25290.2	PB.17610;TraesCS4B02G320900
PB.7271.1	TraesCS6D02G030200
PB.21080.1	PB.21078;PB.21081;PB.22324;PB.22325;TraesCS3D02G464000;TraesCS3D02G464100;TraesCS3D02G464200;TraesCS3D02G464300
PB.597.5	PB.10867;PB.15018;PB.22080;PB.22689;PB.27457;PB.33259;PB.3365;PB.40824;PB.40930;PB.47041;PB.47923;PB.48671;PB.598;PB.7788;PB.8430;PB.9000;PB.9716;TraesCS1A02G231400
PB.34061.1	TraesCS5B02G454900;TraesCS5B02G455000;TraesCS5B02G455100;TraesCS5B02G455200
PB.38176.1	PB.37209
PB.36953.6	TraesCS6A02G055900;TraesCS6A02G056000;TraesCS6A02G056100;TraesCS6A02G056200;TraesCS6A02G056300
PB.1126.1	TraesCS7A02G088200
PB.3182.1	PB.4341;TraesCS1B02G400500;TraesCS1B02G400600;TraesCS1B02G400700;TraesCS1B02G400800;TraesCS1B02G400900;TraesCS1B02G401000
PB.21279.1	PB.21278;TraesCS3D02G066400;TraesCS3D02G066500;TraesCS3D02G066600;TraesCS3D02G066700;TraesCS3D02G066800;TraesCS3D02G066900;TraesCS3D02G067000;TraesCS5D02G016800;TraesCS6B02G457200
PB.25149.1	PB.25148
PB.46965.2	TraesCS7B02G164200
PB.20445.1	PB.9671;TraesCS3A02G226300;TraesCS3B02G258200;TraesCS3D02G205100;TraesCS3D02G224300;TraesCS5D02G460600;TraesCS6D02G292600;TraesCS7D02G411100
PB.29071.3	TraesCS5A02G035600;TraesCS5A02G035700
PB.14077.2	TraesCS2D02G277800;TraesCS2D02G277900
PB.19950.1	TraesCS3B02G586700
PB.50677.1	PB.50360;PB.50361;TraesCSU02G092100;TraesCSU02G092300;TraesCSU02G092400
PB.32752.2	PB.34063;TraesCS5B02G455300;TraesCS5B02G455400;TraesCS5B02G455500;TraesCS5B02G455600;TraesCS5B02G455700
PB.1261.2	TraesCS4A02G139200
PB.13335.1	TraesCS2D02G559800
PB.1055.131	PB.4491;TraesCS1A02G007200;TraesCS1A02G007236;TraesCS1A02G007934;TraesCS1D02G426400;TraesCS4B02G001500;TraesCS5D02G308600;TraesCS7A02G078100
PB.4143.2	TraesCS1B02G315600;TraesCS1B02G315700
PB.47001.1	PB.44395
PB.26338.1	TraesCS4A02G291100
PB.16582.2	TraesCS3A02G225200
PB.21549.3	TraesCS3D02G181500
PB.6143.9	TraesCS1D02G230800;TraesCS2A02G268000
PB.38294.1	PB.38295
PB.10960.5	PB.9574;PB.9575;TraesCS2B02G149600;TraesCS2B02G149700;TraesCS2B02G149800;TraesCS2B02G149900;TraesCS2B02G150000;TraesCS2B02G150100;TraesCS5B02G076600
PB.41519.2	TraesCS1B02G203300;TraesCS1B02G371900;TraesCS1D02G162400;TraesCS2D02G008500;TraesCS4B02G320400;TraesCS5B02G366700;TraesCS5D02G165900;TraesCS5D02G171800;TraesCS5D02G517100;TraesCS6A02G260900;TraesCS6B02G117400;TraesCS6B02G288300;TraesCS6B02G404800;TraesCS6D02G241700;TraesCS7A02G427100;TraesCS7A02G427300;TraesCS7A02G455300;TraesCS7A02G528200;TraesCS7B02G327400;TraesCS7D02G419400
PB.12484.5	TraesCS2D02G210500
PB.11981.1	TraesCS2B02G556900;TraesCS2B02G557000;TraesCS2B02G557100
PB.2667.6	TraesCS1B02G193500;TraesCS1B02G193600;TraesCS6A02G026700;TraesCS6D02G030500
PB.8887.1	PB.7516;TraesCS2A02G346500;TraesCS2A02G346600;TraesCS2A02G346700;TraesCS2A02G346900;TraesCS2A02G347000
PB.33571.1	PB.31194;PB.32210;TraesCS5B02G214100
PB.2874.2	TraesCS1B02G259800;TraesCS1B02G259900;TraesCS1B02G260000;TraesCS1B02G260100
PB.31805.2	PB.31806;TraesCS5B02G090700;TraesCS5B02G090800
PB.13454.4	PB.12129;TraesCS1A02G183400;TraesCS1B02G191800;TraesCS2A02G105800;TraesCS2A02G577100;TraesCS2D02G038700;TraesCS2D02G038800;TraesCS2D02G038900;TraesCS2D02G039000;TraesCS2D02G039100;TraesCS2D02G039300;TraesCS2D02G039400;TraesCS2D02G039500;TraesCS2D02G039600;TraesCS4B02G215600
PB.49973.1	PB.49974;TraesCS5D02G196400;TraesCS7D02G430900;TraesCS7D02G431000
PB.30812.1	TraesCS5A02G169800;TraesCS5A02G169900;TraesCS5A02G170000
PB.37219.2	TraesCS6A02G166200;TraesCS6A02G166300;TraesCS6A02G166400
PB.7325.2	PB.8711;PB.8712
PB.39661.2	PB.39660;TraesCS6B02G310900
PB.33587.6	TraesCS5B02G223700
PB.48124.2	PB.48123
PB.26736.1	TraesCS4B02G250300;TraesCS4B02G250400;TraesCS4B02G250500;TraesCS4B02G250600
PB.30589.2	TraesCS1A02G262400
PB.39004.1	TraesCS4B02G334800;TraesCS6B02G109500;TraesCS6B02G109600
PB.17746.2	TraesCS3B02G222400
PB.30832.1	PB.29475
PB.7154.1	TraesCS2A02G231000
PB.11072.1	PB.11074;PB.38077;TraesCS2B02G193200;TraesCS2B02G193300
PB.46177.1	TraesCS7B02G288600;TraesCS7B02G288700;TraesCS7B02G288800
PB.8378.1	PB.6979;TraesCS2A02G177700;TraesCS2A02G177800;TraesCS2A02G177900;TraesCS2A02G178000;TraesCS2A02G178100;TraesCS2A02G178200;TraesCS2A02G178300
PB.22447.1	TraesCS3D02G533400;TraesCS3D02G533500;TraesCS3D02G533600;TraesCS3D02G533700;TraesCS3D02G533800;TraesCS3D02G534000;TraesCS3D02G534100;TraesCS3D02G534200
PB.1593.3	PB.10995;PB.11298;PB.11800;PB.11992;PB.15795;PB.17954;PB.18635;PB.19492;PB.20657;PB.20998;PB.21493;PB.21622;PB.25488;PB.26800;PB.28247;PB.33373;PB.38269;PB.41834;PB.4426;PB.46152;PB.46603;PB.47105;PB.48038;PB.50221;PB.5702;PB.6418;PB.7254;PB.9716
PB.43917.1	PB.42204;TraesCS7A02G408600;TraesCS7A02G408700
PB.49984.1	PB.49983;TraesCS7D02G433500
PB.1055.120	PB.4491;TraesCS1A02G005315;TraesCS1A02G005368;TraesCS1A02G005387;TraesCS1A02G007200;TraesCS1A02G007236;TraesCS1A02G007300;TraesCS1A02G007344;TraesCS1A02G007400;TraesCS1A02G007405;TraesCS1A02G007700;TraesCS1A02G007800;TraesCS1A02G007900;TraesCS1A02G007934;TraesCS1A02G033288;TraesCS1A02G033501;TraesCS1B02G010400;TraesCS1B02G010500;TraesCS1B02G010700;TraesCS1B02G010800;TraesCS1B02G010900;TraesCS1B02…
PB.3341.475	PB.2161;PB.2162;PB.24092;PB.26788;PB.29769;PB.3379;PB.38973;PB.4491;PB.45402;PB.47996;PB.50216;PB.50764;TraesCS1A02G007934;TraesCS1B02G011460;TraesCS1B02G011463;TraesCS1B02G011471;TraesCS1B02G011474;TraesCS1B02G011484
PB.23281.2	PB.23280;PB.23282;TraesCS4A02G280000;TraesCS4A02G280100;TraesCS4A02G280200
PB.26320.2	TraesCS2D02G204600
PB.6644.1	PB.5548;TraesCS1D02G446000;TraesCS6D02G305200;TraesCS7D02G356900
PB.9051.2	TraesCS2A02G407000
PB.39149.5	PB.35706;PB.39148;PB.39150;PB.44395;TraesCS6B02G166700
PB.18735.1	TraesCS3B02G088600
PB.36021.1	PB.34715;PB.34716;PB.34717;TraesCS2A02G484400;TraesCS5D02G162800;TraesCS5D02G162900;TraesCS5D02G163000;TraesCS5D02G163100
PB.46393.3	TraesCS7B02G381000;TraesCS7B02G381100;TraesCS7B02G381200
PB.14307.2	TraesCS5D02G033600;TraesCSU02G179000
PB.41311.2	TraesCS6D02G104400;TraesCS6D02G104500;TraesCS6D02G104600
PB.19205.2	PB.42216
PB.25258.1	PB.25259
PB.42461.3	TraesCS6D02G185100;TraesCS6D02G185200
PB.40134.3	PB.40133;TraesCS6B02G096200;TraesCS6B02G096300;TraesCS6B02G096400
PB.31647.1	PB.31648;TraesCS5B02G017600;TraesCS5B02G017700;TraesCS5B02G017800
PB.31892.2	TraesCS5B02G113600
PB.2159.95	PB.4491;TraesCS1A02G007934;TraesCS1B02G009500;TraesCS1B02G009600;TraesCS1B02G009700;TraesCS1B02G009800;TraesCS1B02G010900;TraesCS1B02G011000;TraesCS1B02G011300;TraesCS1B02G011400
PB.39618.2	TraesCS1A02G423500;TraesCS1B02G455500;TraesCS1D02G432100;TraesCS6B02G297300;TraesCS6B02G297400;TraesCS6B02G297500;TraesCS6B02G297600;TraesCS6B02G297700
PB.1057.1	PB.1056;TraesCS1A02G010500;TraesCS1A02G010600;TraesCS1A02G010700;TraesCS1A02G010800;TraesCS1A02G010900;TraesCS1A02G010905;TraesCS1A02G011100;TraesCS1A02G011200
PB.45143.1	TraesCS3D02G307700;TraesCS3D02G310000;TraesCS3D02G448100;TraesCS4A02G009400;TraesCS4A02G307900;TraesCS4D02G294100;TraesCS5A02G063300;TraesCS5A02G171500;TraesCS5A02G230600;TraesCS5B02G169000;TraesCS5B02G282600;TraesCS5D02G074500;TraesCS5D02G176300;TraesCS5D02G291200;TraesCS5D02G340100;TraesCS6A02G038800;TraesCS6A02G217600;TraesCS6A02G297900;TraesCS6A02G325600;TraesCS6A02G325700;TraesCS6B02G327400;…
PB.417.1	TraesCS1A02G162500;TraesCS1A02G162600;TraesCS1A02G162700;TraesCS1A02G162800
PB.30235.1	TraesCS5A02G505200;TraesCS5A02G505300;TraesCS5A02G505400
PB.17361.3	TraesCS4D02G031300
PB.34287.1	TraesCS5D02G004800;TraesCS5D02G004900;TraesCS5D02G005000;TraesCS5D02G005100
PB.44914.1	PB.44631;TraesCS3B02G127100;TraesCS7A02G322500;TraesCS7A02G388900;TraesCS7D02G384800
PB.41493.2	PB.41492;TraesCS6D02G170200
PB.42320.1	TraesCS1A02G043100;TraesCS2A02G435100;TraesCS2B02G517400;TraesCS2D02G435200;TraesCS2D02G473700;TraesCS3A02G187400;TraesCS3B02G467600;TraesCS3B02G607400;TraesCS3D02G425000;TraesCS3D02G541900;TraesCS4A02G218600;TraesCS4A02G414300;TraesCS4D02G054700;TraesCS5A02G265100;TraesCS5B02G274600;TraesCS6B02G352000;TraesCS6D02G141200;TraesCS6D02G141300;TraesCS6D02G141400;TraesCS6D02G141500;TraesCS7A02G450700;…
PB.9901.2	TraesCS2B02G262100
PB.18790.1	TraesCS3B02G109500;TraesCS3B02G109600
PB.25288.7	PB.25289
PB.45527.3	TraesCS7B02G086300
PB.25277.1	PB.26357
PB.10455.1	PB.11821
PB.18520.2	PB.18518;TraesCS3B02G557100;TraesCS3B02G557200
PB.49869.2	TraesCS5D02G033600;TraesCS7D02G387500;TraesCSU02G179000
PB.8544.2	TraesCS5B02G011000;TraesCS5D02G018200
PB.44192.3	TraesCS7A02G561200;TraesCS7A02G561300;TraesCS7A02G561400
PB.25705.1	TraesCS4B02G286200;TraesCS4B02G286300
PB.44352.1	TraesCS7A02G099900;TraesCS7A02G100000;TraesCS7A02G100100;TraesCS7A02G100200
PB.7201.4	TraesCS2A02G245700
PB.7133.1	TraesCS1D02G107200
PB.6771.3	TraesCS3A02G509200
PB.29175.1	TraesCS7B02G027500
PB.17639.1	PB.11394;PB.15241;PB.15352;PB.15795;PB.18635;PB.20657;PB.21493;PB.21622;PB.28502;PB.2871;PB.32086;PB.32495;PB.35392;PB.36496;PB.38274;PB.38289;PB.39915;PB.40185;PB.40770;PB.4089;PB.40930;PB.4426;PB.44777;PB.46152;PB.48671;PB.49148;PB.5926;PB.7063;PB.7788;PB.9716
PB.41510.1	TraesCS6D02G175800;TraesCS6D02G175900;TraesCS6D02G176000;TraesCS6D02G176100
PB.20130.1	TraesCS3D02G099300;TraesCS3D02G099400;TraesCS3D02G099500;TraesCS3D02G099600
PB.25697.2	PB.18480;PB.31641;PB.40869;PB.46759;TraesCS1A02G424700;TraesCS4B02G282300
PB.11501.1	PB.37826;TraesCS2B02G322200;TraesCS6A02G137400
PB.15998.2	TraesCS3A02G253800;TraesCS3A02G516000;TraesCS3A02G516100;TraesCS3A02G516200;TraesCS3A02G516300;TraesCS3A02G516400;TraesCS3A02G516500;TraesCS3A02G516600;TraesCS3A02G516700;TraesCS3A02G516800;TraesCS3B02G285700;TraesCS3D02G254700;TraesCS3D02G524000;TraesCS5A02G322200;TraesCS6A02G058700;TraesCS6A02G316700;TraesCS6B02G347200;TraesCS6D02G296200;TraesCS7A02G000400;TraesCS7B02G084300;TraesCS7B02G215100;…
PB.11117.1	PB.9694;TraesCS2B02G205800;TraesCS2B02G205900;TraesCS2B02G206000;TraesCS2B02G206100;TraesCS2B02G206200;TraesCS2B02G206300
PB.13910.2	PB.12552;PB.13909;PB.16846
PB.33490.2	TraesCS5B02G184400
PB.21627.1	TraesCS3D02G200400
PB.29810.1	TraesCS2A02G504800
PB.45933.5	TraesCS7B02G213400;TraesCS7B02G213500
PB.45983.2	PB.29651;PB.45794;PB.47196;TraesCS7B02G222400
PB.47971.2	PB.49229;TraesCS7D02G156600;TraesCS7D02G156700;TraesCS7D02G156800;TraesCS7D02G156900;TraesCS7D02G157000
PB.43487.1	TraesCS7A02G257200
PB.43415.10	TraesCS1D02G285900;TraesCS4A02G007900;TraesCS4A02G043100;TraesCS4A02G256800;TraesCS4B02G057700;TraesCS4D02G027400;TraesCS4D02G295900;TraesCS5D02G055500;TraesCS7A02G235200;TraesCS7A02G400100;TraesCS7B02G133400;TraesCS7B02G182000;TraesCS7B02G295100;TraesCS7B02G300200;TraesCS7D02G235200;TraesCS7D02G388600;TraesCS7D02G393900;TraesCSU02G041600
PB.10572.5	PB.10573;TraesCS2B02G522500;TraesCS2B02G522600
PB.17296.2	TraesCS3B02G000900;TraesCS3B02G001000
PB.37439.2	TraesCS5A02G190500;TraesCS5B02G192700
PB.21893.1	PB.21892;TraesCS3D02G290800;TraesCS3D02G290900;TraesCS3D02G291000
PB.41473.1	PB.45804;TraesCS1A02G090500;TraesCS1B02G009900;TraesCS1B02G332500;TraesCS2A02G286400;TraesCS5A02G156000;TraesCS6D02G165300;TraesCS6D02G165400;TraesCS7A02G332300;TraesCSU02G272100
PB.19.49	PB.35820;PB.4509;PB.50771;PB.5923;TraesCS1A02G007400;TraesCS1A02G007405;TraesCS1A02G007800;TraesCS1A02G007900;TraesCS1A02G007934;TraesCS7D02G058700
PB.35029.1	TraesCS5D02G297700;TraesCS5D02G297800
PB.16502.2	TraesCS2B02G353500;TraesCS4B02G367500;TraesCS4D02G038900;TraesCS4D02G360000;TraesCS5A02G535300;TraesCS6D02G258100;TraesCS7A02G145100
PB.31218.2	TraesCS5A02G365600;TraesCS5A02G365700;TraesCS5A02G365800;TraesCS5A02G365900;TraesCS5A02G366000;TraesCS5A02G366100;TraesCS5A02G366200;TraesCS5B02G417200;TraesCS6A02G155600;TraesCS6D02G145600
PB.23124.1	PB.23123
PB.6064.2	PB.5004;TraesCS1D02G199000;TraesCS1D02G199100;TraesCS1D02G199200;TraesCS3B02G496500;TraesCS3D02G449300;TraesCS4A02G005600;TraesCS4A02G110500;TraesCS4B02G299400;TraesCS4D02G055900;TraesCS4D02G342300;TraesCS6A02G213400;TraesCS6D02G027700;TraesCS7A02G167000;TraesCS7A02G408900;TraesCS7B02G162400;TraesCS7D02G167600;TraesCS7D02G265300
PB.40588.9	PB.39470;TraesCS6B02G247500
PB.35426.1	PB.36727;PB.36728;PB.36729;TraesCS5D02G480400
PB.24142.3	PB.1791;PB.24141;TraesCS4A02G174000
PB.28736.2	TraesCS4D02G248400;TraesCS4D02G248500;TraesCS4D02G248600
PB.17029.4	PB.15761;TraesCS3A02G387900;TraesCS3A02G388000
PB.2667.3	TraesCS1B02G193500;TraesCS1B02G193600;TraesCS6A02G026700;TraesCS6D02G030500
PB.50208.3	TraesCS3B02G595200;TraesCS7D02G552900
PB.5637.1	PB.49181;PB.5636;PB.5637;TraesCS1D02G037200;TraesCS1D02G037300;TraesCS1D02G037335;TraesCS1D02G037400;TraesCS1D02G037500
PB.44467.1	TraesCS7A02G169000
PB.10960.3	PB.9574;PB.9575;TraesCS2B02G149600;TraesCS2B02G149700;TraesCS2B02G149800;TraesCS2B02G149900;TraesCS2B02G150000;TraesCS2B02G150100
PB.24336.1	PB.17610;PB.23176;PB.24335;TraesCS4A02G243300;TraesCS4A02G243400;TraesCS4A02G243500
PB.9715.1	PB.9716;TraesCS2B02G213600
PB.1902.2	PB.1903;TraesCS1A02G328100;TraesCS1A02G328200;TraesCS1A02G328300;TraesCS1A02G328400;TraesCS1A02G328500;TraesCS1A02G328600;TraesCS1A02G328700;TraesCS1A02G328800
PB.24142.2	PB.1791;PB.24141;TraesCS4A02G174000
PB.33276.5	TraesCS5B02G119600
PB.47106.2	TraesCS7B02G197500
PB.6143.7	TraesCS1D02G230800
PB.11334.4	PB.9910;PB.9911;TraesCS1A02G043400;TraesCS1A02G095400;TraesCS2A02G489800;TraesCS2B02G078400;TraesCS2B02G185500;TraesCS2B02G264300;TraesCS2B02G264400;TraesCS2B02G264500;TraesCS2B02G267200;TraesCS2B02G305800;TraesCS3A02G150200;TraesCS3A02G405500;TraesCS3B02G481800;TraesCS4A02G184600;TraesCS4B02G195700;TraesCS6B02G024800;TraesCS7B02G378900
PB.3643.1	TraesCS1B02G140900
PB.41567.1	PB.41568;PB.41569;TraesCS6D02G186700
PB.26433.3	PB.18777;PB.31236;PB.45900;PB.47169;TraesCS1A02G005600;TraesCS1A02G090000;TraesCS2B02G063600;TraesCS3A02G461800;TraesCS5A02G261700;TraesCS5B02G058100;TraesCS7A02G555200
PB.40488.1	TraesCS4A02G209600
PB.26639.3	TraesCS4B02G218700
PB.8516.3	TraesCS2A02G231000
PB.7252.1	PB.7253;PB.7254;TraesCS7A02G101700
PB.16461.1	TraesCS2B02G380700
PB.7557.2	PB.46829
PB.10363.2	PB.10364
PB.47971.1	PB.49229;TraesCS7D02G156600;TraesCS7D02G156700;TraesCS7D02G156800;TraesCS7D02G156900;TraesCS7D02G157000
PB.16070.1	TraesCS3A02G029400;TraesCS3A02G029500;TraesCS3A02G029700;TraesCS3A02G029800;TraesCS3A02G029900
PB.28925.5	TraesCS4D02G325700;TraesCS4D02G325800
PB.22595.5	PB.23767;TraesCS4A02G056100;TraesCS4A02G056200;TraesCS4A02G056300
PB.44734.4	TraesCS4D02G055700;TraesCS6B02G308100;TraesCS6D02G259700;TraesCS7A02G270100
PB.29175.3	TraesCS7B02G027500
PB.17673.1	TraesCS3B02G206100
PB.45718.2	TraesCS7B02G156300
PB.41510.2	TraesCS2A02G452400;TraesCS2B02G127600;TraesCS2B02G358100;TraesCS3B02G310300;TraesCS3D02G007600;TraesCS4A02G433400;TraesCS4A02G433500;TraesCS4A02G433600;TraesCS4B02G222400;TraesCS4D02G010100;TraesCS4D02G222900;TraesCS5A02G337000;TraesCS5A02G400700;TraesCS5A02G443300;TraesCS5B02G405500;TraesCS6D02G175800;TraesCS6D02G175900;TraesCS6D02G176000;TraesCS6D02G176100;TraesCS7A02G060800;TraesCS7A02G550900;…
PB.27038.2	TraesCS4B02G398000;TraesCS4B02G398100
PB.8122.1	PB.8123;TraesCS2A02G079300;TraesCS2A02G079400;TraesCS2A02G079500;TraesCS2A02G079600;TraesCS2A02G079700;TraesCS2A02G079800;TraesCS2A02G079900;TraesCS2A02G080000;TraesCS2A02G080100;TraesCS2A02G080200;TraesCS4B02G270600;TraesCS5D02G317600
PB.25860.3	TraesCS4B02G354800;TraesCS4B02G354900;TraesCS4B02G355000;TraesCS4B02G355100;TraesCS4B02G355200;TraesCS4B02G355300;TraesCS4B02G355400
PB.41106.10	TraesCS3B02G111100;TraesCS6B02G008200;TraesCS6D02G000100;TraesCS6D02G000200;TraesCS6D02G000300
PB.27873.1	PB.28862;TraesCS4D02G298200;TraesCS4D02G298300
PB.5298.1	TraesCS1D02G317200;TraesCS1D02G317211;TraesCS1D02G317300;TraesCS1D02G317301;TraesCS1D02G317400;TraesCS1D02G317500
PB.10010.4	TraesCS2A02G275700;TraesCS2B02G293400;TraesCS2B02G293500;TraesCS2D02G274700
PB.22652.8	PB.22653
PB.23469.2	TraesCS4A02G382400;TraesCS4A02G382500;TraesCS4A02G382600;TraesCS4A02G382700;TraesCS4A02G406000;TraesCS4D02G303700;TraesCS7A02G084400
PB.42894.1	PB.17639;PB.26311;PB.31680;PB.34738;PB.36100;PB.3877;PB.39065;PB.40027;PB.40124;PB.41196;PB.42182;PB.46829;TraesCS6D02G356100;TraesCS6D02G356200;TraesCS6D02G356300;TraesCS6D02G356400;TraesCS6D02G356500;TraesCS6D02G356600
PB.33319.4	PB.33318;PB.33320;TraesCS5B02G133100
PB.13862.3	TraesCS2D02G219100
PB.22864.4	TraesCS1D02G030200;TraesCS7A02G529900
PB.39570.1	TraesCS6B02G282800;TraesCS7A02G402800
PB.22969.1	TraesCS4A02G165000;TraesCS4A02G165100;TraesCS7A02G435300
PB.38094.2	PB.37130;PB.37131;PB.38095;TraesCS6A02G136900;TraesCS6A02G137000
PB.15162.3	PB.13504;PB.15459;PB.16430;PB.17639;PB.26311;PB.31680;PB.34738;PB.36100;PB.3877;PB.39065;PB.40027;PB.40124;PB.41196;PB.42182;PB.46829;TraesCS1A02G084500;TraesCS1A02G135300;TraesCS1B02G101800;TraesCS1D02G085900;TraesCS1D02G131500;TraesCS2B02G272800;TraesCS2D02G236300;TraesCS3A02G443000;TraesCS3B02G452000;TraesCS5D02G409200
PB.22952.1	PB.22953;TraesCS2D02G313300;TraesCS4A02G162000
PB.27457.4	PB.13504;PB.17639;PB.26311;PB.27456;PB.34738;PB.36100;PB.3877;PB.39065;PB.40027;PB.40124;PB.41196;PB.42182;PB.46829;TraesCS3D02G499700;TraesCS3D02G499900;TraesCS4D02G157600;TraesCS7D02G405600
PB.8563.1	TraesCS2A02G116100;TraesCS2B02G611700;TraesCS3A02G286100;TraesCS3B02G320400;TraesCS3D02G267900;TraesCS3D02G302900;TraesCS4A02G020500;TraesCS4A02G286500;TraesCS4B02G283200;TraesCS4B02G322200;TraesCS4D02G258800;TraesCS4D02G282000;TraesCS4D02G290800;TraesCS4D02G318800;TraesCS5A02G232200;TraesCS5A02G494500;TraesCS5D02G235800;TraesCS6B02G224100;TraesCS6B02G326200;TraesCS7A02G215000;TraesCS7A02G322200;…
PB.5298.2	TraesCS1D02G317200;TraesCS1D02G317211;TraesCS1D02G317300;TraesCS1D02G317301;TraesCS1D02G317400;TraesCS1D02G317500
PB.47971.3	PB.49229;TraesCS7D02G156600;TraesCS7D02G156700;TraesCS7D02G156800;TraesCS7D02G156900;TraesCS7D02G157000
PB.284.3	TraesCS1A02G125000;TraesCS7A02G424800;TraesCS7D02G416800
PB.18835.2	PB.17477;TraesCS3B02G131700;TraesCS3B02G131800;TraesCS3B02G131900;TraesCS3B02G132000
PB.29613.1	TraesCS5A02G223500;TraesCS5A02G223600;TraesCS5A02G223700
PB.20423.2	TraesCS2D02G399000;TraesCS3D02G200100
PB.49745.1	PB.49746
PB.1306.3	TraesCS1A02G424700;TraesCS4B02G041000
PB.10327.1	TraesCS1A02G043400;TraesCS1A02G095400;TraesCS2B02G078400;TraesCS2B02G185500;TraesCS2B02G267200;TraesCS2B02G305800;TraesCS3A02G405500;TraesCS4A02G184600;TraesCS4B02G195700;TraesCS7A02G046700;TraesCS7B02G378900
PB.15031.2	PB.16312;TraesCS3A02G149800
PB.46916.3	PB.45698;PB.46915;TraesCS7B02G149500;TraesCS7B02G149600;TraesCS7B02G149700
PB.41106.12	PB.42072;TraesCS1B02G268400;TraesCS1B02G398400;TraesCS6A02G361600;TraesCS6B02G395000;TraesCS6B02G454200;TraesCS6D02G000100;TraesCS6D02G000300
PB.9576.5	TraesCS2B02G150300
PB.4395.1	TraesCS1B02G431900
PB.2829.3	TraesCS1B02G245700
PB.50371.1	PB.50370;TraesCSU02G098900
PB.20169.2	TraesCS3D02G113300;TraesCS3D02G113400;TraesCS3D02G113500;TraesCS3D02G113600;TraesCS3D02G113700
PB.3341.319	PB.2162;PB.37939;PB.37940;PB.37941;PB.40076;PB.40077;PB.50704;PB.50771;PB.50833;TraesCS1A02G007934;TraesCS1B02G011439
PB.36953.4	TraesCS6A02G055900;TraesCS6A02G056000;TraesCS6A02G056100;TraesCS6A02G056200;TraesCS6A02G056300
PB.19454.2	PB.5317;TraesCS3B02G341600
PB.3522.2	PB.24231;PB.3523;TraesCS1B02G107500
PB.40495.1	PB.39379
PB.30340.1	TraesCS5A02G004400;TraesCS5A02G004500;TraesCS5A02G004600
PB.9222.2	PB.7898;TraesCS2A02G509400;TraesCS2A02G509500;TraesCS2A02G509600;TraesCS2A02G509700;TraesCS2A02G509800;TraesCS2A02G509900;TraesCS2A02G510000
PB.15329.2	TraesCS3A02G227700
PB.14077.3	TraesCS2D02G277800;TraesCS2D02G277900
PB.34773.1	TraesCS5D02G181300
PB.8356.1	PB.6966
PB.29819.5	TraesCS5A02G311181;TraesCS5A02G311200;TraesCS5A02G311300;TraesCS5A02G311400
PB.4205.1	PB.4203;PB.4204;TraesCS1B02G370600;TraesCS4A02G213100;TraesCS4D02G099900;TraesCS5D02G409600;TraesCS6A02G287500;TraesCS7A02G161500;TraesCS7A02G346900
PB.46915.2	PB.45698;PB.46916;TraesCS7B02G149500;TraesCS7B02G149600;TraesCS7B02G149700
PB.2420.2	TraesCS1B02G127000;TraesCS1B02G127100;TraesCS1B02G127200;TraesCS4A02G064200;TraesCS4D02G122000;TraesCS5A02G137000;TraesCS7B02G118700
PB.36811.2	TraesCS4A02G355800;TraesCS5D02G516300;TraesCS5D02G516400;TraesCS5D02G516600;TraesCS5D02G516700;TraesCS5D02G516800;TraesCS5D02G516900;TraesCS5D02G517000
PB.14013.2	PB.37267;TraesCS2D02G257600;TraesCS2D02G257700
PB.24162.2	PB.26381;TraesCS4A02G179800;TraesCS4A02G179900;TraesCS4A02G180000;TraesCS7A02G297400;TraesCS7A02G402800
PB.17039.1	PB.15775;TraesCS3A02G392800;TraesCS3A02G392900;TraesCS3A02G393000;TraesCS7A02G424800;TraesCS7D02G416800
PB.2577.1	TraesCS1A02G257700;TraesCS1B02G168200;TraesCS1B02G168300;TraesCS1D02G257000;TraesCS5A02G227600;TraesCS7B02G274500
PB.26142.3	PB.35706;TraesCS4B02G093600;TraesCS5B02G333400
PB.36914.1	TraesCS6A02G024900;TraesCS6A02G025000;TraesCS6A02G025100;TraesCS6A02G025200
PB.13263.3	TraesCS2A02G296400;TraesCS2D02G514700;TraesCS2D02G514800;TraesCS2D02G514900;TraesCS2D02G515000;TraesCS2D02G515200;TraesCS2D02G515300;TraesCS2D02G515400;TraesCS2D02G515600;TraesCS2D02G515700;TraesCS2D02G515800;TraesCS4D02G018900;TraesCS5A02G155400;TraesCS5A02G289300;TraesCS5A02G415600;TraesCS5B02G013000;TraesCS5B02G153700;TraesCS5B02G163300;TraesCS5B02G253400;TraesCS5B02G481300;TraesCS5D02G031000;…
PB.34273.7	PB.35599;PB.4133;TraesCS5D02G000300;TraesCS5D02G000400
PB.25202.3	TraesCS4B02G136200
PB.25859.2	TraesCS4B02G353800;TraesCS4B02G353900
PB.32981.3	PB.31709;TraesCS5B02G010400;TraesCS5B02G010500;TraesCS5B02G010600;TraesCS5B02G010700
PB.2518.1	TraesCS1B02G437000;TraesCS7B02G369800;TraesCS7D02G384000
PB.46499.1	TraesCS7B02G442400
PB.32730.1	PB.32729
PB.46393.2	TraesCS7A02G457600;TraesCS7B02G381000;TraesCS7B02G381100;TraesCS7B02G381200
PB.14077.1	TraesCS2D02G277800;TraesCS2D02G277900
PB.14498.2	PB.13141;PB.47485;TraesCS1A02G285300;TraesCS1B02G294500;TraesCS1D02G284300;TraesCS2D02G440500;TraesCS2D02G440600;TraesCS2D02G440700
PB.17434.9	PB.17434;PB.18795;PB.20122;PB.42072;TraesCS1B02G050200;TraesCS1D02G035300;TraesCS3B02G111200;TraesCS4B02G189800;TraesCS6D02G382400
PB.20130.2	TraesCS3D02G099300;TraesCS3D02G099400;TraesCS3D02G099500;TraesCS3D02G099600
PB.31774.2	TraesCS4D02G306600;TraesCS5D02G097300
PB.9491.3	PB.12207
PB.47025.1	PB.47026;TraesCS4A02G316800;TraesCS4A02G496700;TraesCS4B02G069200;TraesCS5B02G398100;TraesCS5B02G562100;TraesCS5D02G567300;TraesCS6A02G107300;TraesCS6A02G271000;TraesCS6B02G135800;TraesCS6B02G298100;TraesCS6D02G095400;TraesCS6D02G244100;TraesCS7B02G034400;TraesCS7B02G113200;TraesCS7B02G274400
PB.4599.5	PB.5691
PB.19399.2	TraesCS3B02G325200;TraesCS3B02G325300;TraesCS3D02G112100;TraesCS3D02G290200;TraesCS5B02G240700;TraesCS5B02G440700
PB.7693.1	PB.7692;TraesCS2A02G338700;TraesCS2A02G418500
PB.17509.1	PB.17507;PB.17508
PB.450.1	PB.1490;PB.451;TraesCS1A02G173600;TraesCS1A02G173700;TraesCS1A02G173800
PB.37347.1	TraesCS2A02G341700;TraesCS2A02G487800;TraesCS5A02G012800;TraesCS5B02G011100;TraesCS7A02G025000
PB.45025.2	TraesCS7A02G361600
PB.43472.3	PB.43471;PB.44677
PB.15943.3	PB.15942;PB.17195;TraesCS3A02G478500;TraesCS3A02G478600;TraesCS3A02G478700;TraesCS3A02G478800;TraesCS3A02G478900;TraesCS3A02G479000;TraesCS3A02G479100
PB.45979.4	TraesCS7B02G222100
PB.4555.1	PB.5646
PB.13454.5	PB.12129;TraesCS2D02G038700;TraesCS2D02G038800;TraesCS2D02G038900;TraesCS2D02G039000;TraesCS2D02G039100;TraesCS2D02G039300;TraesCS2D02G039400;TraesCS2D02G039500;TraesCS2D02G039600
PB.49181.1	PB.47937;PB.49180;PB.5637;TraesCS3B02G565700;TraesCS7D02G136700;TraesCS7D02G136800
PB.43032.3	TraesCS7A02G026000;TraesCS7A02G026100;TraesCS7A02G026200;TraesCS7A02G026300
PB.1064.2	TraesCS1A02G013600;TraesCS1A02G013700;TraesCS1A02G013800;TraesCS1A02G013900;TraesCS1A02G014000;TraesCS1A02G014100;TraesCS1A02G014200
PB.32312.1	PB.33656;TraesCS1D02G048200;TraesCS1D02G415000;TraesCS1D02G454500;TraesCS2A02G257200;TraesCS2B02G285400;TraesCS3D02G277800;TraesCS4A02G135200;TraesCS4A02G455800;TraesCS4B02G083300;TraesCS4D02G172000;TraesCS5A02G259200;TraesCS5B02G258300;TraesCS5B02G258400;TraesCS5B02G258500;TraesCS5D02G233900;TraesCS5D02G261900;TraesCS6A02G131200;TraesCS7A02G162100;TraesCS7A02G441500;TraesCS7A02G533400;TraesCS7B0…
PB.24049.3	TraesCS4A02G150500
PB.14963.3	TraesCS5A02G292200;TraesCS7A02G495500;TraesCS7D02G482800
PB.24056.1	TraesCS4A02G151100
PB.44910.1	TraesCS7A02G412500;TraesCS7D02G405600
PB.25846.7	PB.25846;TraesCS4B02G346700;TraesCS4B02G346800
PB.16436.1	TraesCS2B02G115500;TraesCS2D02G338600
PB.6842.1	TraesCS2A02G117800;TraesCS2A02G117900
