# Supplementary material for: The Landscapes of Gluten Regulatory Network in Elite Wheat Cultivars Contrasting in Gluten Strength
Source: Int J Mol Sci. 2023 May 29;24(11):9447. doi: 10.3390/ijms24119447 (PMC10253585; doi:10.3390/ijms24119447)
Supplement: Supplementary file 1 [file ijms-24-09447-s001.zip › Table S17.xlsx]

## Sheet: Integrated_Function.anno.1
Supplementary Table S17: List of 15 candidates
Isoforms	Gene ID	GO_annotation	KEGG_annotation	KEGG_pathway_annotation	Pfam_annotation	Swiss-Prot_annotation
PB.2006.4	TraesCS1A02G375600	Molecular Function: DNA-binding transcription factor activity (GO:0003700);; Cellular Component: nucleus (GO:0005634);; Cellular Component: cytoplasm (GO:0005737);; Biological Process: regulation of transcription, DNA-templated (GO:0006355);; Biological Process: methionine metabolic process (GO:0006555);; Biological Process: cellular amino acid biosynthetic process (GO:0008652);; Molecular Functi…	K09419|0|bdi:100828307|K09419 heat shock transcription factor, other eukaryote | (RefSeq) heat stress transcription factor A-2c	--	HSF-type DNA-binding	Heat stress transcription factor A-2c OS=Oryza sativa subsp. japonica (Rice) PE=1 SV=2
TraesCS2A02G033700.1	TraesCS2A02G033700	Molecular Function: ATP binding (GO:0005524);; Biological Process: protein folding (GO:0006457);; Molecular Function: unfolded protein binding (GO:0051082);;	K04079|0.0e+00|ats:109738213|K04079 molecular chaperone HtpG | (RefSeq) LOC109738213; heat shock protein 83	Protein processing in endoplasmic reticulum (ko04141);; Plant-pathogen interaction (ko04626)	Hsp90 protein	Heat shock protein 82 OS=Zea mays OX=4577 GN=HSP82 PE=3 SV=1
TraesCS2A02G386800.1	TraesCS2A02G386800	Molecular Function: molecular_function (GO:0003674);; Molecular Function: binding (GO:0005488);; Molecular Function: protein binding (GO:0005515);; Biological Process: biological_process (GO:0008150);; Biological Process: cellular process (GO:0009987);; Biological Process: cellular component organization (GO:0016043);; Biological Process: cellular component assembly (GO:0022607);; Molecular Funct…	K09553|1.6e-276|ats:109765882|K09553 stress-induced-phosphoprotein 1 | (RefSeq) LOC109765882; hsp70-Hsp90 organizing protein	--	Tetratricopeptide repeat	Hsp70-Hsp90 organizing protein OS=Triticum aestivum OX=4565 GN=HOP PE=1 SV=1
PB.13441.3	TraesCS2D02G033200	Molecular Function: ATP binding (GO:0005524);; Cellular Component: cytoplasm (GO:0005737);; Biological Process: protein folding (GO:0006457);; Biological Process: response to stress (GO:0006950);; Molecular Function: unfolded protein binding (GO:0051082);;	K04079|0|bdi:100824256|K04079 molecular chaperone HtpG | (RefSeq) heat shock protein 82	Protein processing in endoplasmic reticulum (ko04141);; Plant-pathogen interaction (ko04626)	Hsp90 protein;; Histidine kinase-, DNA gyrase B-, and HSP90-like ATPase;; Histidine kinase-, DNA gyrase B-, and HSP90-like ATPase	Heat shock protein 82 GN=HSP82 OS=Zea mays (Maize) PE=3 SV=1
PB.20810.1	TraesCS3D02G344700	Cellular Component: mitochondrion (GO:0005739);; Cellular Component: cytosol (GO:0005829);; Biological Process: response to salt stress (GO:0009651);; Biological Process: vegetative to reproductive phase transition of meristem (GO:0010228);; Molecular Function: chaperone binding (GO:0051087);;	--	--	BAG domain;; Ubiquitin family	BAG family molecular chaperone regulator 4 GN=BAG4 OS=Arabidopsis thaliana (Mouse-ear cress) PE=1 SV=1
TraesCS5A02G547300.1	TraesCS5A02G547300	Molecular Function: ATP binding (GO:0005524);; Cellular Component: cytoplasm (GO:0005737);; Biological Process: response to heat (GO:0009408);; Biological Process: protein refolding (GO:0042026);;	K03695|0.0e+00|ats:109742974|K03695 ATP-dependent Clp protease ATP-binding subunit ClpB | (RefSeq) LOC109742974; chaperone protein ClpB2, chloroplastic	--	AAA domain (Cdc48 subfamily)	Chaperone protein ClpB2, chloroplastic OS=Oryza sativa subsp. japonica OX=39947 GN=CLPB2 PE=2 SV=1
PB.16957.1	PB.16957	Molecular Function: ATP binding (GO:0005524);;	K03283|0|bdi:100840403|K03283 heat shock 70kDa protein 1/2/6/8 | (RefSeq) heat shock cognate 70 kDa protein	Spliceosome (ko03040);; Protein processing in endoplasmic reticulum (ko04141);; Endocytosis (ko04144)	Hsp70 protein;; MreB/Mbl protein;; Hsp70 protein	Heat shock cognate 70 kDa protein GN=HSP70 OS=Petunia hybrida (Petunia) PE=2 SV=1
PB.28836.2	PB.28836	Cellular Component: cytoplasm (GO:0005737);; Cellular Component: proteasome regulatory particle, lid subcomplex (GO:0008541);; Cellular Component: integral component of membrane (GO:0016021);; Cellular Component: nuclear proteasome complex (GO:0031595);; Biological Process: proteasome-mediated ubiquitin-dependent protein catabolic process (GO:0043161);;	K03035|1.16983e-09|bdi:100831617|K03035 26S proteasome regulatory subunit N5 | (RefSeq) 26S proteasome non-ATPase regulatory subunit 12 homolog A	Proteasome (ko03050)	--	--
PB.2006.2	TraesCS1A02G375600	Molecular Function: DNA-binding transcription factor activity (GO:0003700);; Cellular Component: nucleus (GO:0005634);; Biological Process: regulation of transcription, DNA-templated (GO:0006355);; Biological Process: methionine metabolic process (GO:0006555);; Molecular Function: identical protein binding (GO:0042802);; Molecular Function: sequence-specific DNA binding (GO:0043565);;	K09419|4.02582e-75|bdi:100828307|K09419 heat shock transcription factor, other eukaryote | (RefSeq) heat stress transcription factor A-2c	--	--	Heat stress transcription factor A-2c OS=Oryza sativa subsp. japonica (Rice) PE=1 SV=2
TraesCS1D02G131800.1	TraesCS1D02G131800	Molecular Function: ATP binding (GO:0005524);; Biological Process: protein folding (GO:0006457);; Molecular Function: unfolded protein binding (GO:0051082);;	K03283|0.0e+00|ats:109787241|K03283 heat shock 70kDa protein 1/2/6/8 | (RefSeq) LOC109787241; heat shock 70 kDa protein 6, chloroplastic-like	Spliceosome (ko03040);; Protein processing in endoplasmic reticulum (ko04141);; Endocytosis (ko04144)	Hsp70 protein	Stromal 70 kDa heat shock-related protein, chloroplastic OS=Pisum sativum OX=3888 GN=HSP70 PE=2 SV=1
PB.45672.3	TraesCS7B02G143600	Biological Process: response to light stimulus (GO:0009416);;	--	--	Leucine rich repeat;; Leucine Rich repeats (2 copies);; Leucine Rich Repeat	Plant intracellular Ras-group-related LRR protein 4 GN=P0711H09.3 OS=Oryza sativa subsp. japonica (Rice) PE=2 SV=1
TraesCS1A02G295600.1	TraesCS1A02G295600	Molecular Function: ATP binding (GO:0005524);; Biological Process: protein folding (GO:0006457);; Molecular Function: unfolded protein binding (GO:0051082);;	K04043|0.0e+00|ats:109762937|K04043 molecular chaperone DnaK | (RefSeq) LOC109762937; heat shock 70 kDa protein, mitochondrial-like	RNA degradation (ko03018)	Hsp70 protein	Heat shock 70 kDa protein, mitochondrial OS=Phaseolus vulgaris OX=3885 PE=2 SV=1
TraesCS3A02G034000.1	TraesCS3A02G034000	Cellular Component: cellular_component (GO:0005575);; Cellular Component: intracellular (GO:0005622);; Cellular Component: obsolete cell (GO:0005623);; Cellular Component: cytoplasm (GO:0005737);; Biological Process: biological_process (GO:0008150);; Cellular Component: chloroplast (GO:0009507);; Cellular Component: plastid (GO:0009536);; Biological Process: cellular process (GO:0009987);; Biolog…	K13993|4.1e-78|ats:109738376|K13993 HSP20 family protein | (RefSeq) LOC109738376; 16.9 kDa class I heat shock protein 2-like	Protein processing in endoplasmic reticulum (ko04141)	Hsp20/alpha crystallin family	16.9 kDa class I heat shock protein 2 OS=Triticum aestivum OX=4565 GN=hsp16.9B PE=1 SV=1
PB.25547.2	TraesCS4B02G222300	Molecular Function: DNA binding (GO:0003677);; Molecular Function: translation initiation factor activity (GO:0003743);; Molecular Function: catalytic activity (GO:0003824);; Cellular Component: nucleus (GO:0005634);; Biological Process: transcription initiation from RNA polymerase II promoter (GO:0006367);; Biological Process: translational initiation (GO:0006413);; Cellular Component: integral …	K03138|1.04554e-176|bdi:100843935|K03138 transcription initiation factor TFIIF subunit alpha | (RefSeq) transcription initiation factor IIF subunit alpha	Basal transcription factors (ko03022)	Transcription initiation factor IIF, alpha subunit (TFIIF-alpha)	--
PB.27586.3	TraesCS4D02G189000	--	--	--	DnaJ domain	--
